# Supplementary material
Source: publisher figshare collection journal article supplement (https://springernature.figshare.com/ndownloader/files/17990693)
Supplement: Supplementary file 1 [file 17990693]

## Sheet: Random selection 1750 EIDs
EID	Publication year	Title	Abstract	First detection of contaminant in the aquatic environment?	Remarks
2-s2.0-29644442710	2006	Processes driving the episodic flux of faecal indicator organisms in streams impacting on recreational and shellfish harvesting waters	Understanding the process controls on episodic fluxes of faecal indicator organisms (FIOs) is becoming increasingly important for the sustainable management and accurate modelling of water quality in both recreational and shellfish harvesting waters. Both environments exhibit transitory non-compliance with microbiological standards after rainfall episodes despite significant expenditures on contr…	No
2-s2.0-34248354759	2006	Simultaneous Determination of Trace Monochlorophenols in Water by Ion Chromatography Atmospheric Pressure Chemical Ionization Mass Spectrometry	A novel, sensitive, and accurate method has been successfully developed for the simultaneous determination of 3 monochlorophenols (MCPs) in drinking water samples by ion chromatography (IC) coupled with atmospheric pressure chemical ionization mass spectrometry in the negative mode. Drinking water was preconcentrated by solid-phase extraction (SPE). The IC separation was carried out with an IonPa…	No
2-s2.0-33749124757	2006	Partition of volatile organic compounds in activated sludge and wastewater	The Henryâ€™s law constant is important in the gas-liquid mass transfer process. Apparent dimensionless Henryâ€™s law constant, or the gas-liquid partition coefficient (Kâ€™H), for both hydrophilic (methanol, isopropyl alcohol, and acetone) and hydrophobic (toluene and p-xylene) organic compounds in deionized (DI) water, a wastewater with a maximum total dissolved organic carbon (DOC) content of …	No
2-s2.0-33750537067	2006	Biological responses to change in prehistoric Viet Nam	A bioarchaeological analysis of human remains from Con Co Ngua, a Da But culture period cemetery site in northern Viet Nam (n = 96), and an aggregated sample from 11 sites, mostly from the Red River delta region (n = 96) representing the emerging Metal period in the same region, is carried out. This study focuses on a range of skeletal and dental signatures of both health and behavior, including …	No
2-s2.0-30944450577	2006	Economic considerations for wastewater upgrading alternatives: An Israeli test case	Sewage effluent for land application is becoming an increasingly important source of irrigation water in many semi-arid regions of the world. Two main approaches to the use of sanitation to upgrade effluent for reuse in agriculture were analyzed: (i) sanitizing to the level required for each crop; or (ii) upgrading all effluent to the sanitary level mandated for unrestricted irrigation (<10 fecal…	No
2-s2.0-33646384980	2006	Panel discussion: remedy effectiveness: what works, what doesn't?	As contaminated sediment sites in freshwater and marine environments come under increasing scrutiny, and the importance of these sites with regard to ecological and human health is better understood, the number of contaminated sediment sites requiring risk characterization and management is increasing. Risk reduction must be the long-term goal of all sediment management practices. Risk management…	No
2-s2.0-33845451212	2006	Hydrodynamic control of the underwater light climate in fluvial Lac Saint-Pierre	We measured characteristics of the underwater light spectra (e.g., attenuation of ultraviolet [UV] radiation, photosynthetically active radiation) and select dissolved and particulate physicochemical properties (e.g., chromophoric dissolved organic carbon [CDOM], dissolved and particulate organic carbon, inorganic dry weights, beam attenuation coefficients, particulate absorption coefficients, an…	No
2-s2.0-36749071976	2006	A review of major storm impacts on coastal wetland elevations	Storms have long been recognized as agents of geomorphic change to coastal wetlands. A review of recent data on soil elevation dynamics before and after storms revealed that storms affected wetland elevations by storm surge, high winds, and freshwater flushing of the estuary (inferred). The data also indicate that measures of sediment deposition and erosion can often misrepresent the amount and e…	No
2-s2.0-34249021300	2006	How hurricane attributes determine the extent of environmental effects: Multiple hurricanes and different coastal systems	The most recent spate of hurricanes to strike the United States and Caribbean (1989 to the present) has occurred when many of the affected areas had long-term water quality and biological data collection efforts ongoing, as well as special follow-up studies. These data have allowed researchers to obtain a much clearer picture of how individual characteristics of hurricanes interact with human lan…	No
2-s2.0-33846398813	2006	Do toxic baits containing sodium fluroacetate (1080) affect fish and invertebrate communities when they fall into streams?	Large-scale control of Australian possums throughout New Zealand uses toxic cereal baits containing 1080 (sodium fluoroacetate). These baits are often aerially applied over rough terrain where ground application is impractical. Many small streams flow in these areas, so 1080 baits can potentially fall into them. The ecological effect of 1080 leaching from baits was assessed on freshwater fish and…	No
2-s2.0-33750202379	2006	Habitat structure associated with Borrelia burgdorferi prevalence in small mammals in New York State	The relationship between habitat structural composition, presence of Ixodes scapularis Say (I. dammini Spielman, Clifford, Piesman, and Corwin), and the prevalence of Borrelia burgdorferi infection in small mammal populations was studied at 12 4-ha study sites selected within two perpendicular transects spanning New York State. Species-adjusted small mammal infection rates (SARs) were calculated …	No
2-s2.0-31544445008	2006	Penicillium marneffei infection and recent advances in the epidemiology and molecular biology aspects	Penicillium marneffei infection is an important emerging public health problem, especially among patients infected with human immunodeficiency virus in the areas of endemicity in southeast Asia, India, and China. Within these regions, P. marneffei infection is regarded as an AIDS-defining illness, and the severity of the disease depends on the immunological status of the infected individual. Earl…	No
2-s2.0-33750392225	2006	New developments in exposure assessment: The impact on the practice of health risk assessment and epidemiological studies	The field of exposure assessment has matured significantly over the past 10-15 years. Dozens of studies have measured the concentrations of numerous chemicals in many media to which humans are exposed. Others have catalogued the various exposure pathways and identified typical values which can be used in the exposure calculations for the general population such as amount of water or soil ingested…	No
2-s2.0-33845286888	2006	An unusual koi herpesvirus associated with a mortality event of common carp Cyprinus carpio in New York State, USA	Koi herpesvirus (KHV), a highly contagious and lethal virus that affects both koi (Cyprinus carpio koi) and common carp (Cyprinus carpio), was isolated in 1998 from two outbreaks of koi suffering mass mortality in New York State, USA, and in Israel. The disease had been described as early as 1996 in Europe. In July 2004, this virus was found associated with a mass mortality event in wild common c…	No
2-s2.0-30144434413	2006	Recognition engines	New computer designs process networked streams of data for better spam and virus detection. In stream-processing application, a node might have links to many others, and each link would be assessed at the same time before a decision is made to move to the next state. Finite-state machines process data streams by matching each input character simultaneously against many different characters indica…	No
2-s2.0-33750688819	2006	Early visual sensory deficits as endophenotypes for schizophrenia: High-density electrical mapping in clinically unaffected first-degree relatives	Context: The imperative to establish so-called endophenotypes - quantifiable measures of risk for neurological dysfunction - is a growing focus of research in schizophrenia. Electrophysiological markers of sensory processing, observable in human event-related potentials, hold great promise in this regard, lying closer to underlying physiology than descriptive clinical diagnostic tests. Objective:…	No
2-s2.0-29644448028	2006	Trends of chlorinated organic contaminants in Great Lakes trout and walleye from 1970 to 1998	Levels of chlorinated organic contaminants in predator fish have been monitored annually in each of the Great Lakes since the 1970s. This article updates earlier reports with data from 1991 to 1998 for lake trout (Salvelinus namaycush) and (Lake Erie only) walleye (Sander vitreus) to provide a record that now extends nearly 30 years. Whole fish were analyzed for a number of industrial contaminant…	No
2-s2.0-33646193351	2006	Major advances in nutrition: Relevance to the sustainability of the dairy industry	The typical cow has a maintenance requirement of about 10 Mcal of net energy for lactation (NEL) per day. Each kilogram of milk takes an additional 0.7 Meal of NEL. Thus, the cow producing 45 kg of milk per day needs 4 times as much total energy as she needs for her maintenance requirement alone. The elite cow producing 90 kg/d needs 7 times as much total energy as she needs for maintenance alone…	No
2-s2.0-33344472167	2006	Molecular identification of Aeromonas and coliform bacteria isolated on m Endo media from Lake Erie waters	Bacteria from recreational waters collected from two Lake Erie beaches in Dunkirk, New York were plated onto m Endo LES media. The 16S rRNA gene was then amplified from coliform and non-coliform bacteria using the polymerase chain reaction. The PCR products were characterized by restriction fragment length polymorphism (RFLP) analysis. A total of 8 RFLP groups were identified from the analysis of…	No
2-s2.0-30144435554	2006	HIV-1 TAT represses transcription of the bone morphogenic protein receptor-2 in U937 monocytic cells	The bone morphogenetic protein receptor-2 (BMPR2) is a member of the transforming growth factor-Î² receptor family and is expressed on the surface of several cell types including endothelial cells and macrophages. Recently, a cause for familial primary pulmonary hypertension (FPPH) has been identified as mutations in the gene encoding BMPR2. Three forms of pulmonary hypertension (PH) exist, inclu…	No
2-s2.0-33645456964	2006	Mass and moisture distribution in aboveground components of standing corn plants	Corn stover mass and moisture properties were identified to aid decisions regarding collection of standing corn stover dry matter with least moisture, and to aid development of moisture prediction tools for applications including harvest, transport, size reduction, and storage. Vertical distributions of mass and moisture in standing stalks and aboveground components such as leaf, husk, and ear in…	No
2-s2.0-79960809113	2006	Efficient Remote Profiling for Resource-Constrained Devices	The widespread use of ubiquitous, mobile, and continuously connected computing agents has inspired software developers to change the way they test, debug, and optimize software. Users now play an active role in the software evolution cycle by dynamically providing valuable feedback about the execution of a program to developers. Software developers can use this information to isolate bugs in, mai…	No
2-s2.0-33747127083	2006	The mobility of Atlantic baric depressions leading to intense precipitation over Italy: A preliminary statistical analysis	The speed of Atlantic surface depressions, occurred during the autumn and winter seasons and that lead to intense precipitation over Italy from 1951 to 2000, was investigated. Italy was divided into 5 regions as documented in previous climatological studies (based on Principal Component Analysis). Intense precipitation events were selected on the basis of in situ rain gauge data and clustered acc…	No
2-s2.0-29344451971	2006	Plasma etching of HfO<inf>2</inf>at elevated temperatures in chlorine-based chemistry	Plasma etching of Hf O2 at an elevated temperature is investigated in chlorine-based plasmas. Thermodynamic studies are performed in order to determine the most appropriate plasma chemistry. The theoretical calculations show that chlorocarbon gas chemistries (such as C Cl4 or Cl2 -CO) can result in the chemical etching of Hf O2 in the 425-625 K temperature range by forming volatile effluents such…	No
2-s2.0-33646472936	2006	Epidemiological studies of Fasciola gigantica infections in cattle in the highveld and lowveld communal grazing areas of Zimbabwe	During the period between January 1999 and December 2000, the distribution and seasonal patterns of Fasciola gigantica infections in cattle in the highveld and lowveld communal grazing areas of Zimbabwe were determined through monthly coprological examination. Cattle faecal samples were collected from 12 and nine dipping sites in the highveld and lowveld communal grazing areas respectively. Patte…	No
2-s2.0-33749425229	2006	Factors influencing the occurrence and distribution of Corbicula fluminea (Müller, 1774) in the River Lima estuary	This study evaluated the status of the Asian clam Corbicula fluminea (MÃ¼ller, 1774) in the River Lima estuary (Portugal), which it first invaded in 2002. During the summers of 2004 and 2005, spatial and temporal variations in the abundance, biomass and population structure of C. fluminea were investigated in this estuary. This species was present in a limited intertidal area of the estuary and w…	No
2-s2.0-33846112248	2006	Paleomagnetism and petrophysics of the Jänisjärvi impact structure, Russian Karelia	Paleomagnetic, rock magnetic, and petrophysical results are presented for impactites and target rocks from the Lake JÃ¤nisjÃ¤rvi impact structure, Russian Karelia. The impactites (tagamites, suevites, and lithic breccias) are characterized by increased porosity and magnetization, which is in agreement with observations performed at other impact structures. Thermomagnetic, hysteresis, and scanning…	No
2-s2.0-36148992945	2006	The effect and the toxicity of Iranian oil dispersant (Pars 1) on rainbow trout	Dispersants are oil spill response chemicals that are used to disperse floating oil in the water column. In this study the new oil dispersant Pars 1, which was produced by the Iranian Oil Company, was examined on 28-32 g rainbow trout. 96 hours acute toxicity of oil dispersant by itself and oil and dispersant combinations were tested in various concentrations. For each dose of experiment three tr…	No
2-s2.0-84974598902	2006	Investigation of anthropogenic trace metals in sediments of Lake Illawarra, New South Wales	Surficial (<2cm) and subsurface (cores 20â€“50cm deep) sediments from Lake Illawarra were analysed for trace metals (Cd, Cu, Pb, Zn) to determine the extent and nature of anthropogenic influence. Sediment samples were size-normalised (<62.5Î¼m) to determine total acid-extractable metals in the fine fraction, as well as in whole sediment. A four-step sequential extraction technique was used to det…	No
2-s2.0-29144457479	2006	Travel time and trajectory moments of conservative solutes in two-dimensional convergent flows	We address advective transport of a solute traveling toward a single pumping well in a two-dimensional randomly heterogeneous aquifer. The two random variables of interest are the trajectory followed by an individual particle from the injection point to the well location and the particle travel time under steady-state conditions. Our main objective is to derive the predictors of trajectory and tr…	No
2-s2.0-33644772780	2006	Impact of chemically enhanced diffusion on dissolved inorganic carbon stable isotopes in a fertilized lake	At high pH the chemical reaction of CO2 with OH- can significantly increase the mass transfer of CO2 between air and water. The reaction of CO2 with OH- strongly fractionates carbon isotopes in comparison to simple diffusion. These processes, chemically enhanced diffusion (CED) and chemically enhanced fractionation (CEF), greatly influence the carbon budgets and carbon isotope ratios for water bo…	No
2-s2.0-30144445497	2006	A novel and selective spectral method for the determination of trace chlorine in water basing on the resonance scattering effect of rhodamine B-I3 association nanoparticles	In Na2HPO4-citric acid buffer solution, Cl 2 can oxidize I- to form I2 and then it reacts with excess I- to form I3 -. The I 3 - combines respectively with rhodamine dyes, including rhodamine B (RhB), butyl rhodamine B (b-RhB), rhodamine 6G (RhG) and rhodamine S (RhS), to form association particles which give stronger resonance scattering (RS) effect at 400 nm. The RS intensity of the RhB, b-RhB,…	No
2-s2.0-31144453667	2006	Assessment of pathogens and toxicants in New Orleans, LA following Hurricane Katrina	Storm surge associated with Hurricane Katrina and the breach of levees protecting New Orleans, Louisiana allowed floodwaters from Lake Pontchartrain to inundate 80% of the city. Environmental samples were collected during September 16-18, 2005 to determine immediate human and wildlife health hazards from pathogens and toxicants in the floodwaters. Baseline information on potential long-term envir…	No
2-s2.0-30144434179	2006	Use of broad-spectrum antimicrobials for the treatment of pneumonia in seriously ill patients: Maximizing clinical outcomes and minimizing selection of resistant organisms	Among various risk factors for death among critically ill patients with serious infection, inappropriate antimicrobial therapy is an important factor that clinicians can modify directly. The presence of multidrug-resistant bacteria is the primary reason that patients with ventilator-associated pneumonia receive inappropriate antimicrobial therapy. Empirical antimicrobial therapy for ventilator-as…	No
2-s2.0-29544440020	2006	Magnetite dissolution, diachronous greigite formation, and secondary magnetizations from pyrite oxidation: Unravelling complex magnetizations in Neogene marine sediments from New Zealand	Detailed rock magnetic and electron microscope analyses indicate that the magnetic signature of Neogene marine sediments from the east coast of New Zealand is dominated by the authigenic iron sulphide greigite. The greigite is present as a mixed population of stable single domain and superparamagnetic grains, which is consistent with authigenic growth from solution. This growth can result from py…	No
2-s2.0-30344475193	2006	Seismic imaging of the transitional crust across the northeastern margin of the South China Sea	Crustal structure across the passive continental margin of the northeastern South China Sea (SCS) is presented based on a deep seismic survey cooperated between Taiwan and China in August 2001. Reflection data collected from a 48-hydrophone streamer and the vertical component of refraction/reflection data recorded at 11 ocean-bottom seismometers along a NW-SE profile are integrated to image the u…	No
2-s2.0-31144461905	2006	Watershed-based sources of polycyclic aromatic hydrocarbons in urban storm water	Polycyclic aromatic hydrocarbons (PAHs) are carcinogenic and mutagenic compounds, ubiquitous in the air and water of urban environments, and have been shown to accumulate in coastal estuarine and marine sediments. Although previous studies have documented concentrations and loads of PAHs in urban runoff, little is known about the sources and temporal patterns of PAH loading from storm water. This…	No
2-s2.0-33645553613	2006	The myxozoan fauna of Fundulus diaphanus (cyprinodontidae) from freshwater localities in Eastern North America: Prevalence, community structure, and geographic distribution	Membership and richness of infracommunities and component communities of myxozoan fauna of the banded killitish (Fundulus diaphanus) from freshwater localities in Ontario, Quebec, New York State, New Brunswick, Nova Scotia, and Maryland were studied. Five species of parasites were found: Myxobolus diaphanus (Fantham, Porter, and Richardson, 1940) (connective tissue throughout the body and head), …	No
2-s2.0-31744444069	2006	Trace determination of 1-aminopropanone, a potential marker for wastewater contamination by liquid chromatography and atmospheric pressure chemical ionization-mass spectrometry	1-Aminopropanone (APR) is a volatile aminoketone of human origin that has been identified in raw sewage and surface waters. However, the traditional methodology for the determination of APR is extremely complicated and requires a skilled chemist to achieve consistent results. This investigation presents a novel and simple method for the analysis of APR by direct derivatization in aqueous media. A…	No
2-s2.0-32544453860	2006	Biofilm growth and characteristics in an alternating pumped sequencing batch biofilm reactor (APSBBR)	A novel biofilm reactor - alternating pumped sequencing batch biofilm reactor (APSBBR) - was developed to treat synthetic dairy wastewater at a volumetric chemical oxygen demand (COD) loading rate of 487 g COD m-3 d-1 and an areal loading rate of 5.4 g COD m-2 d -1. This biofilm reactor comprised two tanks, Tanks 1 and 2, with two identical plastic biofilm modules in each tank. The maximum volume…	No
2-s2.0-31544475200	2006	Survival of Lost River suckers (Deltistes luxatus) challenged with Flavobacterium columnare during exposure to sublethal ammonia concentrations at pH 9.5	The Lost River sucker (Deltistes luxatus) is a federally listed, endangered species inhabiting the hypereutrophic waters of Upper Klamath Lake in southern Oregon, USA. High pH (â‰¥10) and elevated ammonia concentrations (â‰¥1 mg NH3-N/L) often occur during blooms of cyanobacteria (Aphanizomenon flos-aquae) in the lake, with major fish kills sometimes following a mid- or late-summer \crash\" of th…	No
2-s2.0-30344438503	2006	Citalopram counteracts depressive-like symptoms evoked by chronic social stress in rats	Recently, we have described a new model of chronic social stress in rats, based on the resident-intruder paradigm. In this model, rats show behavioural changes that may be considered correlates of depressive symptoms, such as anhedonia and motivational deficits. The present study was designed for pharmacological validation of this model. Animals were socially stressed for 5 weeks and, in parallel…	No
2-s2.0-32444438519	2006	The genome sequence of the obligately chemolithoautotrophic, facultatively anaerobic bacterium Thiobacillus denitrificans	The complete genome sequence of Thiobacillus denitrificans ATCC 25259 is the first to become available for an obligately chemolithoautotrophic, sulfur-compound-oxidizing, Î²-proteobacterium. Analysis of the 2,909,809-bp genome will facilitate our molecular and biochemical understanding of the unusual metabolic repertoire of this bacterium, including its ability to couple denitrification to sulfur…	No
2-s2.0-31944441546	2006	Investigation of a modified sequential iteration approach for solving coupled reactive transport problems	When contaminants enter the soil or groundwater, they may interact physically, geochemically and biochemically with the native water, microorganisms and solid matrix. A realistic description of a reactive transport regime that includes these processes requires joint consideration of multiple chemical species. Currently there are three common numerical approaches for coupling multispecies reaction…	No
2-s2.0-31144454639	2006	Competitive adsorption of dye metanil yellow and RB15 in acid solutions on chemically cross-linked chitosan beads	One kind of adsorbent with a high adsorption capacity for anionic dyes was prepared using ionically and chemically cross-linked chitosan beads. A batch system was applied to study the adsorption behavior of one acid dye (MY, metanil yellow) and one reactive dye (RB15, reactive blue 15) in aqueous solutions by the cross-linked chitosan beads. The adsorption capacities was 3.56 mmol g -1 (1334 mg g…	No
2-s2.0-31144461779	2006	Treatment of dilute wastewaters using a novel submerged anaerobic membrane bioreactor	Three 3L laboratory scale submerged anaerobic membrane bioreactors (SAMBRs) with in situ membrane cleaning due to the bubbling of recycled biogas underneath them were studied for their ability to treat dilute wastewaters. Both Mitsubishi Rayon hollow-fiber and Kubota flat sheet membranes made of polyethylene with a pore size of 0.4Î¼m were used in this study, and the effect of different substrate…	No
2-s2.0-31944449257	2006	Plant species and temperature effects on the k-C* first-order model for COD removal in batch-loaded SSF wetlands	The modified k-C* first-order degradation model proposed by Kadlec and Knight [Kadlec, R.H., Knight, R.L., 1996. Treatment Wetlands. Lewis Publishers, Boca Raton, FL] was fit to 192 data sets of COD concentration versus time measured in batch-loaded wetland microcosms. The time series sets were divided into four replicates of four plant species treatments; Carex utriculata (sedge), Schoenoplectus…	No
2-s2.0-33745276495	2006	Clay mineral and textural variations in the sediments of Chandragiri River, estuary and shallow marine realms off Kasaragod, Kerala	X-ray diffraction and textural studies were carried out on 25 surficial sediments collected from Chandragiri River, estuary and shallow marine areas off the river located in Kasaragod district, Kerala for understanding the provenance of the clay minerals. The riverine sediments are dominated by sandy silt to silty sand, whereas the estuarine sediments consist of clayey silt to silty sand and the …	No
2-s2.0-33645231654	2006	Modulation of tropical intraseasonal oscillations by ocean-atmosphere coupling	The impact of ocean-atmosphere coupling on the structure and propagation characteristics of 30-60-day tropical intraseasonal oscillations (TISOs) is investigated by analyzing long-term simulations of the Meteorological Research Institute coupled general circulation model (CGCM) and its stand-alone atmospheric general circulation model (AGCM) version forced with SSTs derived from the CGCM and comp…	No
2-s2.0-33644635121	2006	Notch signaling in astrocytes and neuroblasts of the adult subventricular zone in health and after cortical injury	The postnatal subventricular zone (SVZ) is a niche for continuous neurogenesis in the adult brain and likely plays a fundamental role in self-repair responses in neurodegenerative conditions. Maintenance of the pool of neural stem cells within this area depends on cell-cell communication such as that provided by the Notch signaling pathway. Notch1 receptor mRNA has been found distributed in diffe…	No
2-s2.0-32844461025	2006	Surface treatment and characterization: Perspectives to electrophoresis and lab-on-chips	The control and modification of surface state is a major challenge in bioanalytical sciences, and in particular in electrokinetic separation methods, due to the importance of electroosmosis. This topic has gained recently a renewed interest, associated with the development of \lab-on-chips\" systems that extend the range of materials in which separation channels are fabricated. The surface scienc…	No
2-s2.0-28844473972	2006	Hydrochemical-isotopic tendencies to define hydraulic mobility of formation water at the Samaria-Sitio Grande oil field, Mexico	The chemical (major elements) and isotopic (2H, 3H, 13C,18O) composition of formation water is presented for the Sitio Grande oilfield, SE-Mexico, extracted from 28 production wells from the carbonate reservoir at a depth between 3585 and 4545 m.b.s.l. The linear Î´18O/Î´D-trend explains the formation of reservoir water as part of three subsequent stages: a) the evaporation of marine water at the…	No
2-s2.0-33645064000	2006	Sulphonamide residues in Italian surface and drinking waters: A small scale reconnaissance	The occurrence of antibiotics in the aquatic environment is an important emerging issue due to potential adverse effect of these compounds on ecosystem and human health. For a correct environmental risk assessment there is a need for appropriate analytical methods for monitoring antibiotic residues in a variety of water matrices. This paper describes a method for the determination of eleven sulph…	No
2-s2.0-33644937843	2006	Effects of legacy nuclear waste on the compositional diversity and distributions of sulfate-reducing bacteria in a terrestrial subsurface aquifer	The impact of legacy nuclear waste on the compositional diversity and distribution of sulfate-reducing bacteria in a heavily contaminated subsurface aquifer was examined. dsrAB clone libraries were constructed and restriction fragment length polymorphism (RFLP) analysis used to evaluate genetic variation between sampling wells. Principal component analysis identified nickel, nitrate, technetium, …	No
2-s2.0-33645552692	2006	Characteristics of immobilized PVA beads in nitrate removal	Before applying PVA bio-beads to practical biological treatment of nitrate-containing wastewater, their characteristics were examined. PVA bio-beads could steadily. produce nitrogen gas from nitrate for 28 batches with 0.04 ml/l/h of the maximum gas production rate; however, the maximum gas production rate dropped remarkably thereafter with apparent deformation of beads. Addition of 2.2% solution…	No
2-s2.0-33646180622	2006	Molecular epidemiologic investigation of tuberculosis in an area of increasing incidence in inner-city Dublin	In 2002 the tuberculosis (TB) incidence in Dublin was 13.1 cases per 100,000 persons. In inner city Dublin, the TB incidence was >20 per 100,000 persons. TB notification rates have remained elevated. The objective of the study is to characterize the population affected in this inner city area and to investigate transmission patterns and potential risk factors for TB disease. This hospital-based m…	No
2-s2.0-33750689526	2006	Virological investigation on aerosol from waste depuration plants	Aerosol from activated mud decontamination plants used for the treatment of urban sewage can represent a vehicle for bacteria, virus and fungi. As a result, they become an infective hazard for plant personnel, the general population residing in the surrounding area and the occasional visitor. The present investigation focuses on the identification of enteric-type viruses in this kind of aerosol. …	No
2-s2.0-33645301289	2006	Inducible nickel resistance in a river isolate of India phylogenetically ascertained as a novel strain of Acinetobacter junii	A gram negative, motile, short rod-shaped, and nickel resistant (tolerating 6.5 mM Ni2+) bacterium, strain BB1A, was isolated from the waters of the River Torsa in Hashimara, Jalpaiguri district, West Bengal, India. The isolate BB1A was identified as a strain of Acinetobacter junii following detailed analysis of morphological, physio-biochemical and 16S rRNA gene sequence. The expression of nicke…	No
2-s2.0-33645568340	2006	A simple model to predict compound loss processes in aquatic ecotoxicological tests: Calculated and measured triphenyltin levels in water and biota	A new simple model, based on the fugacity approach, has been developed to provide a predictive tool useful in the planning phase of aquatic ecotoxicological tests for assessing the actual daily concentrations in water. In our experiments, three nominal concentrations (100, 225, and 500 ng L -1) of triphenyltin chloride (TPT-Cl) were employed for an exposure period of 28 days in 50 L aquaria with …	No
2-s2.0-33644995537	2006	Investigation of evaporation and biodegradation of fuel spills in Antarctica: II-Extent of natural attenuation at Casey Station	In many temperate regions, fuel and oil spills are sometimes managed simply by allowing natural degradation to occur, while monitoring soils and groundwater to ensure that there is no off-site migration or on-site impact. To critically assess whether this approach is suitable for coastal Antarctic sites, we investigated the extent of evaporation and biodegradation at three old fuel spills at Case…	No
2-s2.0-28844490449	2006	Recent evolutions of imagery in fluid mechanics: From standard tomographic visualization to 3D volumic velocimetry	The recent evolutions of the optical analysis of three-dimensional (3D) flows by means of light scattering and quantitative imagery are presented. In order to remove the intrinsic ambiguity of the well-known tomographic methods (how to obtain 3D information by using a 2D plane illumination?), the efficiency of polychromatic lightings is shown: the basic idea is to code the third dimension by the …	No
2-s2.0-33645366436	2006	What makes a good anti-inflammatory drug target?	This review focuses on the major, 'successful' target families in inflammation and attempts to identify some of the key features of what makes a good anti-inflammatory target. The review is based on a systematic analysis of approved anti-inflammatory drugs grouped according to their drug-target family. The cytokine family is a drug-dense area. They have yielded and continue to yield a rich stream…	No
2-s2.0-33144462919	2006	Population affinities of neolithic Siberians: A snapshot from prehistoric Lake Baikal	Archaeological evidence supports the inhabitation of the Lake Baikal region since the Paleolithic. Both metric and nonmetric osteological studies suggest that Neolithic Cis-Baikal populations are the ancestors of contemporary inhabitants of the region. To date, ancient DNA data have not been used to corroborate this biological continuity hypothesis. This study presents a temporal snapshot of the …	No
2-s2.0-33645240280	2006	Dating paleochannel iron ore by (U-Th)/He analysis of supergene goethite, Hamersley province, Australia	(U-Th)/He dating of late-stage authigenic goethite, combined with corrections for diffusive loss of 4He by the 4He/3He methodology, reveals strong correlation between a sample's age and its depth in ferruginized channel sediments from the Yandicoogina deposit, Western Australia. Corrected ages, ranging from ca. 18 Ma near the surface to ca. 5 Ma at the bottom of the profile, indicate that ferrugi…	No
2-s2.0-33645641427	2006	Association of Cryptosporidium with bovine faecal particles and implications for risk reduction by settling within water supply reservoirs	Artificial cow pats were seeded with Cryptosporidium oocysts and subjected to a simulated rainfall event. The runoff from the faecal pat was collected and different particle size fractions were collected within settling columns by exploiting the size-dependent settling velocities. Particle size and Cryptosporidium concentration distribution at 10 cm below the surface was measured at regular inter…	No
2-s2.0-33646029095	2006	Effect of membrane charge on flow and protein transport during ultrafiltration	Although several recent studies have demonstrated the importance of electrostatic interactions in ultrafiltration, there have been few quantitative studies of the effects of membrane charge density on protein transport and membrane hydraulic permeability. Data were obtained using a series of charge-modified cellulose membranes, with the surface charge density controlled by varying the extent of a…	No
2-s2.0-33646244767	2006	Mathematically modelling the effects of counting factor in Dictyostelium discoideum	Size regulation is a crucial feature in many biological systems, with misregulation leading to dysplasia or hyperplasia. The recent discovery of counting factor (CF) in Dictyostelium discoideum will lead to a greater understanding of how the system regulates the size of a group of cells. In this paper we mathematically model the known effects of CF using two different models: a cellular automata …	No
2-s2.0-33746929485	2006	Efficiency of Bauxsol™ in permeable reactive barriers to treat acid rock drainage	Permeable reactive barriers (PRBs) and flow-through reaction cells are fairly new passive treatment alternatives to conventional lime treatment of acidic rock drainage (ARD). They are ideal for the treatment of flowing ARD and are particularly useful when contaminants are likely to persist for several years. This paper describes column tests performed to simulate a PRB constructed using Bauxsolâ„…	No
2-s2.0-33845274329	2006	Intercropping time of corn (Zea mays) in the establishment of leucaena (Leucaena leucocephala)-guinea grass (Panicum maximum)	An experiment was undertaken to study the time of intercropping corn (Zea mays) after the sowing of a silvopastoral system leucaena (Leucaena leucocephala cv Peru)-guinea grass (Panicum maximum cv Likoni). A random block design was used with 5 replicates. The treatments consisted of leucaena-guinea grass intercropped with com at 15 and 40 d after the emergence of leucaena-guinea grass and leucaen…	No
2-s2.0-33746919506	2006	Three layer functional model and energy exchange concept of aging process	Relying on a certain degree of abstraction, we can propose that no particular distinction exists between animate or living matter and inanimate matter. While focusing attention on some specifics, the dividing line between the two can be drawn. The most apparent distinction is in the level of structural and functional organization with the dissimilar streams of 'energy flow' between the observed e…	No
2-s2.0-33646256346	2006	A diagnostic study of a retreating mei-yu front and the accompanying low-level jet formation and intensification	During 7-8 June 1998, an organized mesoscale convective system (MCS) formed within the mei-yu frontal cloud band and moved northeastward to produce heavy rain over the island of Taiwan. During this period, the section of the mei-yu front east of Taiwan moved northward, most significantly for about 300 km over 12 h. Meanwhile, a low-level jet (LLJ) developed within the environmental southwesterly …	No
2-s2.0-31044447237	2006	Coarse and accumulation mode particles associated with Asian dust in southwestern Japan	Number and mass concentrations of atmospheric particles were measured at a surface site on the southwestern Japan coast from March to May 2002. Particles were collected when Asian dust appeared at the site in this period, and later characterized with their morphology and elemental composition from electron microscopic analysis. The mass concentration of suspended particulate matters with diameter…	No
2-s2.0-30944443553	2006	Bio-hydrogen production from waste materials	Hydrogen is a valuable gas as a clean energy source and as feedstock for some industries. Therefore, demand on hydrogen production has increased considerably in recent years. Electrolysis of water, steam reforming of hydrocarbons and auto-thermal processes are well-known methods for hydrogen gas production, but not cost-effective due to high energy requirements. Biological production of hydrogen …	No
2-s2.0-33646367155	2006	Paleoseismic evidence of great surface rupture earthquakes along the Indian Himalaya	Toward understanding the relationship between strain accumulation and strain release in the context of the mechanics of the earthquake and mountain building process and quantifying the seismic hazard associated with the globes largest continental thrust system, we describe the late Quaternary expression and paleoseismic evidence for great surface rupture earthquakes at six sites along the Himalay…	No
2-s2.0-33644623792	2006	On-line supervision and control of an aerobic SBR process	This paper presents a new software developed in MATLAB for analyzing on-line data of an aerobic SBR, detecting faults and, in this case, proposing the most probable causes of fault. Process diagnosis is achieved using a statistical method divided in two main phases: off-line model building and on-line data diagnosis. The off-line model identifies the correct working conditions of the system (stan…	No
2-s2.0-33644865958	2006	Stratified prokaryote network in the oxic-anoxic transition of a deep-sea halocline	The chemical composition of the Bannock basin has been studied in some detail1,2. We recently showed that unusual microbial populations, including a new division of Archaea (MSBL1)3, inhabit the NaCl-rich hypersaline brine. High salinities tend to reduce biodiversity4, but when brines come into contact with fresher water the natural haloclines formed frequently contain gradients of other chemical…	No
2-s2.0-33644638021	2006	Streamlined approach to the crude compound purification to assay process	Purification of medicinal chemistry compounds is often the slow step in the drug-discovery process, particularly for compounds generated through parallel synthesis. To address this bottleneck we have developed a fully automated purification platform using a preparative-LC/MS with a customized compound analysis requestor and a data tracking-handling program. The six workstations that comprise the …	No
2-s2.0-33644901764	2006	A ratiometric approach for pH optosensing with a single fluorophore indicator	A new fiber-optic prototype of luminometer has been designed in order to perform ratiometric-based measurements for optical sensing purposes. The coupling of a pH-selective sensing phase to the fiber-optic prototype has been evaluated for robust pH optosensing in drinking water. The pH-sensitive material has been synthesized by entrapping a pH-sensitive luminescent indicator (mercurochrome) in a …	No
2-s2.0-33244482205	2006	Karst groundwater protection: First application of a Pan-European Approach to vulnerability, hazard and risk mapping in the Sierra de Líbar (Southern Spain)	The European COST action 620 proposed a comprehensive approach to karst groundwater protection, comprising methods of intrinsic and specific vulnerability mapping, validation of vulnerability maps, hazard and risk mapping. This paper presents the first application of all components of this Pan-European Approach to the Sierra de LÃ­bar, a karst hydrogeology system in Andalusia, Spain. The intrinsi…	No
2-s2.0-33645745236	2006	Sources of priority substances entering an urban wastewater catchment-trace organic chemicals	The implementation of new legislation such as the Water Framework Directive (WFD) requires Member States to gain a better understanding of priority substances entering surface waters. This will include inputs from wastewater treatment works as well as from other urban, industrial and agricultural sources. There is currently a lack of available data regarding the magnitude and sources of organic p…	No
2-s2.0-30944437078	2006	Algae and UV irradiation: Effects on ultrastructure and related metabolic functions	The effects of ultraviolet radiation in the biological relevant wavebands of UV-A (315-400 nm) and UV-B (280-315 nm) on algae have become an important issue as a man-made depletion of the protecting ozone layer has been reported. However, experimental designs to investigate this issue are manifold and the target organisms are extremely diverse. Data are included from the prokaryotic cyanobacteria…	No
2-s2.0-33646187915	2006	Sandarakinorhabdus limnophila gen. nov., sp. nov., a novel bacteriochlorophyll a-containing, obligately aerobic bacterium isolated from freshwater lakes	Three strains (so36, so42T and wo26) representing a novel Gram-negative, obligately aerobic, bacteriochlorophyll a-containing species of the Î±-4 subgroup of the Proteobacteria were isolated from freshwater lakes using a high-throughput cultivation technique. The non-motile and slender rod-shaped cells formed orange-red-pigmented colonies. The main carotenoids were nostoxanthin and keto-nostoxant…	Yes, the three strains represent a new genus and species, for which the name Sandarakinorhabdus limnophila gen. nov., sp. nov., is proposed, with strain so42T (=DSM 17366T=CECT 7086T) as the designated type strain.
2-s2.0-33748872660	2006	Proteorhodopsin - A new path for biological utilization of light energy in the sea	The breakthrough of environmental genomics of marine microbes has revealed the existence of eubacterial rhodopsin in the sea, named proteorhodopsin (PR), which can take light to produce bio-energy for cell metabolism. Gene and protein sequence analysis and laser flash-induced photolysis experiments have validated the function of PR as light-driven proton-pump. During the pumping process, light en…	No
2-s2.0-33745081604	2006	Anaerobic degradability: Effect of particulate COD	Batch bioassay tests were conducted to evaluate the effect of particulate chemical oxygen demand (COD) (CODP) on anaerobic digestion of wastewater at different ratio of food to microorganism (F/ M). Synthetically prepared soluble and complex wastewaters were used. Experiments were conducted in seven sets of serum bottles maintained at F/M ranging from 0.18 to 2.0. Each set contained six bottles h…	No
2-s2.0-33645744010	2006	A review of carbon nanotube toxicity and assessment of potential occupational and environmental health risks	Nanotechnology has emerged at the forefront of science research and technology development. Carbon nanotubes (CNTs) are major building blocks of this new technology. They possess unique electrical, mechanical, and thermal properties, with potential wide applications in the electronics, computer, aerospace, and other industries. CNTs exist in two forms, single-wall (SWCNTs) and multi-wall (MWCNTs)…	No
2-s2.0-33646854704	2006	Isolation and characterization of halophilic archaea able to grow in aromatic compounds	Benzoic acid and its hydroxylated derivatives are naturally occurring compounds that are also released into the environment in large amounts through industrial wastewater, automobile exhaust and tobacco smoke. Even though these compounds are readily degraded under mild environmental conditions, little is known about their metabolism in extreme environments such as hypersaline lakes. Five hypersal…	Yes, Forty-four new halophilic archaea able to grow in p-hydroxybenzoic acid (0.4 mM) as the sole carbon and energy source were isolated
2-s2.0-33645897660	2006	Evaluating spectroscopic and chromatographic techniques to resolve dissolved organic matter via end member mixing analysis	Real-time or near real-time in-situ monitoring of dissolved organic matter (DOM) composition in natural waters and engineered treatment systems provides critical information to water quality scientists and engineers, particularly when the monitoring techniques can provide some information about the chemical nature of DOM. The efficacy of various indices derived from rapid, low-cost spectroscopic …	No
2-s2.0-33645720958	2006	Association between glycogen synthase kinase-3? genetic polymorphism and late-onset Alzheimer's disease	Aberrant phosphorylated tau is the major component of the neurofibrillary tangles in Alzheimer's disease (AD) brains. Glycogen synthase kinase-3Î² (GSK-3Î²) phosphorylates tau protein, and increased GSK-3Î² expression has been associated with neurofibrillary tangles. Saitohin (STH) is a recently identified protein that shares tissue expression pattern with tau, and previous evidence in the Spanis…	No
2-s2.0-33645915758	2006	Multiple magnetization events in the Red River carbonates, Williston Basin, Canada: Evidence for fluid-flow?	Samples collected from the Upper Ordovician Red River carbonates in a well at the centre of the Williston Basin revealed two paleomagnetic components with different inclinations, 60.3 Â± 3.9Â° (k = 70.7, N = 12) and 20.4 Â± 3.3Â° (k = 141.2, N = 8), but similar declination values in individual specimens. Inclination-only analysis indicates two possible scenarios for the age of these two magnetiza…	No
2-s2.0-33646071873	2006	Fermentative hydrogen production and bacterial community structure in high-rate anaerobic bioreactors containing silicone-immobilized and self-flocculated sludge	A novel continuously stirred anaerobic bioreactor (CSABR) seeded with silicone-immobilized sludge was developed for high-rate fermentative H 2 production using sucrose as the limiting substrate. The CSABR system was operated at a hydraulic retention time (HRT) of 0.5-6 h and an influent sucrose concentration of 10-40 g COD/L. With a high feeding sucrose concentration (i.e., 30-40 g COD/L) and a s…	No
2-s2.0-33645326497	2006	Benthic foraminiferal distributions in Chilean fjords: 47°S to 54°S	Surface sediment samples collected from the fjord region of southern Chile (47Â° to 54Â° South) were analyzed for benthic foraminifera. A total of 175 species were identified including agglutinated and calcareous benthic taxa. Hierarchical cluster analysis of the foraminiferal data resulted in the recognition of three distinct biofacies: inner-fjord, intermediate fjord and channel, and oceanic bi…	No
2-s2.0-33645857358	2006	The dark side of the universe	I will begin by reviewing the evidence for dark matter in the Universe, as well as the candidates for dark matter. At most 20% of the dark matter in galaxies can be in the form of MACHOs (Massive Compact Halo Objects); the remainder appears to be some unknown exotic component. The most sensible candidates from the point of view of particle physics are axions and WIMPs (Weakly Interacting Massive …	No
2-s2.0-33645840476	2006	The functional neuroanatomy of working memory: Contributions of human brain lesion studies	Studies of patients with focal brain lesions remain critical components of research programs attempting to understand human brain function. Whereas functional imaging typically reveals activity in distributed brain regions that are involved in a task, lesion studies can define which of these brain regions are necessary for a cognitive process. Further, lesion studies are less critical regarding t…	No
2-s2.0-33645942762	2006	Constructed wetlands: Treatment of concentrated storm water runoff (Part A)	The aim of this research was to assess the treatment efficiencies for gully pot liquor of experimental vertical-flow constructed wetland filters containing Phragmites australis (Cav.) Trin. ex Steud. (common reed) and filter media of different adsorption capacities. Six out of 12 filters received inflow water spiked with metals. For 2 years, hydrated nickel and copper nitrate were added to sieved…	No
2-s2.0-33646017364	2006	A multispecies study to assess the toxic and genotoxic effect of pharmaceuticals: Furosemide and its photoproduct	Pharmaceutical products for humans and animals, as well as their related metabolites end up in the aquatic environment after use. Recent investigations show that concentrations of pharmaceuticals are detectable in the order of ng/l-Î¼g/l in municipal wastewater, groundwater and also drinking water. Little is known about the effects, and the hazard of long-term exposure to low concentrations of ph…	No
2-s2.0-33645405838	2006	Applying integrated urban water management concepts: A review of Australian experience	This article explores recent Australian experiences in the application of the concept of integrated urban water management (IUWM) to land development sites through the review of 15 case studies. It discusses IUWM's emergence and comments on the success or otherwise of Australian experience in its application. The understanding of IUWM is maturing within the Australian water industry, an occurrenc…	No
2-s2.0-33646078359	2006	Monitoring of environmental fingerprints of alcohol ethoxylates in Europe and Canada	Recent improvements in methodology for the determination of alcohol ethoxylates (AE) in effluents now enable measurement of the full range of AE components, at ng/L levels, in the same analysis. This approach was deployed in effluent monitoring of biofilm and activated sludge wastewater treatment plants from Europe ( n = 12) and Canada ( n = 8) receiving predominantly municipal effluent. Individu…	No
2-s2.0-33745589246	2006	Responses of two New Hampshire (USA) lakes to human impacts in recent centuries	This study contrasts the effects of human disturbances on two very different lake/catchment systems: Hatch Pond and Beaver Lake, New Hampshire. Hatch is in a steep mountain catchment remote from urban/industrial centers, and is a small, relatively deep, primarily seepage lake with moderate flushing rate. The catchment has been continuously forested, but disturbed by partial loggings and a forest …	No
2-s2.0-34247622628	2006	Modeling the impact of clustered septic tank systems on groundwater quality	Contamination of groundwater from onsite disposal of septic tank effluent is an increasing concern. In this study, HYDRUS-2D simulated the impact of clustered disposal systems on NO3 - and fecal coliforms in groundwater in a rural community near Christchurch, New Zealand. The model included nine disposal boulder pits, embedded 4 m below the surface in alluvial gravel media, in a domain of 3.3 km …	No
2-s2.0-33748633485	2006	Phytoremediation of heavy metals from industrial wastewater by using indigenous biomaterial	Lead (II) and chromium (VI) are one of the highly toxic ions released into the environment from leather processing and chrome plating industries. There are number of methods available for the removal of Pb (II) and Cr (VI) from the industrial wastewater. However, most of the conventional methods generate secondary effluent impacts on the recipient environment. In recent years, cyanobacteria and o…	No
2-s2.0-33646584137	2006	Unexpected diversity and complexity of the Guerrero Negro hypersaline microbial mat	We applied nucleic acid-based molecular methods, combined with estimates of biomass (ATP), pigments, and microelectrode measurements of chemical gradients, to map microbial diversity vertically on a millimeter scale in a hypersaline microbial mat from Guerrero Negro, Baja California Sur, Mexico. To identify the constituents of the mat, small-subunit rRNA genes were amplified by PCR from community…	No
2-s2.0-33645576518	2006	Mercury in fish scales as an assessment method for predicting muscle tissue mercury concentrations in largemouth bass	The relationship between total mercury (Hg) concentration in fish scales and in tissues of largemouth bass (Micropterus salmoides) from 20 freshwater sites was developed and evaluated to determine whether scale analysis would allow a nonlethal and convenient method for predicting Hg concentrations in tissues. The relationship between total Hg concentration in untreated scale samples and muscle ti…	No
2-s2.0-33646436178	2006	Ectoenzymatic activity and its relationship to chlorophyll-a and bacteria in the Gulf of Genoa (Ligurian Sea, NW Mediterranean)	Three oceanographic campaigns were carried out in the Gulf of Genoa, Ligurian Sea (NW Mediterranean), during summer 2002 and spring and late autumn 2003, to study organic matter production (reflected in chlorophyll-a concentrations) and recycling (assessed by means of ectoenzymatic activity evaluations and bacterial abundance and biomass determinations) in the water column down to about 1000 m. T…	No
2-s2.0-33745131044	2006	Quantitative and qualitative aspects of dissolved organic carbon leached from senescent plants in an oligotrophic wetland	We conducted a series of experiments whereby dissolved organic matter (DOM) was leached from various wetland and estuarine plants, namely sawgrass (Cladium jamaicense), spikerush (Eleocharis cellulosa), red mangrove (Rhizophora mangle), cattail (Typha domingensis), periphyton (dry and wet mat), and a seagrass (turtle grass; Thalassia testudinum). All are abundant in the Florida Coastal Everglades…	No
2-s2.0-33646710437	2006	Climate and ocean variability during the middle and late Holocene recorded in laminated sediments from Alfonso Basin, Gulf of California, Mexico	A laminated sequence (core BAP96-CP 24Â°38.12â€²N, 110Â°33.24â€²W; 390 m depth) from the Alfonso Basin in Bay of La Paz, southern Gulf of California, contains a record of paleoceanographic and paleoclimatic changes of the past 7900 yr. Radiolarian assemblages and magnetic susceptibility are used as proxies of oceanographic and climatic variability. The records provide a regional scenario of the m…	No
2-s2.0-33646037343	2006	Ecophysiology and molecular phylogeny of bacteria isolated from alkaline two-phase olive mill wastes	The use of two-phase centrifugal decanters has been widely adopted in the olive oil extraction industry in order to reduce the huge quantities of wastewaters produced during the traditional three-phase extraction process. The resulting sludge-like byproduct, widely known as \alpeorujo\", has a pH of 4-6, low water activity ( aw) and high phytotoxicity. Addition of Ca(OH)2 to alpeorujo, which is c…	No
2-s2.0-33646044392	2006	Mineralogy, geochemistry, and Nd isotope composition of the Rainbow hydrothermal field, Mid-Atlantic Ridge	Petrological, geochemical, and Nd isotopic analyses have been carried out on rock samples from the Rainbow vent field to assess the evolution of the hydrothermal system. The Rainbow vent field is an ultramafic-hosted hydrothermal system located on the Mid-Atlantic Ridge characterized by vigorous high-temperature venting (âˆ¼365Â°C) and unique chemical composition of fluids: high chlorinity, low p…	No
2-s2.0-33645712109	2006	The development of a Local Index of Need (LIN) and its use to explain variations in social services expenditure on mental health care in England	Wide variations in deprivation exist across England and it is likely that these variations translate into differences in the need for mental health care. Social Services Departments in England account for a substantial proportion of mental health expenditure. It is important that the distribution of expenditure reflects mental health needs. This paper's aims are to (1) describe the development of…	No
2-s2.0-30144436874	2006	Assessment of aroma impact compounds in a cashew apple-based alcoholic beverage by GC-MS and GC-olfactometry	The alcoholic fermentation of cashew apple juice has been investigated as an attempt to develop a novel alcoholic beverage, alternative to wine. The objective of this study was to determine the volatile compounds in this beverage and their role in the aroma. Compounds from the headspace were swept to a Porapak Q trap for 2 h by suction and eluted from the polymer with acetone, separated by HRGC a…	No
2-s2.0-33744829030	2006	Hydrothermal decomposition rate of thiodiglycol in supercritical water	Supercritical water (SCW) has been used as a reaction medium, primarily for the oxidation of hazardous chemical wastes. It is essential to obtain the hydrothermal reaction kinetics and provide data for the intermediate products if the supercritical water oxidation process is to be developed. In this paper, the hydrothermal decomposition rate of thiodiglycol [(HOC2H 4)2S, TDG], as the model compou…	No
2-s2.0-34547912828	2006	Transport of a mixture of chlorinated solvent vapors in the vadose zone of a sandy aquifer: Experimental study and numerical modeling	Experimental and modeling studies were performed to investigate the simultaneous transport of trichloroethylene (TCE) and perchloroethylene (PCE) in the vadose zone of a large (25 by 12 by 3 m) well-instrumented artificial aquifer called SCERES. The experimental facility, made up of a 1-m-thick saturated zone and a 2-m-thick unsaturated zone, allowed direct measurements of the contaminants in bot…	No
2-s2.0-33646027623	2006	The analysis of golf swing as a kinematic chain using dual Euler angle algorithm	The manner in which anatomical rotation from an individual segment contributes to the position and velocity of the endpoint can be informative in the arena of many athletic events whose goals are to attain the maximal velocity of the most distal segment. This study presents a new method of velocity analysis using dual Euler angles and its application in studying rotational contribution from upper…	No
2-s2.0-33646587375	2006	Seawater subduction controls the heavy noble gas composition of the mantle	The relationship between solar volatiles and those now in the Earth's atmosphere and mantle reservoirs provides insight into the processes controlling the acquisition of volatiles during planetary accretion and their subsequent evolution. Whereas the light noble gases (helium and neon) in the Earth's mantle preserve a solar-like isotopic composition, heavy noble gases (argon, krypton and xenon) h…	No
2-s2.0-33745606199	2006	Long-term recovery of soft-bottom benthos following urban and industrial sewage treatment in the Nervión estuary (southern Bay of Biscay)	The monitoring of marine benthic communities is based upon their ability to integrate long-term environmental conditions and it is considered an efficient, accurate and useful tool in the detection of pollution effects. However, long-term studies are scarce, and only few are devoted to recovery processes in estuaries following water treatment. In this contribution, the response of the NerviÃ³n es…	No
2-s2.0-33744957725	2006	The Sox2 regulatory region 2 functions as a neural stem cell-specific enhancer in the telencephalon	Sox2 is expressed at high levels in neuroepithelial stem cells and persists in neural stem/progenitor cells throughout adulthood. We showed previously that the Sox2 regulatory region 2 (SRR2) drives strong expression in these cells. Here we generated transgenic mouse strains with the Î²-geo reporter gene under the control of the SRR2 in order to examine the spatiotemporal function of this regulat…	No
2-s2.0-33646736149	2006	Evaluation of the factors controlling the time-dependent inactivation rate coefficients of bacteriophage MS2 and PRD1	Static and dynamic batch experiments were conducted to study the effects of temperature and the presence of sand on the inactivation of bacteriophage MS2 and PRD1. The experimental data suggested that the inactivation process can be satisfactorily represented by a pseudo-first-order expression with time-dependent rate coefficients. The time-dependent rate coefficients were used to determine perti…	No
2-s2.0-33646733031	2006	Mechanism and pathways of chlorfenapyr photocatalytic degradation in aqueous suspension of TiO2	The light-induced degradation of chlorfenapyr under UV was investigated in aqueous solutions containing TiO2 as photocatalyst. The photocatalytic degradation of chlorfenapyr followed pseudo-first-order degradation kinetics (Ct = C0 -kt). The study focused on the identification of possible intermediate products during the degradation, using gas chromatography mass-spectrometry (GC-MS) and 1HNMR. S…	No
2-s2.0-33646250168	2006	Exogenous enzyme supplements to promote treatment efficiency in constructed wetlands	Extracellular enzymes play a central role in the breakdown of organic pollutants. In wetlands constructed to treat wastewaters, supplementing the naturally occurring soil enzymes may result in faster pollutant removal, or breakdown of novel pollutants, but only if the added enzymes could retain their catalytic activity. In this study, the persistence of exogenous enzyme supplements was investigat…	No
2-s2.0-33646733860	2006	Biogeographic evolution of Madagascar's microendemic biota	The endemic species richness on Madagascar, relative to landmass area, is unparalleled in the world. Many organisms on the island have restricted geographical ranges. A comprehensive hypothesis explaining the evolution of this microendemism has yet to be developed. Using an analysis of watersheds in the context of Quaternary climatic shifts, we provide a new mechanistic model to explain the proce…	No
2-s2.0-33646749693	2006	Instrumentation in anaerobic treatment - Research and practice	High rate anaerobic treatment reactors are able to uncouple solids and liquid retention time, resulting in high biomass concentrations. Principal advantages of anaerobic treatment include: energy efficiency, low biomass yield, low nutrient requirement and high volumetric organic loadings. In order to facilitate small reactors operation with stable and good performance automatic process control sy…	No
2-s2.0-33646176823	2006	Determination of organic compounds in water using dispersive liquid-liquid microextraction	A new microextraction technique termed dispersive liquid-liquid microextraction (DLLME) was developed. DLLME is a very simple and rapid method for extraction and preconcentration of organic compounds from water samples. In this method, the appropriate mixture of extraction solvent (8.0 Î¼L C2Cl4) and disperser solvent (1.00 mL acetone) are injected into the aqueous sample (5.00 mL) by syringe, ra…	No
2-s2.0-33646092048	2006	Study of pollutants in precipitation (rain and snow) transported long distance to west coasts of Japan Islands using oblique rotational factor analysis with partially non-negative constraint	In recent years, acidic precipitation (rain and snow) is receiving global interest, especially in East Asia where a rapid industrialization and an economic growth have been observed. In Japan, heavy acidification of precipitation in winter has been observed at areas close to west coasts of the Japan Islands and is related to the long distance transportation of the acidic pollutants across the Sea…	No
2-s2.0-33746467168	2006	Daily intakes of copper, zinc and arsenic in drinking water by population of Shanghai, China	Daily intakes of metals in drinking water are of extreme importance in risk assessment to human health. Some papers focused on this topic, but most of them did not consider the effect of age, gender and work location on daily intakes of metals in drinking water. The objective of present paper is to estimate the levels of Cu, Zn and As ingestion in drinking water in Shanghai, China and the effect …	No
2-s2.0-33745116211	2006	The application of an airborne electromagnetic system in groundwater resource and salinization studies in Jilin, China	Airborne electromagnetic (AEM) systems were first developed in the early 1950's in Canada and Scandinavia. AEM systems have been applied in mineral exploration, geological mapping, geohydrological investigation and environmental monitoring in China since the 1980's. A dual-frequency AEM system (463 Hz, 1,563 Hz) which was developed by IGGE in the early 1980's has surveyed more than 160,000 line-k…	No
2-s2.0-33646917437	2006	Sterols as bio-markers for waste impact and source characterization in stream sediment	Sterols are involved in life processes in organisms and are therefore potential biomarkers for assessment of environmental ecosystems. Current data indicate that sterols are persistent in stream sediments, since sterols are not sufficiently soluble in water to be readily detected in water samples. Stream sediment therefore can act as an integrating exposure index of pollution for animal or human …	No
2-s2.0-33646926998	2006	Internal dose assessment of natural uranium from drinking water based on biokinetic modeling and individual bioassay monitoring: A study of a Finnish family	Since the later 1960's, a nationwide survey on natural radionuclides in drinking water showed high concentrations of natural uranium (U) in Finland, especially in uraniferous granite areas. In order to assess the radiation dose from the natural uranium to individuals, the concentrations of natural uranium in drinking water of the drilled wells were determined by radiochemical and alpha spectromet…	No
2-s2.0-33846442349	2006	Multivariate statistical approaches as applied to environmental physics studies	The present communication deals with the application of the most important environmetric approaches like cluster analysis, principal components analysis and principal components regression (apportioning models) to environmental systems which are of substantial interest for environmental physics - surface waters, aerosols, and coastal sediments. Using various case studies we identify the latent fa…	No
2-s2.0-33646765799	2006	Inducible regulation of Runx2-stimulated osteogenesis	Ex vivo gene therapy is a promising approach to orthopedic regenerative medicine. These strategies typically focus on the constitutive overexpression of osteogenic factors to induce osteoblastic differentiation and matrix mineralization. However, the unregulated production of osteoinductive molecules has also resulted in abnormal bone formation and tumorigenesis. To address these limitations, thi…	No
2-s2.0-33746052124	2006	Tularemia: Current Epidemiology and Disease Management	Four subspecies of the zoonotic bacterium F tularensis have been described to date, with F t tularensis and F t holarctica being the subspecies causing most human tularemia cases. F t holarctica causes tularemia type B, a milder form of tularemia that appears over almost the entire Northern Hemisphere and that seems dependent on an aquatic life cycle. F t tularensis, the agent of the more severe …	No
2-s2.0-33745004120	2006	First description of non-motile Yersinia ruckeri serovar I strains causing disease in rainbow trout, Oncorhynchus mykiss (Walbaum), cultured in Spain	Yersinia ruckeri, the causal agent of enteric redmouth (ERM) disease, was isolated from epizootics that occurred in different Spanish rainbow trout, Oncorhynchus mykiss (Walbaum), farms in which vaccination against ERM had been performed. In all episodes, the most pronounced clinical signs exhibited by affected fish were severe haemorrhages in the mouth, eyes and around the vent. The isolates wer…	Yes, first description of Y. ruckeri serovar I biotype 2 causing disease in cultured trout in Spain vaccinated with commercial ERM vaccines
2-s2.0-33745054151	2006	Treatment of a field case of avian intestinal spirochaetosis caused by Brachyspira pilosicoli with tiamulin	There has been much confusion over the significance of spirochaetes found in the caeca of laying hens and the impact they may have on egg production. In recent years, the situation has been made clearer and the presence of such species as Brachyspira pilosicoli have been shown to cause a mild, chronic disease in both layers and breeders and to reduce egg production by reportedly 5%. In the United…	No
2-s2.0-33751294528	2006	Water column dynamics during the last interglacial anoxic event in the Mediterranean (sapropel S5)	Marine organic-rich sediments are important for long-term carbon sequestration, and as a source of fossil hydrocarbons, but the processes underlying their formation remain elusive. We present a multiproxy analysis of a relatively recent, well-preserved Mediterranean organic-rich deposit known as sapropel S5, which formed 124-119 thousand years ago (ka B.P., where B.P. references year 1950). Combi…	No
2-s2.0-33745099122	2006	Geographic variation in body size: The effects of ambient temperature and precipitation	Latitudinal trends in body size have been explained as a response to temperature- or water-related factors, which are predictors of primary production. We used the first principal component calculated from three body parameters (weight, body length and the greatest length of the skull) of a sample of mammals from Israel and Sinai to determine those species that vary in size geographically, and wh…	No
2-s2.0-33646069663	2006	Project river recovery: Restoration of braided gravel-bed river habitat in New Zealand's high country	Ecological restoration is increasingly becoming a primary component of broader environmental and water resources management programs throughout the world. The New Zealand Department of Conservation implemented Project River Recovery (PRR) in 1991 to restore unique braided gravel-bed river and wetland habitat in the Upper Waitaki Basin in New Zealand's high country of the South Island, which has b…	No
2-s2.0-33646871997	2006	Some useful tactics to modify, map and mine data from intelligent tutors	Mining data logged by intelligent tutoring systems has the potential to discover information of value to students, teachers, authors, developers, researchers, and the tutors themselves - information that could make education dramatically more efficient, effective, and responsive to individual needs. We factor this discovery process into tactics to modify tutors, map heterogeneous event streams in…	No
2-s2.0-33750598927	2006	Formation of the Permian basalts and implications of geochemical tracing for paleo-tectonic setting and regional tectonic background in the Turpan-Hami and Santanghu basins, Xinjiang	The Turpan-Hami and Santanghu basins are the late Paleozoic-Mesozoic-Cenozoic reworked intracontinental basins that superposed on the folded basement of the Paleozoic orogenic belt. 40Ar/39Ar geochronological study of the basalts developed in the basins reveals that the formation period is Permain (293 266 Ma). From geochemical comparison of the basalts, the Santanghu basalts exhibit a strong dep…	No
2-s2.0-33646859698	2006	Combined application of ?13C and molecular ratios in sediment cores for PAH source apportionment in the New York/New Jersey harbor complex	Sub-basins within the New York/New Jersey (NY/NJ) Harbor host variable amounts and sources of polycyclic aromatic hydrocarbons (PAHs). Analyses of radionuclides 137Cs and 7Be were used to assign approximate dates to individual sections of sediment cores collected from four major sub-basins of the harbor complex. Sampling sites range from heavily contaminated Newark Bay and Passaic River to less c…	No
2-s2.0-33746087111	2006	Data assimilation for estimating the terrestrial water budget using a constrained ensemble Kalman filter	A procedure is developed to incorporate equality constraints in Kalman filters, including the ensemble Kalman filter (EnKF), and is referred to as the constrained ensemble Kalman filter (CEnKF). The constraint is carried out as a two-step filtering approach, with the first step being the standard (ensemble) Kalman filter. The second step is the constraint step carried out by another Kalman filter…	No
2-s2.0-33750590569	2006	A stylistic analysis of burial urns from the protohistoric period in central Alabama	The protohistoric period in central Alabama (ca. 1540-1686) represents a fundamental shift in the culture of Native American groups inhabiting the Alabama and Black Warrior River Valleys. The relationship of protohistoric groups to the people of the preceding Late Mississippian culture and their relationship with historically recognized Native American groups is poorly understood. Trends in both …	No
2-s2.0-33644620853	2006	Toposequential effects on water balance and productivity in rainfed lowland rice ecosystem in Southern Laos	In the Mekong region, most paddies in rainfed lowland rice (Oryza sativa L.) lie in a sequence on gentle sloping land, and grain yield (GY) often depends on the toposequence position. There is, however, lack of information on toposequential effects on field water supply in rainfed lowland rice and how that influences GY. A total of eight field experiments were carried out on sandy, coarse-texture…	No
2-s2.0-33745620432	2006	Spatial distribution and bonding forms of heavy metals in sediments along the middle course of the River Elbe (km 287...390)	Sediments of eight groyne fields along the middle course of the River Elbe (river km 287...390) were geochemically studied. The 78 sediment samples were analysed for pH and grain size distribution. The grain size fraction < 2 Î¼ was used for mineralogical and chemical analysis: semi-quantitative clay mineral analysis; total element content (Al, Ca, Fe, K, Mn, Cd, Cr, Cu, Ni, Pb, Zn), total inorga…	No
2-s2.0-33744467936	2006	Low strength wastewater treatment under low temperature conditions by a novel sulfur redox action process	The objective of this research is to make a novel wastewater treatment process activated by a sulfur-redox cycle action of microbes in low temperature conditions. This action is carried out by sulfate-reducing bacteria (SRB) and sulfur-oxidizing bacteria (SOB). The process was comprised of a UASB reactor as pre-treatment and an aerobic downflow hanging sponge (DHS) reactor as post-treatment. As t…	No
2-s2.0-33744504224	2006	Synthetic turbulent inflow conditions based on a vortex method for large-eddy simulation	The generation of 'synthetic turbulence' for 0inflow conditions in Large Eddy Simulation is investigated. The method is based on a 2D vortex method for the lateral components of the fluctuating velocity and a 1D Langevin equation for the streamwise velocity component, mimicking a Restress transport model. Channel flow at Rer= 395 and pipe flow at ReÏ„=360 are used to test the 'synthetic turbulenc…	No
2-s2.0-33744800254	2006	Effects of addition sequence and rapid mixing conditions on use of dual coagulants	The performance of dual coagulants in clay suspension was investigated in this study using aluminium chloride and the cationic polymer as coagulants. According to the study results, the performance of dual coagulants was affected by dosage of aluminium chloride. Beneficial effect by use of dual coagulants were only noted when aluminium chloride was underdosed. The addition sequence of coagulants …	No
2-s2.0-33745173470	2006	Transport of atomic hydrogen through graphite and its reaction with azoaromatic compounds	Graphite is a major non-iron component in commercial iron granules that are typically used for groundwater remediation. Recent studies suggest graphite inclusions in commercial iron may serve as both adsorption and reaction sites for nitrogenous pollutants such as nitroaromatics, nitrate esters, and heterocyclic nitramines. In this study, we investigated graphite-mediated reduction of azoaromatic…	No
2-s2.0-33747271323	2006	Reduction of land based fish-farming impact by phytotreatment pond system in a marginal lagoon area	Intensive land-based fish farming facilities discharged wastewaters into an inlet of the Orbetello lagoon (Southern Tuscany, Italian West Coast), producing large blooms of the green macroalga Ulva rigida C. Ag., accompanied by dystrophic crises. Enclosing a part of this critical inlet resulted in a new pond for phytotreatment of the fish-farming effluents. Between June 1998 and May 1999 a trial s…	No
2-s2.0-33744787876	2006	Iron isotope fractionation during hydrothermal ore deposition and alteration	Iron isotopes fractionate during hydrothermal processes. Therefore, the Fe isotope composition of ore-forming minerals characterizes either iron sources or fluid histories. The former potentially serves to distinguish between sedimentary, magmatic or metamorphic iron sources, and the latter allows the reconstruction of precipitation and redox processes. These processes take place during ore forma…	No
2-s2.0-33744932952	2006	Exhumation of Messinian evaporites in the deep-sea and creation of deep anoxic brine-filled collapsed basins	The first part of the paper summarizes some basic concepts concerning (a) the distribution of Messinian evaporites in the deepest parts of the Mediterranean Sea and (b) the Mediterranean Ridge accretionary wedge and its peculiar characteristics deriving from the presence of a substantial evaporitic body in the deforming sedimentary prism. Then five brine-filled anoxic collapsed basins (Tyro, Bann…	No
2-s2.0-33745699866	2006	One year study of bacterial and fungal nosocomial infections among patients in pediatric intensive care unit (PICU) in Alexandria	A 1-year prospective and observational study included all admissions (n=216) until 48 h after discharge to Alexandria PICU between first of May 2003 and end of April 2004. Cultures for bacteria and fungi and antibiotic sensitivity tests (19 antibiotic using Bauer-Kirby disc diffusion method) were obtained (blood, stool, urine and cerebrospinal fluid, if needed) and repeated on suspicion of NIs. A…	No
2-s2.0-33746638454	2006	Nitrogen and irrigation management practices to improve nitrogen uptake efficiency and minimize leaching losses	Nitrogen (N) is the most important nutrient for plant growth and production. Nitrogen uptake efficiency is dependent on a number of factors. Water management influences the transformation of N sources applied to the soil and transport of the nitrate form of N in the soil. Nitrate-N is the final product of N transformations and is quite mobile in soils with the water front. Leaching of nitrate bel…	No
2-s2.0-33745184676	2006	NO removal in continuous BioDeNOx reactors: Fe(II)EDTA<sup>2</sup>- regeneration, biomass growth, and EDTA degradation	BioDeNOx is a novel technique for NOx removal from industrial flue gases. In principle, BioDeNOx is based on NO absorption into an aqueous Fe(II)EDTA2~ solution combined with biological regeneration of that scrubber liquor in a bioreactor. The technical and economical feasibility of the BioDeNOx concept is strongly determined by high rate biological regeneration of the aqueous Fe(II)EDTA scrubber…	No
2-s2.0-33745208686	2006	Source of radium in a well-water-augmented Florida lake	A study of the lake waters of Saddleback Lake, Florida was undertaken with the goal of determining the source of elevated radium activities in the lake. Four radium isotopes, 226Ra, 228Ra, 223Ra and 224Ra, were measured and activities of all the four radium isotopes were substantially greater in the well water used to augment the lake as compared to the lake waters. In the surface water, radium a…	No
2-s2.0-33646892427	2006	Slope aspect, slope length and slope inclination controls of shallow soils vegetated by sclerophyllous heath-links to long-term landscape evolution	On upland Triassic sandstone slopes of the western Blue Mountains, nonswamp, sclerophyllous heath (shrub-dominated vegetation) on shallow soils is commonly found downslope and adjacent to sclerophyllous forest on deeper soils. Some consider heath-and thus shallow soils-as favouring west-facing slopes, which are expected to experience drier microclimates due to insolation, strong and desiccating w…	No
2-s2.0-33746217514	2006	Chryseobacterium hispanicum sp. nov., isolated from the drinking water distribution system of Sevilla, Spain	Strain VP48T was isolated from drinking water during a screening programme to monitor the bacterial population present in the water distribution system of Sevilla (Spain). A polyphasic taxonomic study of the isolate resulted in its identification as a member of the genus Chryseobacterium, members of which are widely distributed in soil, water and clinical sources. However, the 16S rRNA gene seque…	Yes, Furthermore, phenotypic characteristics clearly indicated that the isolate represents a novel Chryseobacterium species, for which the name Chryseobacterium hispanicum sp. nov. is proposed;
2-s2.0-33745618414	2006	Extremely alkaline (pH &gt; 12) ground water hosts diverse microbial community	Chemically unusual ground water can provide an environment for novel communities of bacteria to develop. Here, we describe a diverse microbial community that inhabits extremely alkaline (pH > 12) ground water from the Lake Calumet area of Chicago, Illinois, where historic dumping of steel slag has filled in a wetland. Using microbial 16S ribosomal ribonucleic acid gene sequencing and microcosm ex…	No
2-s2.0-33745092872	2006	Treatment of a textile dye wastewater by an electrochemical process	This study explored the effectiveness of an electrochemical process to treat a sulfur dye wastewater from a textile industry. The treatment system included a 4.0 L reactor equipped with five steel electrode plates, and a separate sedimentation tank of equal liquid volume. The experimental part involved two distinct, sequential stages. In the first stage, the effect of initial pH and electrical ch…	No
2-s2.0-33748184767	2006	Measurements of wastewater true color by 4/6 wavelength methods and artificial neural network	The ADMI (American Dye Manufactures' Institute) 3 and 31 wavelength (WL) methods are the most popular measurements of the wastewater true color. However, significantly different measured results were found between the ADMI 3 and 31 WL methods for the same sample. This finding indicates that the ADMI 3 and 31 WL values should not be directly substituted for each other, resulting in the incomparabi…	No
2-s2.0-33745610860	2006	Geochemical factors controlling radium activity in a sandstone aquifer	Geochemical processes behind the occurrence of radium activities in excess of the U.S. EPA's drinking water limit of 5 pCi/L combined radium were investigated in a regional sandstone aquifer located in southeastern Wisconsin. Geochemical speciation modeling (PHREEQC 2.7) combined with a detailed understanding of the regional flow system provided by recent flow modeling efforts was used to determi…	No
2-s2.0-33746394245	2006	Role of rainfall intensity and hydrology in nutrient transport via surface runoff	Loss of soil nutrients in runoff accelerates eutrophication of surface waters. This study evaluated P and N in surface runoff in relation to rainfall intensity and hydrology for two soils along a single hillslope. Experiments were initiated on 1- by 2-m plots at foot-slope (6%) and mid-slope (30%) positions within an alfalfa (Medicago sativa L.)-orchardgrass (Dactylis glomerata L.) field. Rain si…	No
2-s2.0-33646554192	2006	Real-time, quantitative PCR assays for the detection of virus-specific DNA in samples with mixed populations of polyomaviruses	Mixtures of polyomaviruses can be present in the central nervous system, the gastrointestinal tract, the genitourinary tract, blood, and urban sewage. We have developed 12 primer/probe sets (four per virus) for real-time, quantitative PCR assays (TaqMan) that can specifically detect BKV, JCV, and SV40 genomes present in mixtures of these viruses. The specificities of these primer/probe sets were …	No
2-s2.0-33746238201	2006	Tepidanaerobacter syntrophicus gen. nov., sp. nov., an anaerobic, moderately thermophilic, syntrophic alcohol- and lactate-degrading bacterium isolated from thermophilic digested sludges	Three anaerobic, moderately thermophilic, syntrophic primary alcohol- and lactate-degrading microbes, designated strains JLT, JE and OL, were isolated from sludges of thermophilic (55 Â°C) digesters that decomposed either municipal solid wastes or sewage sludge. The strains were strictly anaerobic organisms. All three strains grew at 25-60 Â°C and pH 5.5-8.5 and optimum growth was observed at 45-…	No
2-s2.0-33646041907	2006	Polychlorinated biphenyl congener patterns in tree swallows (Tachycineta bicolor) nesting in the Housatonic River watershed, western Massachusetts, USA, using a novel statistical approach	A novel application of a commonly used statistical approach was used to examine differences in polychlorinated biphenyl (PCB) congener patterns among locations and sample matrices in tree swallows (Tachycineta bicolor) nesting in the Housatonic River watershed in western Massachusetts, USA. The most prevalent PCB congeners in tree swallow tissue samples from the Housatonic River watershed were Ba…	No
2-s2.0-34447558450	2006	The gold-rich Louvicourt volcanogenic massive sulfide deposit, New Brunswick: A Kuroko analogue in the Bathurst Mining Camp	The Louvicourt Au-Ag-Cu-Zn-Pb sulfide deposit is hosted by a Middle Ordovician calc-alkaline sequence of aphyric rhyolite flows and associated fragmental rocks at the top of the Flat Landing Brook Formation. The Zr/TiO2 (average = 0.110) and Y/TiO2 (average = 0.021) ratios in the footwall felsic volcanic rocks are consistent with known values for the Reids Brook member. The deposit consists of tw…	No
2-s2.0-33746930863	2006	Between a rock and a hard place: Trace element nutrition in Chlamydomonas	Photosynthetic organisms are among the earliest life forms on earth and their biochemistry is strictly dependent on a wide range of inorganic nutrients owing to the use of metal cofactor-dependent enzymes in photosynthesis, respiration, inorganic nitrogen and sulfur assimilation. Chlamydomonas reinhardtii is a photosynthetic eukaryotic model organism for the study of trace metal homeostasis. Chla…	No
2-s2.0-33748975000	2006	Practice for purpose	A software provider USG announced a joint collaboration with Boeing to make 'digital life cycle management solution' and its 'enterprise data management system' for future civil and defense-related projects. The collaboration endorses the importance of Product Lifecycle Management (PLM) for IT products in digital infomatics manufacturing sector. The PLM streamlines design procedures by enabling d…	No
2-s2.0-33748029502	2006	A Bayesian geostatistical transfer function approach to tracer test analysis	Reactive transport modeling is often used in support of bioremediation and chemical treatment planning and design. There remains a pressing need for practical and efficient models that do not require (or assume attainable) the high level of characterization needed by complex numerical models. We focus on a linear systems or transfer function approach to the problem of reactive tracer transport in…	No
2-s2.0-33745196940	2006	Colloidal rare earth elements in a boreal river: Changing sources and distributions during the spring flood	Variations in the physico-chemical speciation of the rare earth elements (REE) have been investigated in a subarctic boreal river during an intense spring flood event using prefiltered (<100 Î¼m) samples, cross-flow (ultra)filtration (CFF), flow field-flow fractionation (FlFFF), and diffusive gradients in thin films (DGT). This combination of techniques has provided new information regarding the …	No
2-s2.0-33746401974	2006	Experimental oxidative dissolution of sphalerite in the aznalcóllar sludge and other pyritic matrices	After the collapse on 25 Apr. 1998 of the AznalcÃ³llar mine tailings dike in southwestern Spain, 45 km 2 of the Guadiamar valley were covered by a pyritic sludge containing up to 2% sphalerite (ZnS). Later, the sludge was mechanically removed and calcium carbonate was plowed into the soil to immobilize heavy metals. By June 2001 more than 60% of the sulfides in the residual sludge had oxidized an…	No
2-s2.0-33845673396	2006	Structural evolution of the Cross Lake greenstone belt in the northwestern Superior Province, Manitoba: Implications for relationship between vertical and horizontal tectonism	Evidence for both vertical and horizontal movement is well preserved in the Cross Lake greenstone belt in the northwestern Superior Province. The vertical movement components are concentrated in high-strain zones along pluton-greenstone contacts and are characterized by pluton-side-up or greenstone-side-down movement, and the geometry, kinematics, and strain distribution are consistent with a ver…	No
2-s2.0-33746816054	2006	Experimental calibration of lake-sediment spectral reflectance to chlorophyll a concentrations: Methodology and paleolimnological validation	Chlorophyll a preserved in lake sediments reflects, in part, past primary production. This study assesses the spectral properties of sedimentary chlorophyll a using visible-near infrared reflectance (VNIR) spectroscopy, with the objective of establishing a new, non-destructive paleolimnological proxy. Reflectance spectra were determined from a dilution series (n = 10) involving incremental additi…	No
2-s2.0-33744932216	2006	Pharmacokinetics of morphine in fish: Winter flounder (Pseudopleuronectes americanus) and seawater-acclimated rainbow trout (Oncorhynchus mykiss)	We made a single intraperitoneal (IP) injection of morphine sulfate (40 mg/kg) into winter flounder and seawater acclimated rainbow trout at 10Â°C and then followed its disposition by measuring the change in plasma morphine concentration for 100 h using a morphine specific ELISA. Disposition also was followed for 6 h after a single IV injection of 7.5 mg morphine sulfate in winter flounder. Plasm…	No
2-s2.0-33748299286	2006	Environmental genomics of \Haloquadratum walsbyi\" in a saltern crystallizer indicates a large pool of accessory genes in an otherwise coherent species"	Background: Mature saturated brine (crystallizers) communities are largely dominated (>80% of cells) by the square halophilic archaeon \Haloquadratum walsbyi\". The recent cultivation of the strain HBSQ001 and thesequencing of its genome allows comparison with the metagenome of this taxonomically simplified environment. Similar studies carried out in other extreme environments have revealed very …	No
2-s2.0-33745647508	2006	Implementation of the IWA anaerobic digestion model No. 1 (ADM1) for simulating digestion of blackwater from vacuum toilets	The IWA anaerobic digestion model No.1 (ADM1) is applied to the blackwater anaerobic digestion (BWAD) plant in this work. In order to verify the biochemical kinetics, batch experiments were executed. According to the Monod type kinetics, the maximum uptake rates (k m) of butyric acid (HBu), propionic acid (HPr) and acetic acid (HAc) are testified as 18, 14, 13d -1, and their half saturation conce…	No
2-s2.0-33745685139	2006	New ketoimine sorbents in solid phase extraction for HPLC analysis of bisphenol A and other \endocrine disrupting\" residues in drinking water"	Our study was undertaken to compare the behaviour and properties of two new ketoimine sorbents with a commercial sorbent C-18. The sorbents were used to concentrate the endocrine-disrupting compounds (EDCs) in the water, by the use at solid phase extraction (SPE). EDCs were analyzed by high performance liquid chromatography (HPLC) coupled to UV detection. The residues of bisphenol A, bisphenol A …	No
2-s2.0-33744980209	2006	New preservation method for inorganic arsenic speciation in acid mine drainage samples	A new preservation method has been proposed for the speciation of As(III) and As(V) in acid mine drainage (AMD) samples, characterised by low pH and high metallic content. Samples were taken from a polymetallic sulphides mining area in the province of Huelva (SW Spain), under exploitation until the 1960s for its Cu, Pb and Zn sulphides. The abandoned mine works and the numerous waste rocks heaps …	No
2-s2.0-33745071414	2006	Role of narrow mountains in large-scale organization of Asian Monsoon convection	The Asian summer monsoon is organized into distinct convection centers, but the mechanism for this organization is not well understood. Analysis of new satellite observations reveals that narrow mountain ranges are an important organizing agent anchoring monsoon convection centers on the windward side. The Bay of Bengal convection, in particular, features the heaviest precipitation on its eastern…	No
2-s2.0-33746021972	2006	Analysis of size characterized manganese species from liver extracts using capillary zone electrophoresis coupled to inductively coupled plasma mass spectrometry (CZE-ICP-MS)	Mn is of toxicological concern because overexposure can lead to progressive, permanent neurodegenerative damage. Monomethyl-Mn-pentadienyl-tricarbonyl (MMT) is used as an anti-knock agent in fuel. Exhausted Mn compounds are absorbed in the lung and transported to the liver. Extended exposure causes an overflow of the liver with Mn species moving e.g. to the brain, causing irreversible central ner…	No
2-s2.0-33746353396	2006	Levels of polycyclic aromatic hydrocarbons in some agricultural, industrial and urban areas along Xiamen coastal waters, China	An intensive investigation was conducted to study the distribution of polycyclic aromatic hydrocarbons (PAHs), to show firstly the level of pollution in the agricultural areas and analyses specifically the status of soil polluted by these persistent pollutants in some locations of Xiamen region. Soil samples collected from Jiulong agricultural catchment have been analysed for 16 PAH compounds, us…	No
2-s2.0-33646833607	2006	Activated sludge ozonation to reduce sludge production in membrane bioreactor (MBR)	Total experimental period was divided into two stages. At first stage, a series of batch studies were carried out to get an understanding of the effect of ozonation on sludge properties. At the following stages, three membrane bioreactors (MBRs) with different amounts of activated sludge to be ozonated were run in parallel for a long period to evaluate the influence of sludge ozonation on sludge …	No
2-s2.0-33746605638	2006	Algal-bacterial processes for the treatment of hazardous contaminants: A review	Microalgae enhance the removal of nutrients, organic contaminants, heavy metals, and pathogens from domestic wastewater and furnish an interesting raw material for the production of high-value chemicals (algae metabolites) or biogas. Photosynthetic oxygen production also reduces the need for external aeration, which is especially advantageous for the treatment of hazardous pollutants that must be…	No
2-s2.0-33746733527	2006	Changes of hydrological environment and their influences on coastal wetlands in the Southern Laizhou Bay, China	The structure and function of the coastal wetland ecosystem in the southern Laizhou Bay have been changed greatly and influenced by regional hydrological changes. The coastal wetlands have degraded significantly during the latest 30 years due to successive drought, decreasing of runoff, pollution, underground saline water intrusion, and aggravating marine disasters such as storm tides and sea lev…	No
2-s2.0-33747378276	2006	Measurement of biocolloid collision efficiencies for granular activated carbon by use of a two-layer filtration model	Point-of-use filters containing granular activated carbon (GAC) are an effective method for removing certain chemicals from water, but their ability to remove bacteria and viruses has been relatively untested. Collision efficiencies (a) were determined using clean-bed filtration theory for two bacteria (Raoutella terrigena 33257 and Escherichia coli 25922), a bacteriophage (MS2), and latex micros…	No
2-s2.0-33746617298	2006	Study of the interaction of Ni<sup>2+</sup> and Cs<sup>+</sup> on MX-80 bentonite; effect of compaction using the \capillary method\""	The goal of the paper is to assess the applicability of sorption models to describe the retention of contaminants on clay materials, both in dispersed and compacted states. A batch method is used to characterize the sorption equilibria between Cs, Ni, and MX-80 bentonite for solid-to-liquid ratios varying from 0.5 to 4200 kg/m3. For compacted bentonite (dry density of 1100 kg/m3), a new method is…	No
2-s2.0-33750931230	2006	Controlled study of mold growth and cleaning procedure on treated and untreated wet gypsum wallboard in an indoor environment	The basis for some common gypsum wallboard mold remediation practices was examined. The bottom inch of several gypsum wallboard panels was immersed in bottled drinking water; some panels were coated and others were untreated. The panels were examined and tested for a period of 8 weeks. This study investigated: (a) whether mold growth, detectable visually or with tape lift samples, occurs within 1…	No
2-s2.0-33747884275	2006	Haloterrigena longa sp. nov. and Haloterrigena limicola sp. nov., extremely halophilic archaea isolated from a salt lake	Halophilic archaeal strains ABH32T and AX-7T were isolated from Aibi salt lake in Xin-Jiang, China, and were subjected to taxonomic studies. The cells of both strains were rod-shaped, and growth required at least 10% (w/v) NaCl. The cellular polar lipids were identified as phosphatidylglycerol, phosphatidylglycerol phosphate methyl ester and mannose-2,6-disulfate (1â†’2)-glucose glycerol diether …	Yes, strains ABH32T and AX-7T represent two novel species within the genus Haloterrigena, for which the names Haloterrigena longa sp. nov. (type strain ABH32T=CGMCC 1.5334T=JCM 13562T) and Haloterrigena limicola sp. nov. (type strain AX-7T=CGMCC 1.5333T=JCM 13563T) are proposed
2-s2.0-33746401943	2006	Mobility and retention of trace elements in hardpan-cemented cassiterite tailings, north Queensland, Australia	This study reports on the mobility and retention of trace elements in cassiterite tailings at the inactive Jumna mill, tropical north Queensland. Since the 1980s, the uncapped tailings have developed laterally discontinuous Fe-rich hardpans, which are located in the higher parts of gently sloping tailings masses and at the top (<50 cm) of the tailings piles. Hardpan-cemented tailings comprise thi…	No
2-s2.0-33746589416	2006	Effects of temperature on tertiary nitrification in moving-bed biofilm reactors	The effect of wastewater temperature on the rate of nitrification was studied in two pure-oxygen moving-bed biofilm reactors, fed on secondary effluent from a municipal wastewater treatment plant. The first Reactor (R1) was operated under ammonia-limiting conditions, while the second Reactor (R2) was operated under oxygen-limiting conditions. Quite surprisingly, the former showed a negligible inf…	No
2-s2.0-33746603890	2006	A new method for calculation of the chlorine demand of natural and treated waters	Conventional methods of calculating chlorine demand are dose dependent, making intercomparison of samples difficult, especially in cases where the samples contain substantially different concentrations of dissolved organic carbon (DOC), or other chlorine-consuming species. Using the method presented here, the values obtained for chlorine demand are normalised, allowing valid comparison of chlorin…	No
2-s2.0-33947318403	2006	Paleoecological and paleoenvironmental record of the Late Pleistocene record of Lake Khubsugul (Mongolia) based on ostracod remains	This paper deals with the investigation of the upper 11.6 m portion of a long drill core (KDP-01) taken from the bottom sediments of Lake Khubsugul. Ostracod species and their assemblages recovered from the core were analyzed. The data are compared with the carbonate and sulfate values obtained from bulk sediment, as well as with the flux of the coarse terrigenous fraction (>200 m) from the same …	No
2-s2.0-33751066440	2006	Tests of bioaccumulation models for polychlorinated biphenyl compounds: A study of young-of-the-year bluefish in the Hudson River Estuary, USA	A field-based study regarding uptake of polychlorinated biphenyl compounds (PCBs) by young-of-the-year (YOY) bluefish (Pomatomus saltatrix) was initiated to test a steady-state model of bioaccumulation and trophic transfer in a rapidly growing fish. Determination of prey composition as well as size-dependent growth and specific consumption rates for YOY bluefish from separate field and laboratory…	No
2-s2.0-33745600871	2006	Incidence and outcomes of mental disorders in a regional population: The northern rivers mental health study	Objectives: To estimate the incidence of mental disorders in a cohort of previously symptom-free individuals who are representatives of a regional Australian population. To map changing patterns of diagnosis and comorbidity within the cohort over a 2 year period. Method: Two year follow-up of a community-based cohort drawn from a telephone screening of 9191 randomly selected adults. Subjects were…	No
2-s2.0-33746050377	2006	A method for characterizing the complete settling process of activated sludge	Based on batch settling tests, a model describing the compression settling process of activated sludge was developed and validated by experiments. Furthermore, a theoretical equation for determining the critical point when the compression settling stage commences, and a new velocity function for the compression settling were deduced from the model. By combining the new model and the conservation …	No
2-s2.0-33746217852	2006	Design of a method for generation of gas-phase hydroxyl radicals, and use of HPLC with fluorescence detection to assess the antioxidant capacity of natural essential oils	The use of natural antioxidants is of increasing importance in the human diet, because they are recognised as compounds essential to health which minimize or delay the aging process. Despite apparent simplicity, however, it is very difficult to measure and quantify such properties, for which a robust analytical method is required. Because oxidation usually is caused by the presence of OHâ€¢ radic…	No
2-s2.0-33745654979	2006	Differential alcohol drinking behaviour and dependence in the Naples low- and high-excitability rat lines	Alcoholism is composed of a series of phenomena, which can be approached in model systems. Our aim was to investigate psychogenetics of alcohol drinking behaviour and dependence in the Naples rat lines. Thus, adult male rats of the Naples low- (NLE), high-excitability (NHE) and random-bred control (NRB) lines had 24-h access to a four-bottle system with tap water and 5, 10 and 20% alcohol solutio…	No
2-s2.0-33745713348	2006	The application of the MBTH method for carbohydrate determination in freshwaters revisited	There is a lack of reliable and easy-to-use methods for the quantitative determination of carbohydrates in natural waters. Among the existing methods, the 3-methyl-2-benzothiazolinone hydrochloride (MBTH) method has been widely used to determine total dissolved carbohydrates in seawater. Its application to freshwaters has, so far, been less frequent. The objective of this study is to critically e…	No
2-s2.0-33744916772	2006	Kinetics of RDX degradation by zero-valent iron (ZVI)	Hexahydro-1,3,5-trinitro-1,3,5-triazine (RDX) is a common groundwater contaminant at military facilities. The current research has been conducted to evaluate the use of zero-valent iron (ZVI) for the remediation of water contaminated with RDX. RDX was found to degrade rapidly in the presence of ZVI. The observed first-order kinetic constant for RDX reduction follows an enzymatic-like kinetic mode…	No
2-s2.0-33746911652	2006	The effect of the size of particles on mineralization of Oxycaryum cubense (Poepp. &amp; Kunth) lye	Assays were carried out to evaluate effects of detritus size on the mineralization of an aquatic macrophyte, the Oxycaryum cubense. Samples of plant and water were collected from an oxbow lake, the InfernÃ£o lagoon (21Â° 35' S and 47Â° 51' W) located at Mogi GuaÃ§u river floodplain. The plants were taken to the laboratory, washed under tap water, dried (50Â°C) and fractioned into six groups accor…	No
2-s2.0-33745913907	2006	Novel design of osmotic chitosan capsules characterized by asymmetric membrane structure for in situ formation of delivery orifice	In this study, chitosan capsules with asymmetric membrane to induce osmotic effects and in situ formation of the delivery orifice were optimally prepared and characterized. Chitosan capsules were formed on stainless steel mold pins by dipping the pins into a chitosan solution followed by forming asymmetric structure by dipping into a quenching solution containing tripolyphosphate (TPP) to cause a…	No
2-s2.0-33746217904	2006	Inverse modeling of water flow and multicomponent reactive transport in coastal aquifer systems	Modeling groundwater flow and geochemical evolution is a useful tool for studying the paleohydrogeology of coastal aquifer systems. Complex geochemical reaction patterns and long freshening time of coastal aquifers make these processes difficult to model. A stepwise inversion method is presented here for the identification of geochemical processes and the estimation of model parameters in two fie…	No
2-s2.0-33747480234	2006	Spatial and temporal trends of physicochemical parameters in the water of the Reconquista river (Buenos Aires, Argentina)	The Reconquista river is one of the most polluted watercourses in Argentina. More than 3 million people and over 10,000 industries are settled on its basin. The available data show that pollution is mainly related to the discharge of domestic and industrial liquid wastes that are poured into the river almost untreated. At present no site of the river can be characterized as free of pollutants. Sa…	No
2-s2.0-33747110270	2006	Novel catalytic oxidative coupling reaction of N,N-dimethyl-p-phenylenediamine with 1,3-phenylenediamine and its applications to the determination of copper and iron at trace levels by flow injection technique	A new catalytic oxidative coupling reaction of N,N-dimethyl-p-phenylenediamine (DPD) with 1,3-phenylenediamine (mPD) in the presence of hydrogen peroxide has been developed for trace metals analysis. The rate of the oxidation/coupling reaction can be enhanced significantly by iron, copper and cobalt. These metal ions can catalyze the oxidation reaction of DPD to form an oxidized product; the oxid…	No
2-s2.0-33748690573	2006	PET-tool: A software suite for comprehensive processing and managing of Paired-End diTag (PET) sequence data	Background: We recently developed the Paired End diTag (PET) strategy for efficient characterization of mammalian transcriptomes and genomes. The paired end nature of short PET sequences derived from long DNA fragments raised a new set of bioinformatics challenges, including how to extract PETs from raw sequence reads, and correctly yet efficiently map PETs to reference genome sequences. To accom…	No
2-s2.0-33747683444	2006	Photocatalytic and adsorption studies on the removal of dye Congo red from wastewater	Many industries such as paper, food, cosmetics, textiles etc. use dye in order to colour their products. The presence of these dyes in water even at very low concentration is highly visible and undesirable. Colour is the first contaminant to be recognised. Photocatalytic technique and adsorption methods offer a good potential to remove colour from wastewater. In the present paper these two method…	No
2-s2.0-33749330128	2006	Progress of co-infections of Trichodina cooperi and T. murmanica parasitising farmed Atlantic cod Gadus morhua juveniles in Iceland	Two year classes of wild cod juveniles, caught for on-rearing in shore-based tanks, were examined for Trichodina spp. infections at regular intervals for 9 mo. The prevalence, density and proportion of each species found was determined. Additionally, biomass, seawater temperature and salinity in the tanks was recorded regularly. Two species were identified: T. cooperi and T. murmanica. Their prev…	No
2-s2.0-33747196478	2006	Modelling urban stormwater treatment-A unified approach	To protect receiving waters from stormwater pollution, stormwater managers need to be able to predict the performance of proposed stormwater treatment measures, under variable operating conditions. This paper describes the development of a model, capable of predicting the performance of stormwater wetlands, ponds, vegetated swales, sediment basins and biofilters, with a single algorithm. The mode…	No
2-s2.0-33746936598	2006	Feeding of early larval pike Esox lucius L. reared in illuminated cages	The paper presents the results of investigations on the feeding of pike larvae reared in illuminated cages in a mesotrophic lake over a period of 19 days. The same zooplankton species were found both in the lake and illuminated cages. At night, the biomass of all zooplankton groups was higher in illuminated cages than in the lake (with Copepoda prevailing). The first exogenous food of pike larvae…	No
2-s2.0-33846264172	2006	Reduction of Salt Sensitivity in Stroke-Prone Spontaneously Hypertensive Rats Administered an AT<inf>1</inf>Receptor Antagonist During Suckling	Background: In this study, antihypertensive therapy was started during suckling and the effect on blood pressure (BP) and salt sensitivity of stroke-prone spontaneously hypertensive rats (SHRSP) was determined. Methods: The SHRSP were treated with an AT1 receptor antagonist (losartan: 100 mg/L in drinking water) from 2 to 4 weeks of age. After stopping treatment at 4 weeks of age, the control gro…	No
2-s2.0-33750548873	2006	The effect of acoustic cavitation on Chlorophyceae from effluent of wastewater treatment plant	The Chlorophyceae are a large and important group of green algae. They include some of the most common species, as well as many members that are important both ecologically and scientifically. When abundant in the water, they can rapidly cover the surface of sand filters and drastically reduce the length of filter runs. Also, tastes and odors are caused by the release of certain compounds by both…	No
2-s2.0-33646520374	2006	Effective remediation of grossly polluted acidic, and metal-rich, spoil heap drainage using a novel, low-cost, permeable reactive barrier in Northumberland, UK	A permeable reactive barrier (PRB) for remediation of coal spoil heap drainage in Northumberland, UK, is described. The drainage has typical chemical characteristics of pH < 4, [acidity] > 1400 mg/L as CaCO3, [Fe] > 300 mg/L, [Mn] > 165 mg/L, [Al] > 100 mg/L and [SO4] > 6500 mg/L. During 2 years of operation the PRB has typically removed 50% of the iron and 40% of the sulphate from this subsurfac…	No
2-s2.0-33747492397	2006	Molecular characterization of microbial communities in fault-bordered aquifers in the Miocene formation of northernmost Japan	We investigated the diversity and distribution of archaeal and bacterial 16S rRNA gene sequences in deep aquifers of mid- to late Miocene hard shale located in the northernmost region of the Japanese archipelago. A major fault in the north-west-south-east (NW-SE) direction runs across the studied area. We collected three groundwater samples from boreholes on the south-west (SW) side of the fault …	No
2-s2.0-33747589883	2006	Mood stabilizer prescribing in a Christchurch adolescent sample: Does it comply with guidelines?	Objective: To determine the level of compliance with official guidelines for prescribing mood stabilizers among adolescents in Christchurch, New Zealand. Methods: A retrospective audit of clinical files of patients a ged 13-19 years attending inpatient and outpatient services in the Child, Adolescent and Family Service in the Canterbury District catchment area was carried out against set criteria…	No
2-s2.0-33747369806	2006	In vivo correlates of infectious salmon anemia virus pathogenesis in fish	The phenotypic correlates of pathogenicity for Infectious salmon anemia virus (ISAV) in salmonid fishes have not been thoroughly studied to date. In this study, a comparison was made of 13 different strains of ISAV, isolated from different geographical regions between 1997 and 2004, for their infectivity in three fish species [Atlantic salmon (Salmo salar), coho salmon (Oncorhynchus kisutch) and …	No
2-s2.0-33748804937	2006	Chemical characterization and<sup>210</sup>Pb dating in wetland sediments from the Nhecolândia Pantanal Pond, Brazil	Pantanal, located in the central region of South America, is recognized as one of the world's largest freshwater wetlands. In order to verify possible changes in this environment, a study was undertaken in NhecolÃ¢ndia Pantanal, Mato Grosso do Sul State, Brazil. Two sediment cores from the Salina do Meio pond (SM1 and SM2) and one core from a small flood land named BaÃ­a (B5) were collected in 20…	No
2-s2.0-33747467888	2006	Characterisation of selected lentic habitats of Dharwad, Haveri and Uttar Kannada districts of Karnataka state, India	Water quality survey was undertaken to study the current status of water quality of some lentic habitats of Dharwad, Haveri and Uttar Kannada districts, to provide a baseline data, comprising study of their main physical and chemical characteristics and also to evaluate the recent limnological changes those have occurred over a time period in some lentic habitats. Trophic status was also analysed…	No
2-s2.0-33748174563	2006	Wet deposition and related atmospheric chemistry in the São Paulo metropolis, Brazil. Part 3: Trends in precipitation chemistry during 1983-2003	The metropolitan area of SÃ£o Paulo (MASP), with 18 million inhabitants, is one of the largest urban areas of the world, with serious environmental problems, including atmospheric pollution. Even though there is an official network monitoring the air quality, it does not include data on the chemical composition of precipitation. However, some research groups have sampled and measured common analy…	No
2-s2.0-33746518646	2006	Water pollution by Cu and Pb can adversely affect mallard embryonic development	The effects of heavy metal pollutants on aquatic birds have been widely studied in ecotoxicological investigations; however, the predominant focus has been on the postnatal period of life. Limited information on the adverse effects of metals to bird eggs is available. The possible toxic effects of lead and copper were studied in mallard eggs. After the accidental severe heavy metal pollution of t…	No
2-s2.0-33747615731	2006	Strike-slip faulting, rotation, and along-strike elongation in the Kopeh Dagh mountains, NE Iran	The Kopeh Dagh is a linear mountain range separating the shortening in Iran from the stable, flat Turkmenistan platform. In its central part is an array of active right-lateral strike-slip faults that obliquely cut the range and produce offsets of several kilometres in the geomorphology and geological structure. They are responsible for major destructive earthquakes in the 19th and 20th centuries…	No
2-s2.0-33748052668	2006	Microbiology of postoperative infections	Background: Surgical infections, accounting for approximately one quarter of all nosocomial infections, contribute to longer hospital stays and higher medical costs. Clinical failure of antibiotic treatment often is associated with increasing drug resistance. Methods: Non-duplicated microbial isolates obtained at our institution from surgical patients were identified and tested for antimicrobial …	No
2-s2.0-34248191978	2006	Río de la Plata estuary response to wind variability in synoptic to intraseasonal scales: Barotropic response	The first long-period acoustic Doppler current profiler series collected in two locations of the Rio de la Plata estuary are explored for barotropic current variability and its connection to wind variability in synoptic to intraseasonal timescales. Wind-driven currents can be explained in terms of two modes, resulting of the estuary's geometry. The first one prevails for winds with a cross-river …	No
2-s2.0-33748310554	2006	Detection of fatty acid beta-oxidizing syntrophic bacteria by fluorescence in situ hybridization	A new 16S rRNA-targeted oligonucleotide probe, specific for the cluster of fatty acid Î²-oxidizing syntrophic bacteria of the family Syntrophomonadaceae was designed for fluorescence in situ hybridization. This probe was evaluated with target as well as non-target cultures. Moreover this probe was assessed with butyrate and oleate degrading enrichment cultures and methanogenic sludges from full-s…	No
2-s2.0-33748288110	2006	Kinetics of anaerobic biodecolourisation of azo dyes	Kinetics of anaerobic biodecolourisation (methanogenic environment) of four azo dyes (Acid Orange 6, Acid Orange 7, Methyl Orange and Methyl Red) was investigated with regard to their electrochemical properties as well as under variation of dye and sludge concentrations, pH and temperature. Cyclic voltammetry revealed a correlation between the potential of irreversible reduction peak of the dye a…	No
2-s2.0-33748036702	2006	Chemical evolution of thermal springs at Arenal Volcano, Costa Rica: Effect of volcanic activity, precipitation, seismic activity, and Earth tides	Arenal Volcano in NW Costa Rica, Central America has been active during the last 37 years. However, only relatively low temperature springs have been identified on its slopes with temperatures less than around 60 Â°C. The springs are clustered on the NE and NW slopes of the volcano, close to contacts between the recent and older volcanic products or at faults that intercept the volcano. This volc…	No
2-s2.0-33748485374	2006	Evolution of the CD4 family: Teleost fish possess two divergent forms of CD4 in addition to lymphocyte activation gene-3	The T cell coreceptor CD4 is a transmembrane glycoprotein belonging to the Ig superfamily and is essential for cell-mediated immunity. Two different genes were identified in rainbow trout that resemble mammalian CD4. One (trout CD4) encodes four extracellular Ig domains reminiscent off mammalian CD4, whereas the other (CD4REL) codes for two Ig domains. Structural motifs within the amino acid sequ…	No
2-s2.0-33845380361	2006	Arsenic and antimony in drinking water in Khohsorkh area, northeast Iran possible risks for the public health	This is the first study on antimony and arsenic contaminations of Kohsorkh area, northeast, Iran. These contaminants originate from weathering and alteration of rocks and leach into ground and surface water (geogenic exposure). Participants (200) from four villages in the study area with 3287 population were interviewed for history, diet and general health. Causes of death in the area were collec…	No
2-s2.0-33750421135	2006	Civil engineering news: Environmental Engineering: Pittsburgh completes restoration of urban stream	The US Army Corps recently completed restoration of Pittsburgh's Nine Mile Run. The effort provides an important test ragarding the extent to which streams that have been highly altered by human activity can be successfully and permanently restored. Nine Mile Run had experienced significant degradation as a result of uncontrolled storm-water runoff, sewage overflows, and chemical pollution. Two m…	No
2-s2.0-33845407454	2006	Can highly hydrophobic organic substances cause aquatic baseline toxicity and can they contribute to mixture toxicity?	Effect concentrations for aquatic baseline toxicity generally decrease with increasing log octanol-water partition coefficient (Kow) values of up to 5 to 6, whereas less is known about the baseline toxicity of organic chemicals with log Kow values above 6. A physicochemical analysis of the dissolution process for organic chemicals was combined with reported baseline toxicity data, leading to the …	No
2-s2.0-33744927394	2006	Development of tolerance against toxic Microcystis aeruginosa in three cladocerans and the ecological implications	This is the first experimental study to compare difference in the development of tolerance against toxic Microcystis among multi-species of cladocerans (Daphnia, Moina and Ceriodaphnia) pre-exposed to two M. aeruginosa PCC7820 strains (MC-containing and MC-free). Zooplankton were divided into S population (fed Scenedesmus), M-F population (fed Scenedesmus + MC-free Microcystis), and M-C populatio…	No
2-s2.0-33750742738	2006	Eco-efficiency and dairy processing	The dairy industry is a global industry that provides significant nutritional benefit to many cultures. In Australia the industry is especially important economically, being a large export earner, as well as a vital domestic sector. In recent years the sector has come under increased competitive pressure and has restructured to cope with the changes. The industry recently undertook an eco-efficie…	No
2-s2.0-33748150859	2006	Ethnic comparisons of the 12 month prevalence of mental disorders and treatment contact in Te Rau Hinengaro: The New Zealand Mental Health Survey	Objective: To compare ethnic groups for the 12 month prevalence of mental disorders and 12 month treatment contact in Te Rau Hinengaro: The New Zealand Mental Health Survey. Method: Te Rau Hinengaro: The New Zealand Mental Health Survey, undertaken in 2003 and 2004, was a nationally representative face-to-face household survey of 12 992 New Zealand adults aged 16 years and over, including MÄori …	No
2-s2.0-33748940401	2006	Sea ice in the Baltic Sea - A review	Although the seasonal ice cover of the Baltic Sea has many similarities to its oceanic counterpart in Polar Seas and Oceans, there are many unique characteristics that mainly result from the brackish waters from which the ice is formed, resulting in low bulk salinities and porosities. In addition, due to the milder climate than Polar regions, the annual maximum ice extent is highly variable, and …	No
2-s2.0-33748070520	2006	Synthetic musk fragrances in urban and rural air of Iowa and the Great Lakes	Synthetic musk fragrances are semivolatile organic compounds used to scent a variety of household and personal care products. In this study, six polycyclic musk fragrances (HHCB, AHTN, ATII, AHMI, ADBI, and DPMI) and two nitro musk fragrances (musk xylene and musk ketone) were evaluated in 181 air samples collected at urban, suburban, and rural sites in Iowa and the Great Lakes. This is the large…	No
2-s2.0-33746795047	2006	Enhancing disassembly and recycling planning using life-cycle analysis	Both the general public and governmental agencies highly prioritize resource optimization (energy and material) and environmental issues such as ozone, acid rain and global warming in the life-cycle context. Disassembly and recycling are also increasingly important in most industrial countries due to the significant increase in the quantity of used products being discarded. Disassembly of used pr…	No
2-s2.0-33847672309	2006	Incidence, risk factors and prognostic factors of acute renal failure in patients admitted to an intensive care unit	The objective of the present study was to assess the incidence, risk factors and outcome of patients who develop acute renal failure (ARF) in intensive care units. In this prospective observational study, 221 patients with a 48-h minimum stay, 18-year-old minimum age and absence of overt acute or chronic renal failure were included. Exclusion criteria were organ donors and renal transplantation p…	No
2-s2.0-33749435597	2006	Nitrosamine formation pathway revisited: The importance of chloramine speciation and dissolved oxygen	Nitrosamine formation during chloramination previously has been linked to a reaction between monochloramine and organic nitrogen precursors via unsymmetrical dialkylhydrazine intermediates. Our results demonstrate the critical importance of dichloramine and dissolved oxygen. We propose a new nitrosamine formation pathway in which dichloramine reacts with secondary amine precursors to form chlorin…	No
2-s2.0-33750591201	2006	Modern chemometric data analysis - Methods for the objective evaluation of load in river systems	Environmental data are highly variable. They also include uncertainties resulting from all steps of the analytical process e.g. sampling, or sampling pre-treatment. However, a lot of information is unfortunately often lost because only univariate statistical methods are used for data evaluation and interpretation. This neglects correlation between different pollutants and relationships among vari…	No
2-s2.0-33749032125	2006	Brominated flame retardants in the Great Lakes	Brominated flame retardants in the Great Lakes have not been as well studied as many of the polychlorinated pollutants, especially PCBs, but in the last 5-10 years there has been some significant progress. The ubiquity of these compounds in the sediment and fishes of the lakes has now been well established, and perhaps more alarmingly, it is now known that the concentrations of some of these comp…	No	Not clear whether this was indeed the first detection
2-s2.0-33749330511	2006	Biodegradability of four phthalic acid esters under anaerobic condition assessed using natural sediment	Biodegradability of di-n-butyl phthalate (DBP), butylbenzyl phthalate (BBP), di-ethylhexyl phthalate (DEHP), and di-isononyl phthalate (DINP) under an anaerobic condition was evaluated using three natural sediment microcosms obtained from ponds in Osaka, which had not been significantly polluted by the chemicals. The degradabilities of the four phthalic acid esters(PAEs)were analyzed by a first-o…	No
2-s2.0-33748521606	2006	Persistent sex-reversal and oviducal agenesis in adult Xenopus (Silurana) tropicalis frogs following larval exposure to the environmental pollutant ethynylestradiol	It is known that estrogen-like environmental pollutants can feminise gonadal differentiation in frogs resulting in female-biased sex-ratios at metamorphosis. The long-term effects on reproductive function in frogs following larval exposure to pollutants are less known. Amphibian test systems which allow life-cycle studies are therefore needed. The aim of the present study was to characterise long…	No
2-s2.0-33750304769	2006	Trends in polycyclic aromatic hydrocarbon concentrations in the Great Lakes atmosphere	Atmospheric polycyclic aromatic hydrocarbon (PAHs) concentrations were measured in both the vapor and particle phases at seven sites near the Great Lakes as a part of the Integrated Atmospheric Deposition Network. Lower molecular weight PAHs, including fluorene, phenanthrene, fluoranthrene, and pyrene, were dominant in the vapor phase, and higher molecular weight PAHs, including chrysene, benzo[a…	No
2-s2.0-33750531012	2006	Waterborne, nanocomposite pressure-sensitive adhesives with high tack energy, optical transparency, and electrical conductivity	The waterborne, nanocomposite pressure-sensitive adhesives (PSA) with high tack energy, optical transparency, and electrical conductivity was studied. Pressure-sensitive adhesives adhere instantly and firmly to nearly any surface under the application of light pressure, without covalent bonding and activation. The debonding of PSAs occurs by a cavitation process followed by cavity expansion to cr…	No
2-s2.0-33748327343	2006	Variable stoichiometry with thermodynamic control in ADM1	The effect of a variable stoichiometry of the carbohydrate fermentation process in the IWA Anaerobic Digestion Model No.1 (ADM1) is investigated. Most existing anaerobic digestion models including ADM1 consider a fixed-stoichiometry for their conversion processes. The ADM1 model was first transformed into an only mol based model to remove some errors derived from the mixed COD-mol based standard …	No
2-s2.0-33751408598	2006	Shape-controlled production of biodegradable calcium alginate gel microparticles using a novel microfluidic device	In this paper we describe a novel method of manufacturing shape-controlled calcium alginate gel microparticles in a microfluidic device. Both manufacturing shape-controlled microparticles and synthesizing hydrogel microparticles could be performed simultaneously in the microfluidic device. The novel microfluidic device comprised of two individual flow-focusing channels and a synthesizing channel …	No
2-s2.0-33750223555	2006	Seasonal dynamics of pelagic and benthic (littoral and profundal) bacterial abundances and activities in a deep prealpine lake (L. Constance)	In order to obtain a first insight into the characteristics of pelagic, littoral and profundal bacterial communities and their potential role for the degradation of organic matter in the deep prealpine Lake Constance, we compared the seasonal dynamics of bacterial abundances and activities during the annual cycle in the epilimnetic water of a central station as well as in surface layers of sedime…	No
2-s2.0-33750359697	2006	Chemical and mineralogical evaluation of slag products derived from the pyrolysis/melting treatment of MSW	This paper provides the results of studies on the characteristics of novel material derived from pyrolysis/melting treatment of municipal solid waste in Japan. Slag products from pyrolysis/melting plants were sampled for the purpose of detailed phase analysis and characterization of heavy metal-containing phases using optical microscopy, electron probe microanalysis (EPMA), XRF and XRD. The study…	No
2-s2.0-33749530021	2006	Manganese-oxide-coated alumina: A promising sorbent for defluoridation of water	In this study, adsorption potential of a new sorbent manganese-oxide-coated alumina (MOCA) was investigated for defluoridation of drinking water using batch and continuous mode experiments. The effects of different parameters such as pH, initial fluoride concentration and co-existing ions (usually present in groundwater sample) were studied to understand the adsorption behavior of the sorbent und…	No
2-s2.0-33751203558	2006	Paracoccus sulfuroxidans sp. nov., a sulfur oxidizer from activated sludge	Bacterial strain LW36T was isolated from activated sludge of a wastewater-treatment bioreactor. Cells of strain LW36T were Gram-negative coccoids to short rods, 1.0-1.2 Ã— 0Â·5 Î¼m in size. Colonies were cream-coloured, smooth and circular. Strain LW36T was hetero-organotrophic and chemolithotrophic and was able to use reduced sulfur as an energy resource. Growth was observed at 25-36 Â°C and pH …	No
2-s2.0-33845267655	2006	Molecular ecological analysis of planktonic bacterial communities in constructed wetlands invaded by Culex (Diptera: Culicidae) mosquitoes	The succession of the planktonic bacterial community during the colonization by Culex (Diptera: Culicidae) mosquitoes of 0.1-ha treatment wetlands was studied using denaturing gradient gel electrophoresis (DGGE) methodology. Relationships between apparent bacterial diversity and ecological factors (water quality, total bacterial counts, and immature mosquito abundance) were determined during a 1-…	No
2-s2.0-33751204476	2006	Estimation of quantitative descriptors of northeastern Mediterranean karst behavior: Multiparametric study and local validation of the Siou-Blanc massif (Toulon, France)	Key parameters controlling the recharge and behavior of Mediterranean karsts were selected in order to make a quantitative description of northeastern Mediterranean karsts on a regional scale. The methodology was applied to an actual karstic aquifer on the Siou-Blanc Plateau (France). For the recharge study, it was observed that the average yearly rainfall value and Î±18O measurements in springs …	No
2-s2.0-33750302511	2006	Effects of acid-sulfate weathering and cyanide-containing gold tailings on the transport and fate of mercury and other metals in Gossan Creek: Murray Brook mine, New Brunswick, Canada	Gossan Creek, a headwater stream in the SE Upsalquitch River watershed in New Brunswick, Canada, contains elevated concentrations of total Hg (HgT up to 60 Î¼g/L). Aqueous geochemical investigations of the shallow groundwater at the headwaters of the creek confirm that the source of Hg is a contaminated groundwater plume (neutral pH with Hg and Cl concentrations up to 150 Î¼g/L and 20 mg/L, respe…	No
2-s2.0-33751230196	2006	Marinobacter vinifirmus sp. nov., a moderately halophilic bacterium isolated from a wine-barrel-decalcification wastewater	A halophilic, Gram-negative, motile, non-sporulating bacterium designated strain FB1T was isolated from a wine-barrel-decalcification wastewater. The organism comprises straight rods and has a strictly respiratory metabolism with O2. Strain FB1T grows optimally at 20-30 Â°C and 5-6% NaCl. The predominant fatty acids were found to be C18:1Ï‰9C (30.4 %), C16:0 (25.7 %), C12:0 3-OH (10.3 %), C16:1Ï‰…	No
2-s2.0-33751234802	2006	Anaerovirgula multivorans gen. nov., sp. nov., a novel spore-forming, alkaliphilic anaerobe isolated from Owens Lake, California, USA	A novel, alkaliphilic, obligately anaerobic bacterium, strain SCAT, was isolated from mud sediments of a soda lake in California, USA. The rod-shaped cells were motile, Gram-positive, formed spores and were 0-4-0-5 Ã— 2-5-5-0 Î¼m in size. Growth occurred within the pH range 6Â·7-10Â·0 and was optimal at pH 8Â·5. The temperature range for growth was 10-45Â°C, with optimal growth at 35Â°C. NaCl was…	No
2-s2.0-33748502508	2006	The reciprocal influence between ion transport and degradation of PA66 in acid solution	Transport behavior of acid solution through polyamide was studied by measuring element distribution in cross section, pH, and ion concentration. Degree of degradation that related to the decreasing of molecular weight and flexural strength was observed in order to study the influence of acid solution on the polyamide 66 (PA66) degradation. The permeation mechanism of acid solution can be explaine…	No
2-s2.0-33751421780	2006	Inhibition of rainbow trout (Oncorhynchus mykiss) P450 aromatase activities in brain and ovarian microsomes by various environmental substances	Aromatase, a key steroidogenic enzyme that catalyses the conversion of androgens to estrogens, represent a target for endocrine disrupting chemicals. However, little is known about the effect of pollutants on aromatase enzymes in fish. In this study, we first optimized a rainbow trout (Oncorhynchus mykiss) microsomal aromatase assay to measure the effects of 43 substances belonging to diverse che…	No
2-s2.0-33749531896	2006	A system dynamics model for the environmental management of the Sepetiba Bay Watershed, Brazil	In the recent past, the Sepetiba Bay watershed, located in the Rio de Janeiro State, Brazil has experienced rapid industrial development and population growth, as well as an increase in water pollution and environmental degradation. To analyze the complex interrelationships among the agents affecting the Sepetibza Bay environment, a system dynamics model was developed. The model builds on extensi…	No
2-s2.0-33846821835	2006	Climatic factors associated with epidemic dengue in palembang, Indonesia: Implications of short-term meteorological events on virus transmission	An extensive outbreak of dengue fever and dengue hemorhagic fever occurred in the city of Palembang, South Sumatra, Indonesia from late 1997 through March/April 1998. All surveyed administrative areas (kelurahan) in Palembang were found to be 'permissive' for dengue virus transmission; and all areas that had Aedes (subgenus Stegomyia) larval mosquitoes in abundance experienced increased cases of …	No
2-s2.0-33751322194	2006	Groundwater treatment: Chemical catalyst readily destroys perchlorate	Although still in the early stages of development, a catalyst that can convert perchlorate in water into harmless by-products holds promise as a new means of treating water. The process developed by Shapley and Keith Hurley, a doctoral candidate in chemistry at University of Illinois, converts perchlorate into harmless chloride and water using hydrogen gas and two metals, palladium and rhenium. T…	No
2-s2.0-34248228124	2006	New durable sealant of telechelic polyacrylate	In this paper, we discuss the application possibilities of a novel telechelic acrylic polymer (NTP) which we have been developing as a versatile base polymer for sealants and adhesives. Due to its unique features, our NTP is expected to offer a variety of applications, including the one for sealants applied in contact with self-cleaning glass (SCG). Our discussion here focuses on the possibilitie…	No
2-s2.0-33751354622	2006	Long-term faunal changes in a regulated and an unregulated stream - Cow Green thirty years on	Cow Green dam is situated in Northern England on the River Tees in a region with high average wind speeds (24 km h-1), low average annual temperatures (circa 5Â°C) and average rainfall of 1800 mm. The River Tees was impounded by the Cow Green dam in 1970 and early studies revealed significant changes arising from flow regulation. This study compares macroinvertebrate communities in 2004 with thos…	No
2-s2.0-33750887218	2006	Multi-element association analysis of stream sediment geochemistry data for predicting gold deposits in south-central Yunnan Province, China	The use of traditional statistical and new methods of spatial analysis can provide suitable indicators of geochemical element dispersion, and aid in targeting potential areas for mineral exploration. A case study involving the analysis of stream sediment geochemistry data from an area in Yunnan province, South China, is presented. The area has two known areas of gold deposits where several mines …	No
2-s2.0-33750437777	2006	Hypoxia and benthic community recovery in Korean coastal waters	Low dissolved oxygen (hypoxia and/or anoxia) has become a major cause of change to the benthic component of ecosystems around the world. We present the response of a benthic community to hypoxia in organically enriched environments in Korean coastal waters. Disturbances due to low dissolved oxygen (DO), and organic enrichment altered community dynamics, result in defaunation during summer hypoxia…	No
2-s2.0-33751229597	2006	Compound-specific isotopic analyses track changes in seasonal precipitation regimes in the Northeastern United States at ca 8200 cal yr BP	We analyzed the hydrogen isotopic composition of sedimentary leaf wax (C28 n-acid) and palmitic acid (C16 n-acid) in cores from Berry and Crooked Ponds in Massachusetts. The results show a dramatic positive shift in leaf wax Î´D values around 8200 cal yr BP, when regional lake levels rose and plant communities shifted in favor of plants intolerant of dry conditions. To aid our interpretation, we …	No
2-s2.0-33750302103	2006	Removal of phenol and chlorophenols from water with reusable dye-affinity hollow fibers	Reactive Green HE 4BD carrying polyamide hollow fibers were investigated as dye-affinity adsorbents for removal of chlorophenols (i.e., phenol, o-chlorophenol, p-chlorophenol and 2,4,6-trichlorophenol). Adsorption rates of chlorophenols were very high. Equilibrium was achieved in about 30 min. The applicability of two kinetic models including pseudo-first order and pseudo-second order model was e…	No
2-s2.0-33750062576	2006	Quantitative studies on the effects of environmental estrogens on the testis of the guppy, Poecilia reticulata	Estrogens that enter into the water system, such as by sewage effluent, may affect the reproductive capabilities of aquatic animals. The guppy (Poecilia reticulata) was chosen as a model organism to test the level of disturbances in primary and secondary sexual characteristics. Male guppies were exposed to 17Î²-estradiol (10 and 50 ng L-1), and 17Î±-ethinylestradiol (10, 50 and 200 ng L-1) for 3.…	No
2-s2.0-33751012100	2006	Biological treatment of perchlorate in spent ISEP ion-exchange brine	The use of a biological process for perchlorate and nitrate destruction in spent brine from ion exchange processes was evaluated. The salt-tolerant, anaerobic culture consistently reduced perchlorate and nitrate in spent brine to below detection limits within 24 h in the presence of varying concentrations of brine constituents such as salt (3 to 10% NaCl), nitrate (400 to 4,000 mg/L), sulfate (60…	No
2-s2.0-33751052468	2006	Organic matter release in low temperature thermal treatment of biological sludge for reduction of excess sludge production	Thermal treatment applied in association with a biological system allows for a significant reduction in excess sludge production (âˆ¼50%). In general, heat treatment is described as a sludge disintegration technique. This paper offers a thorough study on the impact of heat treatment, at temperatures below 100 Â°C, on the solubilisation of the sludge COD and its biodegradability. Discontinuous hea…	No
2-s2.0-33751116574	2006	Inter-basaltic clay (bole bed) horizons from Deccan traps of India: Implications for palaeo-weathering and palaeo-climate during Deccan volcanism	Reddened clay-rich horizons between basalt flows have historically been identified as \baked zones\" or as zones of lateral groundwater movement. The reddening was interpreted as a form of alteration due to thermal or chemical processes. Many of these zones are referred to as \"bole beds\" in Deccan traps and occur as prominent horizons showing red to brown, green, purple or grey colors, and are …	No
2-s2.0-33750311308	2006	Adaptation of a freshwater anammox population to high salinity wastewater	For the successful application of anaerobic ammonium oxidation (anammox) in wastewater practice it is important to know how to seed new anammox reactors with biomass from existing reactors. In this study, a new high salinity anammox reactor was inoculated with biomass from a freshwater system. The changes in activity and population shifts were monitored. It was shown that freshwater anammox bacte…	No
2-s2.0-36148942128	2006	Contamination of agricultural soil by arsenic containing irrigation water in Bangladesh: Overview of status and a proposal for novel biological remediation	Arsenic toxicity in the groundwater of Bangladesh poses a serious threat to public health. More than 35 million people are consuming arsenic-polluted groundwater there. So far, a lot of effort has been made to find safe drinking water but no suitable solution has yet been established, while continued cropping with arsenic contaminated irrigation water increases the extent of contamination in agri…	No
2-s2.0-67650105043	2006	High-resolution simulation of basin-scale nitrate transport considering aquifer system heterogeneity	Nitrate contamination presents a growing threat to many groundwater basins relied upon for drinking water. This study combines geostatistical techniques, parallel computing of fl ow simulation, and particle tracking to develop realistic nitrate loading and transport scenarios. The simulation scenarios are patterned after the rapidly urbanizing Llagas groundwater subbasin in the south San Francisc…	No
2-s2.0-33846431244	2006	Decaspirones A-E, bioactive spirodioxynaphthalenes from the freshwater aquatic fungus Decaisnella thyridioides	Decaspirones A-E (1-5), five new compounds related to the palmarumycins, were isolated from cultures of the freshwater aquatic fungal species Decaisnella thyridioides. The known compound palmarumycin CP1 (6) was also obtained. The structures of 1-5 were determined by analysis of NMR and MS data, and their relative configurations were assigned by analysis of 1H NMR J-values and NOESY data. The str…	No
2-s2.0-33845337986	2006	Molecular tracers of soot and sewage contamination in streams supplying New York City drinking water	A molecular tracer method was used to assess the extent and sources of pollution to 60 stream sites that were distributed across the watersheds that supply drinking water to the greater New York City area. Samples were collected from each site annually from 2000 to 2002 during summer baseflow conditions. Twelve polycyclic aromatic hydrocarbons (PAH), 2 fragrance materials (FM), caffeine (CAF), an…	No
2-s2.0-33845900496	2006	A unique, environmentally sustainable and cost-effective programme to re-vegetate military training lands utilising composted wastewater biosolids at a large Canadian military training centre	The Greater Moncton Sewerage Commission has developed, in concert with National Defence Canada, an environmentally sustainable and cost effective biosolids management and land reclamation programme at the Canadian Forces Base (CFB) Gagetown, New Brunswick, Canada (the second largest land based Military Training Facility in the British Commonwealth). The use of composted biosolids to revegetate mi…	No
2-s2.0-33750918484	2006	Criblamydia sequanensis, a new intracellular Chlamydiales isolated from Seine river water using amoebal co-culture	Accumulating evidence supports a role for Chlamydia-related organisms as emerging pathogens for human and animals. Assessment of their pathogenicity requires strain availability, at least for animal models and serological studies. As these obligate intracellular species are able to grow inside amoebae, we used co-culture with Acanthamoeba castellanii in an attempt to recover new Chlamydia-related…	Yes, new species 'Criblamydia sequanensis' in Seine
2-s2.0-69549120457	2006	Uranium mining and ore processing in Ukraine - radioecological effects on the Dnipro River water ecosystem and human health	Results on the ecological impact of radionuclides from a uranium tailing dump in Dniprodzerzhinsk (Ukraine) and from leaching of contaminated water from an ore processing tailing pond close to the town of Zhovti Vody into the rivers are presented. It appears that most of the former uranium mining and milling operations have been conducted without sufficient and adequate care for the environmental…	No
2-s2.0-34547687593	2006	Porcelain laminate veneer restorations bonded with a three-liquid silane bonding agent and a dual-activated luting composite.	This clinical report describes the fabrication and bonding of porcelain laminate veneer restorations in a patient with anterior open spaces. Laminate veneer restorations made of feldspathic porcelain were etched with 5% hydrofluoric acid, rinsed under tap water, ultrasonically cleaned with methanol, and primed with a chemically activated three-liquid silane bonding agent (Clearfil Porcelain Bond)…	No
2-s2.0-33750533172	2006	Electrochemical degradation of 4-chloroguaiacol for wastewater treatment using PbO<inf>2</inf>anodes	Electrochemical oxidation of 4-chloroguaiacol (4-CG) at Nb/PbO2 anodes was studied under different experimental conditions such as initial concentration of substrate, electrolysis time, temperature and pH. We measured the concentrations of 4-chlorocatechol (4-CC), 2-methoxyhydroquinone (2-MHQ), maleic acid (MA) and carbon dioxide as the main products. Black solid particles consisting mainly of po…	No
2-s2.0-33749678627	2006	Toxicity of copper excess on the lichen Dermatocarpon luridum: Antioxidant enzyme activities	The aim of this study was to investigate the toxicity of copper on the aquatic lichen Dermatocarpon luridum focusing on the activities of some antioxidant enzymes. Investigations were conducted using increasing copper concentrations (0.00, 0.25, 0.50, 0.75 and 1.00 mM CuSO4Â·5H2O) in synthetic freshwater that emulated the major ion compositions of its natural water biota; time course measurement …	No
2-s2.0-71149115937	2006	Application of fuzzy neural network for supporting measurements and control in a Wastewater treatment plant	Wastewater treatment has become a very important aspect of environmental protection. The main goal of a wastewater treatment plant (WWTP) is to reduce the level of wastewater pollution. The application of AI (artificial intelligence) techniques in wastewater treatment provides an alternative way of operating complex process, helps to reduce energy consumption and to improve the efficiency of the …	No
2-s2.0-33845800171	2006	Effects of salinity and temperature on the germination of Phragmites australis, Juncus kraussii, and Juncus acutus: Implications for estuarine restoration initiatives	We describe effects of salinity and temperature on germination characteristics of three dominant macrophytes, Phragmites australis, Juncus acutus, and J. kraussii, located in wetlands along the Hunter River, New South Wales, Australia. These wetlands were altered, from estuarine to freshwater habitats, by flood mitigation activities initiated during the 1970s. Tidal restoration to approximately 3…	No
2-s2.0-33846276941	2006	Ecological aspects influencing the helminth community of the wood mouse Apodemus sylvaticus in Dunas de Mira, Portugal	This paper presents the first extensive data on the helminth community of the wood mouse Apodemus sylvaticus in a coastal sand dune area in Portugal. The 557 hosts analysed in this study were trapped seasonally between autumn 2002 and summer 2005 across 6 habitat types. Twelve helminth species were detected among which, Taenia parva larvae, Angiostrongylus dujardini, Heligmosomoides polygyrus, Sy…	No
2-s2.0-34548648018	2006	Innate and adaptive processes in the spleen.	The spleen is a lymphatic organ interposed in the blood stream. It remains a largely neglected aggregate of lymphoid tissue. The spleen immune system is responsible for protecting the body from invading pathogens and detecting senescent, mechanically damaged, displaced and aberrant cells that could lead to tumor formation. Recent studies prove its dominant role in a simultaneous dual reaction to …	No
2-s2.0-33846272206	2006	The use of various yeast strains for removal of pine wood extractive constituents	The yeast strains Trichosporon pullulons, Cryptococcus albidus, Sporobolomyces salmonicolor, and Debaryomyces occidentalis var. occidentalis isolated from plant material were cultured in a medium containing pine sawdust. Their ability to degrade extractives from Pinus sylvestris was examined by HPLC analysis and FTIR spectroscopy of acetone extracts obtained by the extraction of pine wood before …	No
2-s2.0-34250806301	2006	Relationship between sex steroid and vitellogenin concentrations in flounder (Platichthys flesus) sampled from an estuary contaminated with estrogenic endocrine-disrupting compounds	High concentrations of vitellogenin (VTG; egg yolk protein) have previously been found in male flounder (Platichthys flesus) from several UK estuaries; these levels have been ascribed to the presence of estrogenic endocrine-disrupting compounds (EDCs). Gonadal abnormalities, including intersex, have also been recorded in these estuaries. However, there is no firm evidence to date that these two f…	No
2-s2.0-33846304691	2006	Listeria monocytogenes in multiple habitats and host populations: Review of available data for mathematical modeling	Listeria monocytogenes has the ability to survive and multiply in diverse habitats and to cause infection in a variety of animal species and humans. We evaluated the literature on survival and multiplication within and transmission among multiple host populations and habitats, including man, sewage, general environment (soil, water, and vegetation), silage (fermented plant material), animals (inc…	No
2-s2.0-33846254104	2006	The interaction of Desulfovibrio äspöensis DSM 10631<sup>T</sup>with plutonium	Microbes are widely distributed in nature and they can strongly influence the migration of actinides in the environment. This investigation describes the interaction of plutonium in mixed oxidation states (Pu(VI) and Pu(IV)-polymers) with cells of the sulfate-reducing bacterial (SRB) strain Desulfovibrio Ã¤spÃ¶ensis DSM 10631T, which frequently occurs in the deep granitic rock aquifers at the Ã„s…	No
2-s2.0-33751002329	2006	Intrusive gravity currents	The speed of a fluid intrusion propagating along a sharp density interface is predicted using conservation of mass, momentum and energy. For the special case in which the intrusion density equals the depth-weighted mean density of the upper and lower layers, the theory of Holyer & Huppert (J. Fluid Mech., vol. 100, 1980, p. 739) predicts that the intrusion occupies one-half the total depth, its s…	No
2-s2.0-33846471680	2006	Calcium additions and microbial nitrogen cycle processes in a northern hardwood forest	Evaluating, and possibly ameliorating, the effects of base cation depletion in forest soils caused by acid deposition is an important topic in the northeastern United States. We added 850 kg Ca ha-1 as wollastonite (CaSiO3) to an 11.8-ha watershed at the Hubbard Brook Experimental Forest (HBEF), a northern hardwood forest in New Hampshire, USA, in fall 1999 to replace calcium (Ca) leached from th…	No
2-s2.0-33750203999	2006	Effect of clay deposits on physicochemical and intermittent evaporation characteristics of Torripsamment	Clay minerals are the key component controlling water storage and movement in irrigated arid soils. This research aims to evaluate the effect of different rates of deposits varied in the clay minerals on physicochemical properties and intermittent evaporation of Torripsamment. Four clay deposits, bentonite, zeolite (clinoptilolite) and treated sewage sludge (TSS) samples were selected and mixed w…	No
2-s2.0-33845291908	2006	Pseudomonas syringae pv. tagetis (PST) population dynamics both on and in Canada thistle (Cirsium arvense) leaves as affected by rain events	Field trials were conducted to evaluate the season long population dynamics and location (in leaf or on leaf surface) of an antibiotic resistant strain of the bacterium Pseudomonas syringae pv. tagetis (PST) applied to Canada thistle leaves. An application preceding 2 to 3 d of hot dry weather was compared to an application preceding 2 to 3 d of cool wet weather. Leaf samples were taken weekly to…	No
2-s2.0-33751210314	2006	Relative velocities of DNAPL and aqueous phase plume migration	Numerical simulation is used to examine the relative velocities of DNAPL and aqueous phase plumes in sandy aquifers where lateral spreading of DNAPL has occurred at the base of the aquifer. The scenario being modeled is one where a permeable aquifer is underlain by a sloping aquitard, which results in lateral migration of the DNAPL down the slope, in addition to lateral migration of an aqueous ph…	No
2-s2.0-33751101845	2006	On the formation of an inverted weathering profile on Mount Kilimanjaro, Tanzania: Buried paleosol or groundwater weathering?	This paper presents an investigation into the degree and nature of chemical weathering during soil formation on a volcanic (phonolite) substrate on the southern slopes of Mt. Kilimanjaro in northern Tanzania. The high field strength elements Nb and Ta were used to estimate enrichments and depletions relative to the bedrock. The degree of weathering was found to increase with depth in the soil pro…	No
2-s2.0-33845569181	2006	Predicting river flow statistics at ungauged locations - A hydrostochastic approach	The specific objective of this paper is to provide an overview of the collaborative projects between the University of Oslo (Norway) and Cemagref (France). The research undertaken concentrated on the development of methods for estimating statistical properties of the water balance components (especially runoff) at ungauged locations. Probability and Statistical Theory is used to estimate runoff c…	No
2-s2.0-33845702568	2006	The relation of largemouth bass virus to largemouth bass population metrics in five Alabama reservoirs	Between the early to mid-1990s and 1998-2000, angler and electrofishing catch rates of memorable-size (â‰¥2.27-kg or 51-cm) largemouth bass Micropterus salmoides declined 3-20-fold in five Alabama reservoirs. Largemouth bass virus (LMBV) has been implicated in widespread fish kills of this species, and we documented the prevalence of LMBV and attempted to quantify the impact of LMBV on growth, bo…	No
2-s2.0-33845696481	2006	The implications of burning a blend of waste materials in a fluidizied bed combustor	A mixture involving wood, plastics, paper, and textile materials was burned in a fluidized bed combustor to monitor the gaseous emissions and to analyze the ashes collected in different locations of the installation. The ashes collected were first analyzed to verify the partitioning of heavy metals in different ash streams. They were then subjected to leaching tests to verify the solubility of di…	No
2-s2.0-33751546890	2006	Analysis of bacteria degradation products of methyl parathion by liquid chromatography/electrospray time-of-flight mass spectrometry and gas chromatography/mass spectrometry	The biodegradation of the organophosphorus insecticide methyl parathion (MP) in aqueous environment by bacteria isolated from river sediment has been studied. Two species of bacteria which show strong MP degradation ability are identified as Shewanella and Vibrio parahaemolyticus. The biodegradation of MP proceeded rapidly with the formation of a series of intermediate products, which were analyz…	No
2-s2.0-38049156609	2008	Determination of tellurium at ultra-trace levels in drinking water by on-line solid phase extraction coupled to graphite furnace atomic absorption spectrometer	In this paper, two time-based flow injection (FI) separation pre-concentration systems coupled to graphite furnace atomic absorption spectrometry (GFAAS) for tellurium determination are studied and compared. The first alternative involves the pre-concentration of the analyte onto Dowex 1X8 employed as packaging material of a micro-column inserted in the flow system. The second set-up is based on …	No
2-s2.0-52649167868	2008	Process water treatment in Canada's oil sands industry: II. A review of emerging technologies	Canada's oil sands industry uses large volumes of freshwater to extract bitumen from surface-mined ore. With oil production expected to increase 3-fold over the next decade, process water treatment has become a critical issue for oil sands operators, both in terms of sustaining bitumen recovery and protecting freshwater resources. To identify candidate treatment technologies, a review was conduct…	No
2-s2.0-38349130778	2008	Effect of cadmium on gonadal development in freshwater turtle (Trachemys scripta, Chrysemys picta) embryos	Prior studies on painted turtle (Chrysemys picta) sub-populations near the Massachusetts Military Reservation (MMR), a Superfund site on Cape Cod, Massachusetts, USA, suggest several reproductive deficits which may be related to xenobiotics. Several heavy metals, including cadmium, have been detected in Cape Cod surface water and sediments. The present study was carried out to investigate the eff…	No
2-s2.0-36649024593	2008	A new assay system for evaluation of developmental immunotoxicity of chemical compounds using respiratory syncytial virus infection to offspring mice	We evaluated the effect of 6-propyl-2-thiouracil (PTU), an anti-thyroid agent, on developmental immunity using respiratory syncytial virus (RSV) infection to offspring mice as a new risk assessment for brominated flame retardants (BFRs), because some BFRs are suspected of affecting the thyroid system. Pregnant mice were exposed to PTU in drinking water from gestation day 10 to weaning on postnata…	No
2-s2.0-37549038672	2008	Novel ecological niche of Cetobacterium somerae, an anaerobic bacterium in the intestinal tracts of freshwater fish	Aims: This study was conducted to clarify the taxonomic status of Bacteroides type A strains with high vitamin B12-producing ability that is widely distributed in the intestinal tracts of freshwater fish. Methods and Results: Seventeen strains of Bacteroides type A isolated from five fish species were all rod-shaped and gram-negative. The strains were positive for esculin hydrolysis, nitrate redu…	No
2-s2.0-36849054589	2008	Constructed wetlands for environmental pollution control: A review of developments, research and practice in Ireland	For the purpose of synthesizing a compendium of efforts aimed at environmental pollution control through the use of constructed wetlands systems (CWs) in Ireland, a detailed review of CWs was undertaken. Emphasis was placed on the diverse range of development, practice and researches on CWs technology, placing them in the overall context of the need for low-cost and sustainable wastewater treatme…	No
2-s2.0-40449097669	2008	Description of Roseateles aquatilis sp. nov and Roseateles terrae sp. nov., in the class Betaproteobacteria, and emended description of the genus Roseateles	Three strains of aerobic Gram-negative bacilli, two isolated from industrial water and freshwater (strains CCUG 48205T and CCUG 52220) and the third from soil (strain CCUG 52222T), were analysed phenotypically and genotypically to clarify their taxonomic classification. 16S rRNA gene sequence analysis revealed that the three strains were located on the same phylogenetic branch, closely related to…	No
2-s2.0-52649145373	2008	Interpretation of groundwater quality using multivariate statistical technique in Moradabad City, Western Uttar Pradesh State, India	Groundwater samples from Moradabad city were analyzed for chemical parameters. For present study 58 water samples were collected from different localities on the basis of various land use patterns. The higher values of most of the parameters were found in the area of old settlement, while lower values observed in new settlements. This shows clear impact of land use on groundwater. Water quality d…	No
2-s2.0-36249017919	2008	Elevated in-home sediment contaminant concentrations - The consequence of a particle settling-winnowing process from Hurricane Katrina floodwaters	Sediment samples were collected from two homes which were flooded in the wake of Hurricane Katrina in August 2005. The samples were analyzed for trace metals and semi-volatile organic compounds using techniques based on established EPA methods. The data showed higher concentrations of some metals and semi-volatile organic pollutants than reported in previous outdoor sampling events of soils and s…	No
2-s2.0-58849085078	2008	Monitoring of pulp mill effluents in the coastal waters of North Estonia	In September 2006, AS Estonian Cell, a brand new aspen pulp mill was opened near Kunda. Partly due to ill memories of past environmental problems in the region, the environmental standards for the plant were set very high. The factory features sulphur free production, chlorine free bleaching and low fresh water consumption. High requirements were put on environmental monitoring. The purified wast…	No
2-s2.0-38149037021	2008	Relationships between bacterial diversity and environmental variables in a tropical marine environment, Rio de Janeiro	This study is the first to apply a comparative analysis of environmental chemistry, microbiological parameters and bacterioplankton 16S rRNA clone libraries from different areas of a 50 km transect along a trophic gradient in the tropical Guanabara Bay ecosystem. Higher bacterial diversity was found in the coastal area, whereas lower richness was observed in the more polluted inner bay water. The…	No
2-s2.0-38549167869	2008	Where do floodplains begin? The role of total stream power and longitudinal profile form on floodplain initiation processes	Understanding downstream transitions in river character and behavior is a basic concept in fluvial geomorphology. Downstream patterns of depositional processes can be differentiated between channel and floodplain components. In this study a generic set of methods is used to analyze floodplain initiation and continuity in relation to downstream changes in total stream power (slope and discharge) a…	No
2-s2.0-50049100131	2008	Effects of the coastal sediment elutriates containing persistent organic pollutants (POPs) on early reproductive outputs of the Pacific oyster, Crassostrea gigas	We previously found that embryonic development of the bivalve species was highly vulnerable to xenobiotic chemicals, damaging the coastal ecosystem integrity. To further assess their potential damage to ecosystem, the xenobiotic composition of the sediment elutriates from two representative industrialized Korean coasts, Pohang and Ulsan, were determined with gas chromatography/mass spectrometry (…	No
2-s2.0-58149153138	2008	Average score per metric: An alternative metric aggregation method for assessing wadeable stream health	Integrating multiple metrics derived from stream macroinvertebrate communities into single scores that reflect ecological condition can bridge the needs of multiple groups using biomonitoring data. Macroinvertebrate metrics from 511 Waikato, New Zealand, stream samples were standardised by their maximum observed value. Metric redundancy and optimisation processes identified three standardised met…	No
2-s2.0-48549097778	2008	A New Medium-term Rat Colorectal Bioassay Applying Neoplastic Lesions as End Points for Detection of Carcinogenesis Modifiers Effects with Weak or Controversial Modifiers	We have established a two-stage, medium-term rat colorectal carcinogenesis model featuring induction of neoplastic lesions within ten weeks. In the present study, we examined the ability of this model to detect weak modifiers. F344 male rats were given three subcutaneous (sc) injections of 1,2-dimethyl-hydrazine (DMH, 40 mg/kg b.w.) in one week followed by drinking water containing 1% dextran sod…	No
2-s2.0-36749003913	2008	In-stream processing of sediment-associated metals in peatland fluvial systems	The interaction between fluvially transported, metal contaminated peat particulates and acidic waters draining peatland catchments has received limited attention. Potential in-stream processing of sediment-associated metals in acidic stream water was investigated in laboratory based mixing experiments, designed to represent conditions of fluvial sediment transport in a highly contaminated and sev…	No
2-s2.0-37349030886	2008	Mineralization of salicylic acid in acidic aqueous medium by electrochemical advanced oxidation processes using platinum and boron-doped diamond as anode and cathodically generated hydrogen peroxide	Solutions containing 164 mg L-1 salicylic acid of pH 3.0 have been degraded by electrochemical advanced oxidation processes such as anodic oxidation, anodic oxidation with electrogenerated H2O2, electro-Fenton, photoelectro-Fenton and solar photoelectro-Fenton at constant current density. Their oxidation power has been comparatively studied in a one-compartment cell with a Pt or boron-doped diamo…	No
2-s2.0-36048934940	2008	Copper-pillared clays (Cu-PILC) for agro-food wastewater purification with H<inf>2</inf>O<inf>2</inf>	Copper-pillared clays (Cu-PILC) are effective and stable catalysts for the wet hydrogen peroxide catalytic oxidation (WHPCO) of waste in water. They are studied both in the conversion of model molecules (p-coumaric acid, p-hydroxybenzoic acid) and in the treatment of various real wastewaters from agro-food production: (i) deriving from citrus juice production, (ii) extracted concentrated polyphen…	No
2-s2.0-37349093017	2008	PepT1-Mediated Tripeptide KPV Uptake Reduces Intestinal Inflammation	Background & Aims: KPV is a tripeptide (Lys-Pro-Val), which possesses anti-inflammatory properties; however, its mechanisms of action still remain unknown. PepT1 is a di/tripeptide transporter normally expressed in the small intestine and induced in colon during inflammatory bowel disease (IBD). The aim of this study was to 1) investigate whether the KPV anti-inflammatory effect is PepT1-mediated…	No
2-s2.0-58149347624	2008	Preliminary observations on a highly-restricted tableland population of Green and Golden Bell Frogs on the Upper Molonglo River, NSW	The Green and Golden Bell Frog Litoria aurea disappeared from the Southern Tablelands of New South Wales in the early 1980's and despite many years of opportunistic survey, it was not until 1999 that it was rediscovered near the Upper Molonglo River east of Queanbeyan.The nearest known populations of the species occur at Kioloa, 85 km east of the site. In order to determine the distribution of th…	No
2-s2.0-38349101949	2008	Predicting estuarine sediment metal concentrations and inferred ecological conditions: An information theoretic approach	Empirically derived relationships associating sediment metal concentrations with degraded ecological conditions provide important information to assess estuarine condition. Resources limit the number, magnitude, and frequency of monitoring activities to acquire these data. Models that use available information and simple statistical relationships to predict sediment metal concentrations could pro…	No
2-s2.0-42549153683	2008	Evaluating carbon dynamics and microbial activity in arctic soils under warmer temperatures	A large portion of carbon (C) is stored in the world's soils, including those of peatlands, wetlands and permafrost. However, there is disagreement regarding the effects of climate change on the rate of organic matter decomposition in permafrost soils of the arctic. In this study it was hypothesized that soil exposed to a higher ambient temperature would have a greater flux of CO2 as well as a ch…	No
2-s2.0-39449126807	2008	Development, composition and age of indurated sand layers in the Late Quaternary coastal deposits of northern Moreton Bay, Queensland	Indurated sand in the Late Quaternary coastal plain succession of northern Moreton Bay was examined in sand-mine pits, drillcores and the eroded bank of an estuarine channel. Samples show that the cements usually coat grains and partially infill interstitial pores. Distinctive cement habits reflect different constituents that are dominantly kaolinite and amorphous organic-rich complexes. Trace-me…	No
2-s2.0-37348998904	2008	Nest distribution shaping within-stream variation in Atlantic salmon juvenile abundance and competition over small spatial scales	1. Spatial heterogeneity in population density is predicted to have important effects on population characteristics, such as competition intensity and carrying capacity. Patchy breeding distributions will tend to increase spatial heterogeneity in population density, whereas dispersal from breeding patches will tend to decrease it. The potential for dispersal to homogenize densities is likely to d…	No
2-s2.0-49149100383	2008	Macrofossil evidence for pre-settlement vegetation of Central Otago's basin floors and gorges	Composition of pre-settlement vegetation communities in the semi-arid Central Otago lowlands has been one of New Zealand's longstanding ecological puzzles. Uncertainty is due largely to a paucity of fossil data. Here, we provide new evidence for pre-settlement vegetation in the region based on analyses of plant macrofossils from 15 late Pleistocene and Holocene lowland sites. The assemblages repr…	No
2-s2.0-84904330884	2008	Chemical limnology and waterbird use of an Urban constructed Wetland	The Sackville Waterfowl Park is a 19-ha shallow freshwater constructed wetland located in Sackville, New Brunswick, Canada. The objectives of this ongoing study are to determine the relationships between chemical limnology, primary productivity, macroinvertebrate abundance and waterbird density in this urban wetland and if these change with increasing duration of flooding. Based on total phosphor…	No
2-s2.0-39749111920	2008	Development and demonstration of a free surface flow-dependent sampling technology	Statistical assessment of water quality data, obtained at the South Florida Water Management District (West Palm Beach, Florida) S-65E structure, illustrated significant differences and inconsistency in nutrient concentrations (Daas and Ebadian, 2003). The evaluation showed that currently used water sampling techniques are inadequate because of deficiencies in functionality and sensitivity to flo…	No
2-s2.0-39049093655	2008	In vitro leukocyte-encapsulation model in rainbow trout (Oncorhynchus mykiss)	We developed an in vitro model to study the cellular and molecular mechanisms of granulomatous inflammation in response to invading pathogens. Ichthyophonus hoferi was used as a target for encapsulation by cultivated leukocytes from the kidney of the rainbow trout (Oncorhynchus mykiss). The encapsulation process was observed over 1 week. The leukocytes were identified as either macrophages in the…	No
2-s2.0-66049100367	2008	Understanding sediment dynamics using geological and engineering approaches: A case study of the buffalo river area of concern, Buffalo, New York	A combination of geological and engineering approaches was applied to better understand sediment movement along a contaminated river bed and provide support for remediation decision making. The geological approach, using sediment trend analysis (STA) and sideâ€scan sonar mapping, helps interpret sedimentary processes acting over longer terms, while the engineering approach, based on a threeâ€di…	No
2-s2.0-55349119510	2008	Atmospheric patterns for heavy rain events in Calabria	This study investigates the atmospheric pattern circulations associated with heavy rainfall (HR) days in Calabria, southern Italy, and contributes to the understanding of the dynamical mechanisms that produce those events. Heavy rainfall days are extracted from the raingauge database of the \Protezione Civile Regionale\", which has more than a hundred pluviometric stations for the period 1999-200…	No
2-s2.0-85032770601	2008	Smart video surveillance for proactive security	An overview of smart video surveillance technologies and their applications specifically in the very busy area of Time Square in New York are summarized. The highly specialized techniques and algorithms used in a typical smart surveillance system includes plug-and-play analytics frameworks; object detection and tracking; object and color classification; alert definition and detection; database ev…	No
2-s2.0-49249120036	2008	Lithium deintercalation in LiFePO<inf>4</inf>nanoparticles via a domino-cascade model	Lithium iron phosphate is one of the most promising positive-electrode materials for the next generation of lithium-ion batteries that will be used in electric and plug-in hybrid vehicles. Lithium deintercalation (intercalation) proceeds through a two-phase reaction between compositions very close to LiFePO4 and FePO4. As both endmember phases are very poor ionic and electronic conductors, it is …	No
2-s2.0-38049160145	2008	Genesis of post-hotspot, A-type rhyolite of the Eastern Snake River Plain volcanic field by extreme fractional crystallization of olivine tholeiite	Rhyolites occur as a subordinate component of the basalt-dominated Eastern Snake River Plain volcanic field. The basalt-dominated volcanic field spatially overlaps and post-dates voluminous late Miocene to Pliocene rhyolites of the Yellowstone - Snake River Plain hotspot track. In some areas the basalt lavas are intruded, interlayered or overlain by âˆ¼15 km3 of cryptodomes, domes and flows of hi…	No
2-s2.0-38149101756	2008	Thermoeconomic analysis of pressurized hybrid SOFC systems with CO<inf>2</inf>separation	In this paper, the results of the thermodynamic and economic analyses of distributed power generation plants (1.5 MWe) are described and compared. The results of an exergetic analysis are also reported, as well as the thermodynamic details of the most significant streams of the plants. The integration of different hybrid solid oxide fuel cell (SOFC) system CO2 separation technologies characterize…	No
2-s2.0-84983078773	2008	Use of Quaternary travertines of central-southern Italy as archives of paleoclimate, paleohydrology and neotectonics	This paper reports how travertine of central-southern Italy, formed in response to the extensive circulation of waters inside the regional aquifer hosted in the Mesozoic carbonate sequences, can be used as a tool for paleoclimatic, neotectonic and paleohydrological investigations. CO2-rich thermal springs, CO2 vents and travertine are frequent occurrences of the peri-Tyrrhenian sector of central-…	No
2-s2.0-38649098486	2008	Organic-inorganic hybrid materials for flexible optical waveguide applications	Novel organic-inorganic hybrid materials of 3-acryloxypropyl trimethoxysilane and 4,4â€²-(hexafluoroisopropylidene)diphenol were synthesized by non-hydrolytic sol-gel processing. Thick, crack-free films were produced by spin-coating without high volume shrinkage during further treatment of the films. The optical properties of the materials were precisely tailored by adjusting the chemical composi…	No
2-s2.0-47749145364	2008	Wind tunnel test for vortex-induced vibration of vehicle-bridge system section model	Vortex-induced vibration of bridges happens at a relatively low wind speed and while vehicles often run on a bridge at that wind speed. Thus, it is necessary to study how the vehicles influence vortex-induced vibration of vehicle-bridge systems. Based on the project of Shanghai Bridge over Yangtse River, the wind tunnel test for vortex-induced vibrations of vehicle-bridge system of a 1:60 model i…	No
2-s2.0-38949130512	2008	Investigating agricultural sustainability and strategies in northern Mesopotamia: results produced using a socio-ecological modeling approach	Some of the most politically and culturally significant cities in first millennium BC northern Mesopotamia were located in agriculturally marginal landscapes. In order to sustain these settlements, variant cultivation techniques were practiced by local populations. Understanding the dynamics and implications of crop management practices requires that socio-ecological variables be addressed over r…	No
2-s2.0-47049113129	2008	Destabilization of laminar wall jet flow and relaminarization of the turbulent confined jet flow in axially rotating circular pipe	Destabilization and relaminarization phenomena have been investigated in an axially rotating circular duct. Standard k-Îµ model with modification for streamline curvature has been used in the numerical study. The laminar and turbulent velocity distributions at inlet have been observed to become turbulent and laminar, respectively, toward the exit of the pipe. A local velocity profile with parabol…	No
2-s2.0-35648935035	2008	Influence of aeration rate and biodegradability fractionation on composting kinetics	The influences of aeration rate and biodegradability fractionation on biodegradation kinetics during composting were studied. The first step was the design of a suitable lab-reactor that enabled the simulation of composting. The second step comprised of composting trials of six blends of sludge (originating from a food processing effluent) with wood chips using aeration rates of 1.69, 3.62, 3.25,…	No
2-s2.0-36549042545	2008	A kinetic study of the recovery of platinum ions from an artificial aqueous solution by immobilized Saccharomyces cerevisiae biomass	Biosorption has many advantages over conventional metal recovery processes such as chemical precipitation and electrowinning. One of these is the rapid rate at which the reaction occurs, resulting in the need for only short contact times for batch processing of aqueous metal-containing wastes. Factors such as metal concentration in solution, solution temperature and sorbent concentration all affe…	No
2-s2.0-40949146182	2008	Biodynamic modeling of PCB uptake by Macoma balthica and Corbicula fluminea from sediment amended with activated carbon	Activated carbon amendment was assessed in the laboratory as a remediation strategy for freshwater sediment contaminated with polychlorinated biphenyls (PCBs) from the Grasse River (near Massena, NY). Three end points were evaluated: aqueous equilibrium PCB concentration, uptake into semipermeable membrane devices (SPMDs), and 28-day bioaccumulation in the clam Corbicula fluminea. PCB uptake by w…	No
2-s2.0-40049109360	2008	Recent water level declines in the Lake Michigan-Huron system	Great Lakes water levels have fluctuated over thousands of years. High water levels were a problem in the 1980s, but a recent sudden drop in Lakes Michigan and Huron has caused particular concern, in part because lower water levels are consistent with many global climate change scenarios. We examined water level data (1860-2006) representing Lakes Michigan and Huron to evaluate changes in both lo…	No
2-s2.0-36749080520	2008	Water level variations in the Neuse and Pamlico Estuaries, North Carolina due to local and remote forcing	Water level time series records from the Neuse and Pamlico River Estuaries were statistically compared to local and distant wind field data, water level records within the Pamlico Sound and also coastal ocean sites to determine the relative contribution of each time series to water levels in the Neuse and Pamlico Estuaries. The objectives of this study were to examine these time series data using…	No
2-s2.0-36249003968	2008	Effectiveness of household reverse-osmosis systems in a Western U.S. region with high arsenic in groundwater	It is well known to the public in Lahontan Valley in rural Nevada, USA, that local aquifers produce water with varied, but sometimes very high concentrations of arsenic (> 4 ppm). As a result, many residents of the area have installed household reverse-osmosis (RO) systems to produce drinking water. We examined performance of RO systems and factors associated with arsenic removal efficiency in 59…	No
2-s2.0-38649098462	2008	Simultaneous determination of calcium and magnesium by derivative spectrophotometry in pharmaceutical products	First- and second-derivative spectrophotometric methods for the simultaneous determination of calcium and magnesium in their mixtures are described. The methods are based on the colored complexes formed by calcium and magnesium with bromopyrogallol red in presence of Tween 80 as a surfactant. The zero-crossing method has been utilized to measure the first- and second-derivative value of the deriv…	No
2-s2.0-41349098196	2008	Risk factors for polydrug use in a native American population	The Diagnostic Interview Schedule was used in 1993-1995 to collect information on the use of alcohol and other substances from 1,086 Navajo Indians living on or near their reservation in the southwestern United States. Bivariate and multivariate analyses are used to show that age of first alcohol use has declined over the past 50 years and is a significant risk factor for both alcohol dependence …	No
2-s2.0-38149031717	2008	Mitochondrial-mediated apoptosis in neural stem cells exposed to manganese	Manganese is an essential nutrient for humans that has to be maintained at proper levels for normal brain functioning. However, manganese also acts as a toxicant to the brain, and several studies have linked exposure to excessive manganese to neurotoxicity in adults. A recent report has suggested that ingesting high doses of manganese via drinking water can impede intellectual functions in childr…	No
2-s2.0-41349083177	2008	Exploring associations between perceived HCV status and injecting risk behaviors among recent initiates to injecting drug use in Glasgow	The aim of this study was to explore the influence of testing for hepatitis C virus (HCV) and perceived HCV status on injecting risk behavior. A cross-sectional, community-wide survey was undertaken at multiple sites throughout Greater Glasgow during 2001-2002. Four hundred ninety-seven injecting drug users (IDUs) consented to participate and were interviewed using a structured questionnaire to a…	No
2-s2.0-39649105236	2008	Risk of gastrointestinal disease associated with exposure to pathogens in the sediments of the Lower Passaic River	High levels of pathogenic microorganisms have been documented previously in waters of the Lower Passaic River in northern New Jersey. The purpose of this study was to characterize the microbial contamination of river sediments near combined sewer overflows (CSOs), a known source of pathogens. Concentrations of fecal coliform, total coliform, fecal Streptococcus, fecal Enterococcus, Pseudomonas ae…	No
2-s2.0-42449113366	2008	A screening method for toxicity identification evaluation on an industrial effluent using Chelex®-100 resin and chelators for specific metals	Toxicity of an industrial effluent was characterized using a toxicity identification method established at our research institute. Toxicity was evaluated using the Ceriodaphnia dubia survival test. The industrial effluent chosen in the present study had toxic effects on C. dubia before treatment. The effluent was first filtered to remove suspended solids (F-treatment). Activated charcoal was then…	No
2-s2.0-41149173027	2008	Uncertainty-based multiobjective optimization of groundwater remediation design	Management of groundwater contamination often involves conflicting objectives and substantial uncertainty. The primary objective of this paper is to present a new approach, called the probabilistic multiobjective genetic algorithm (PMOGA), which incorporates uncertainty with multiobjective Pareto optimization. This type of approach is needed for water resources problems with multiple uncertain ob…	No
2-s2.0-38949144413	2008	Enhanced biological nutrient removal by the alliance of a heterotrophic nitrifying strain with a nitrogen removing ecosystem	Nitrogen removal from synthetic wastewater was investigated in an airlift bioreactor (ALB), augmented with a novel heterotrophic nitrifier Pseudonocardia ammonioxydans H9T under organic carbon to nitrogen ratios (Corg/N) ranging from 0 to 12. Effect of the inoculated strain was also determined on the settling properties and the removal of chemical oxygen demand (COD). Two laboratory scale reactor…	No
2-s2.0-40349114597	2008	Glacial ecosystems	There is now compelling evidence that microbially mediated reactions impart a significant effect upon the dynamics, composition, and abundance of nutrients in glacial melt water. Consequently, we must now consider ice masses as ecosystem habitats in their own right and address their diversity, functional potential, and activity as part of alpine and polar environments. Although such research is a…	No
2-s2.0-38349076317	2008	Sediment size variation in torrents with check dams: Effects on riparian vegetation	Previously, we investigated the response of riparian vegetation to the installation of check dams along ephemeral Mediterranean rivers and we demonstrated significant changes in the form and structure of riparian vegetation around check dams that appeared to reflect changes in flow hydraulics and related fluvial sediment structures. In this paper we investigate the average properties of both bed …	No
2-s2.0-41449100096	2008	Optimum fish passage and guidance designs are based in the hydrogeomorphology of natural rivers	Understanding hydrodynamic cues used by outmigrating juvenile salmon (emigrants) to guide fine-scale swim path selection is critical to successful fish guidance and passage at man-made structures. We show how these cues can be inferred from channel features and complex flow fields of natural rivers through which emigrants pass. We then describe a new cue, 'total hydraulic strain', integrating pro…	No
2-s2.0-36048966591	2008	Influence of nitrite accumulation in association with seasonal patterns and mineralization of soil nitrogen in a semi-arid pine forest	To identify factors that influence the relatively high productivity of a semi-arid pine afforestation system in southern Israel, we investigated inorganic nitrogen deposition and mineralization for more than 2 years. To this end, we measured bulk and dry deposition, in situ N-mineralization over the seasonal cycle, and the potential activity of nitrifying microorganisms by soil slurry incubations…	No
2-s2.0-38649109187	2008	Discovery of a bipolar X-ray jet from the T Tauri star DG Tauri	Aims.We have obtained and analyzed Chandra ACIS-S observations of the strongly accreting classical T Tauri star DG Tau. Our principal goals are to map the immediate environment of the star to characterize possible extended X-rays formed in the jet, and to re-visit the anomalous, doubly absorbed X-ray spectrum of DG Tau itself. Methods.We combine our new ACIS-S data with a data set obtained previo…	No
2-s2.0-37048999753	2008	A new video segmentation method of moving objects based on blob-level knowledge	Variants of the background subtraction method are broadly used for the detection of moving objects in video sequences in different applications. In this work we propose a new approach to the background subtraction method which operates in the colour space and manages the colour information in the segmentation process to detect and eliminate noise. This new method is combined with blob-level knowl…	No
2-s2.0-39749182210	2008	Water quality monitoring following Hurricanes Katrina and Rita	Following the passage of Hurricane Katrina, New Orleans was left with 80% of its land area flooded. In some locations, the flood waters were over 30 feet deep. In the heat and stagnation, the waters quickly became heavily polluted. Pump out operations began in early September 2005 to get the city dried out quickly. Lake Pontchartrain was the primary receiving water body. A variety of approaches w…	No
2-s2.0-38849195518	2008	Use of microbial flocs generated from tilapia effluent as a nutritional supplement for shrimp, litopenaeus vannamei, in recirculating aquaculture systems	Recovering nutrients in a fish effluent to be used as a supplemental feed for shrimp culture could ease constraints (e.g., environmental issues and high production cost) that have limited the US shrimp farming industry in the past. In this study under laboratory scale conditions, fish effluent was collected from a commercial tilapia farm and nutrients from the waste stream were offered as supplem…	No
2-s2.0-38949123021	2008	Development of a regional model for integrated management of water resources at the basin scale	Integrated modeling is a novel approach to couple knowledge and models from different disciplines and research fields and to use their potential in the strategic planning of water management at the river basin scale. The MOSDEW integrated regional model has been developed in the Neckar basin, a 14,000 km2 river catchment in South-West Germany as a model cascade of nine submodels covering large sc…	No
2-s2.0-38049161845	2008	Hydrological consistency using multi-sensor remote sensing data for water and energy cycle studies	A multi-sensor/multi-platform approach to water and energy cycle prediction is demonstrated in an effort to understand the variability and feedback of land surface and atmospheric processes over large space and time scales. Remote sensing-based variables including soil moisture (from AMSR-E), surface heat fluxes (from MODIS) and precipitation rates (from TRMM) are combined with North American Reg…	No
2-s2.0-39649101293	2008	Historical profiles of chlorinated paraffins and polychlorinated biphenyls in a dated sediment core from Lake Thun (Switzerland)	A dated sediment core from Lake Thun covering the last 120 years was analyzed to get an overview of the historical trend of the chlorinated paraffin (CP) and polychlorinated biphenyl (PCB) deposition, because CPs and PCBs have/had similar applications as plasticizers and flame retardants. Total CP concentrations (sum of short chain (SCCP), medium chain (MCCP), and long chain CPs (LCCP)) showed a …	No
2-s2.0-37549048655	2008	Use of an integrated flow model to estimate ecologically relevant hydrologic characteristics at stream biomonitoring sites	We developed an integrated hydroecological model to provide a comprehensive set of hydrologic variables representing five major components of the flow regime at 856 aquatic-invertebrate monitoring sites in New Jersey. The hydroecological model simulates streamflow by routing water that moves overland and through the subsurface from atmospheric delivery to the watershed outlet. Snow accumulation a…	No
2-s2.0-39449100349	2008	Environmental impact assessment and control of pharmaceuticals: The role of environmental agencies	In 2005, the new legislation for pharmaceuticals came into effect. Since then environmental risk assessments are required for all new marketing authorisation applications. The German Federal Environment Agency has been assessing the environmental impact of 136 veterinary and 134 human pharmaceuticals. The authorisation of pharmaceuticals has shown that the authorisation of some groups of substanc…	No
2-s2.0-38349082658	2008	Biosorption properties of extracellular polymeric substances (EPS) towards Cd, Cu and Pb for different pH values	The aim of this study was to assess the influence of pH on the metal biosorption of extracellular polymeric substances (EPS) extracted from two different activated sludges called A and B. The composition and physico-chemical characteristics of EPS were determined. The biosorption capacities of the EPS were examined at pH 4, 6, 7 and 8 successively with three metals Cu, Pb and Cd using differentia…	No
2-s2.0-40749091199	2008	Lead release from new end-use plumbing components in Seattle public schools	Field sampling and laboratory studies were conducted to investigate lead release from new end-use components used in drinking water fountains in Seattle (Wash.) Public Schools. Analysis of sequential small-volume samples collected at 22 sources found high lead concentrations in water that was left standing overnight. Results showed significant lead release at or near bubbler heads and at another …	No
2-s2.0-39749136161	2008	Ma-LMM01 infecting toxic Microcystis aeruginosa illuminates diverse cyanophage genome strategies	Cyanobacteria and their phages are significant microbial components of the freshwater and marine environments. We identified a lytic phage, Ma-LMM01, infecting Microcystis aeruginosa, a cyanobacterium that forms toxic blooms on the surfaces of freshwater lakes. Here, we describe the first sequenced freshwater cyanomyovirus genome of Ma-LMM01. The linear, circularly permuted, and terminally redund…	No
2-s2.0-40849085600	2008	Persistent elevated nitrate in a riparian zone aquifer	Streamside vegetated buffer strips (riparian zones) are often assumed to be zones of ground water nitrate (NO3-) attenuation. At a site in southwestern Ontario (Zorra site), detailed monitoring revealed that elevated NO3--N (4-93 mg L-1) persisted throughout a 100-m-wide riparian floodplain. Typical of riparian zones, the site has a soil zone of recent river alluvium that is organic carbon (OC) r…	No
2-s2.0-38849187961	2008	GIS-based colour composites and overlays to delineate heavy metal contamination zones in the shallow alluvial aquifers, Ankaleshwar industrial estate, south Gujarat, India	In an attempt to delineate heavy metal contamination precincts and to evaluate the extent and degree of toxic levels, besides their possible sources, 38 water samples from Ankaleshwar Industrial Estate, south Gujarat, India were analyzed. By clutching geochemical analyses and GIS-based colour composites areas depicting anomalously high concentration of heavy metals (Mo, Zn, Pb, Ni, Co, Cd, etc.) …	No
2-s2.0-40549095281	2008	Novel membrane pretreatment to increase the efficiency of ozonation-biooxidation	The effects of membrane pretreatment on the ozonation and ozone-biotreatment of the wastewater from the alkaline bleach plant of Kraft pulp mills were investigated. Membrane pretreatment involved using a ceramic membrane with nominal cutoff of 1,000 gmol, that separated organics based on their molar mass and structure. The retentate stream, consisting of concentrated high molar mass organics, was…	No
2-s2.0-39549107567	2008	Endosulfan induces oxidative stress and changes on detoxication enzymes in the aquatic macrophyte Myriophyllum quitense	Endosulfan (1) is a chlorinated insecticide still in use in both developed and emerging countries. Although its toxicity on animals has been studied in the last years, scarce information is available on its effects on plants. In this study, we exposed the aquatic macrophyte Myriophyllum quitense to environmentally relevant concentrations of endosulfan (Î¼g/L) (1) for a short time, simulating expo…	No
2-s2.0-40149085736	2008	Methodology for comparing source and plume remediation alternatives	It is often difficult at contaminated sites to decide whether remediation effort should be focused on the contaminant source, the dissolved plume, or on both zones. The decision process at these sites is hampered by a lack of quantitative tools for comparing remediation alternatives. A new screening-level mass balance approach is developed for simulating the transient effects of simultaneous grou…	No
2-s2.0-38749103933	2008	Improvement of COD and color removal from UASB treated poultry manure wastewater using Fenton's oxidation	The applicability of Fenton's oxidation as an advanced treatment for chemical oxygen demand (COD) and color removal from anaerobically treated poultry manure wastewater was investigated. The raw poultry manure wastewater, having a pH of 7.30 (Â±0.2) and a total COD of 12,100 (Â±910) mg/L was first treated in a 15.7 L of pilot-scale up-flow anaerobic sludge blanket (UASB) reactor. The UASB reactor…	No
2-s2.0-44449124815	2008	Chryseobacterium aquifrigidense sp. nov., isolated from a water-cooling system	A non-motile, yellow-pigmented bacterium, designated strain CW9T, was isolated from a water-cooling system in Gwangyang, Republic of Korea. The cells were Gram-negative, catalase- and oxidase-positive, short rods. The major fatty acids were iso-C15:0 (45.5%), iso-C17:1Ï‰9c (14.4 %), iso-C17:0 3-OH (13.0 %) and summed feature 3 (comprising iso-C15:0 2-OH and/or C16:1Ï‰7c; 8.8 %). The DNA G+C conte…	Yes,On the basis of the evidence presented in this study, strain CW9T represents a novel species of the genus Chryseobacterium, for which the name Chryseobacterium aquifrigidense sp. nov. is proposed
2-s2.0-38949147448	2008	Mutual monitoring in a tradable water rights system: A case study of Zhangye City in Northwest China	Tradable water right systems are becoming important ways to achieve distributive efficiency in water resources. In 2002, China's Ministry of Water Resources initiated a pilot project in Zhangye City in Northwest China. The project was designed to establish a new water use rights system with tradable water quotas with the hope of reallocating water resources more efficiently through market-based i…	No
2-s2.0-40849142609	2008	Hydrogen peroxide production in marine bathing waters: Implications for fecal indicator bacteria mortality	Hydrogen peroxide concentrations [H2O2] have been measured over the last two decades in multiple studies in surface waters in coastal, estuarine and oceanic systems. Diurnal cycles consistent with a photochemical production process have frequently being observed, with [H2O2] increasing by two orders of magnitude over the course of the day, from low nM levels in the early morning to 102 nM in late…	No
2-s2.0-40149090359	2008	Biodegradation in contaminated aquifers: Incorporating microbial/molecular methods	In order to evaluate natural attenuation in contaminated aquifers, there has been a recent recognition that a multidisciplinary approach, incorporating microbial and molecular methods, is required. Observed decreases in contaminant mass and identified footprints of biogeochemical reactions are often used as evidence of intrinsic bioremediation, but characterizing the structure and function of the…	No
2-s2.0-39249085563	2008	Test results of a newly proposed neutralization process to reduce and utilize the sludge	Sludge from AMD is difficult to handle and dispose, because of the contained toxic substances, such as arsenic, cadmium, etc. To reduce the sludge, the bacterial oxidation and two step neutralization process was proposed and tested by a bench scale plant. The test was carried out by treating the AMD from the abandoned Horobetsu sulfur mine in Japan, which contains about 300 mg/L ferrous ion and 1…	No
2-s2.0-39749094420	2008	Structure of the receptor-binding protein of bacteriophage Det7: A podoviral tail spike in a myovirus	A new Salmonella enterica phage, Det7, was isolated from sewage and shown by electron microscopy to belong to the Myoviridae morphogroup of bacteriophages. Det7 contains a 75-kDa protein with 50% overall sequence identity to the tail spike endorhamnosidase of podovirus P22. Adsorption of myoviruses to their bacterial hosts is normally mediated by long and short tail fibers attached to a contracti…	No
2-s2.0-40849147486	2008	Nitrogen loss through lateral seepage in near-trench paddy fields	A near-trench paddy field experiment with five urea application rates (0-360 kg N ha-1 in 90-kg increments) was conducted on a paddy soil in the Taihu Lake Region of China to elucidate N losses through lateral seepage during three rice (Oryza sativa L.) growing seasons. The total N (N t), NH4 +-N, and NO3 --N concentrations in the latetal seepage water increased with increasing N rates. The seaso…	No
2-s2.0-45249100639	2008	Improved turbulence profiling with field-adapted acoustic Doppler velocimeters using a bifrequency Doppler noise suppression method	A novel noise reduction method and corresponding technique are presented for improving turbulence measurements with acoustic Doppler velocimeters (ADVs) commonly used in field studies of coastal and nearshore regions, rivers, lakes, and estuaries. This bifrequency method is based on the decorrelation of the random and statistically independent Doppler noise terms contained in the Doppler signals …	No
2-s2.0-42549163351	2008	Cationic pathway of pH regulation in larvae of Anopheles gambiae	Anopheles gambiae larvae (Diptera: Culicidae) live in freshwater with low Na+ concentrations yet they use Na+ for alkalinization of the alimentary canal, for electrophoretic amino acid uptake and for nerve function. The metabolic pathway by which larvae accomplish these functions has anionic and cationic components that interact and allow the larva to conserve Na+ while excreting H+ and HCO3-. Th…	No
2-s2.0-42649125567	2008	Analysis on Jinghe watershed vegetation dynamics and evaluation on its relation with precipitation	Vegetation degradation is one of the key subjects in the study of global environmental changes, and the Normalized Difference Vegetation Index (NDVI) is generally recognized as a good indicator of terrestrial vegetation productivity and growth status. To evaluate the vegetation dynamic changes in the Jinghe watershed on Loess plateau from 1982 to 2003, major methods of change slope, principal com…	No
2-s2.0-39549098334	2008	Integrated frequency analysis of extreme flood peaks and flood volumes using the regionalized quantiles of rainfall depths as auxiliary variables	In its 1988 report, the U.S. National Research Council identified principles to be followed in order to improve estimation of extreme flood quantiles. In spite of the many advances attained by more recent research on extreme flood estimation, the NRC principles remain useful recommendations to be considered, which are used in the methodology to be described herein. According to the proposed metho…	No
2-s2.0-41149117597	2008	Spatiotemporal vegetation cover variations in the Qinghai-Tibet Plateau under global climate change	Empirical Orthogonal Function (EOF) analysis and the related Principal Components (PC) analysis are used to extract valuable vegetation cover derived information from the National Oceanic and Atmospheric Administration (NOAA-AVHRR)'s Leaf Area Index (LAI) satellite images. Results suggest that from 1982 to 2000 global climate change has contributed to an increase in vegetation cover in the Qingha…	No
2-s2.0-40849147537	2008	A Legionnaires' disease outbreak: A water blaster and roof-collected rainwater systems	In February 2006, an outbreak of Legionnaires' disease (LD) was identified in Beachlands, a small, isolated east Auckland suburb. It was investigated through case finding, a case-control study, sampling potential sources of infection and by molecular typing (using sequence-based typing (SBT) of all Legionella pneumophila serogroup 1 (Lp1) isolates). Lp1 was isolated from the respiratory tract of …	Yes, first outbreak of LD linked to roof-collected rainwater supplies and the first isolation of Legionella from these systems in New Zealand
2-s2.0-40949130480	2008	Assessment of exposure risk of polychlorinated biphenyls to interior least terns (Sterna antillarum)	Risk of polychlorinated biphenyl (PCB) exposure and effects were assessed for a colony of federally endangered interior least terns (Sterna antillarum) nesting on the Bitter Lake National Wildlife Refuge (NM, USA). The colony feeds from an area on the Refuge (Hunter Marsh/Oxbow Complex) wherein fish with elevated concentrations of total PCBs have been documented. Concentrations of total PCBs in w…	No
2-s2.0-40949123171	2008	Micronucleus test in fish genome: A sensitive monitor for aquatic pollution	The aquatic environment makes up the major part of our environment and resources, therefore its safety is directly related to the safety our health. In this study, three tilapia species (Oreochromis niloticus, Oreochromis aureus and Tilapia zilli) and Clarias gariepinus were employed to estimate water pollution using micronucleus (MN) test. The test has been used successfully as a mutagenic assay…	No
2-s2.0-40149088939	2008	Rapid on-chip multi-step (bio)chemical procedures in continuous flow - Manoeuvring particles through co-laminar reagent streams	We introduce a novel and extremely versatile microfluidic platform in which tedious multi-step biochemical processes can be performed in continuous flow within a fraction of the time required for conventional methods. Â© The Royal Society of Chemistry.	No
2-s2.0-38349145644	2008	A new stochastic model of episode peak and duration for eco-hydro-climatic applications	Long series of observations on environmental processes provide a baseline record to better gauge recent episodes relative to prior ones. In this context, episodes are consecutive observations either above or below a reference level. Such episodes can be quantified in terms of three random variables: duration (the number of time intervals in the episode), magnitude (the sum of all process values f…	No
2-s2.0-41849135739	2008	Charting a path for innovative toilet technology using multicriteria decision analysis	Practical and theoretically sound methods for analyzing innovative environmental technologies are needed to inform public and private decisions regarding research and development, risk management, and stakeholder communication. By integrating scientific assessments with a characterization of values, multicriteria decision analysis (MCDA) supports the ranking of alternative technology pathways on …	No
2-s2.0-43449132102	2008	Sources and fluxes of atmospheric trace elements to the Gulf of Aqaba, Red Sea	We present the first comprehensive investigation of the concentrations, fluxes and sources of aerosol trace elements over the Gulf of Aqaba. We found that the mean atmospheric concentrations of crustally derived elements such as Al, Fe and Mn (1081, 683, and 16.7 ng m<sup>-3</sup>) are about 2-3 times higher than those reported for the neighboring Mediterranean area. This is indicative of the dom…	No
2-s2.0-41449083866	2008	Catalytic intermolecular linear allylic C-H amination via heterobimetallic catalysis	A novel heterobimetallic Pd(II)sulfoxide/(salen)Cr(III)Cl-catalyzed intermolecular linear allylic C-H amination (LAA) is reported. This reaction directly converts densely functionalized Î±-olefin substrates (1 equiv) to linear (E)-allylic carbamates with good yields and outstanding regio- and stereoselectivities (>20:1). Chiral bis-homoallylic and homoallylic oxygen, nitrogen, and carbon substitu…	No
2-s2.0-44449128052	2008	Benthic Foraminiferal response to sea level change in the mixed siliciclastic-carbonate system of southern Ashmore Trough (Gulf of Papua)	Ashmore Trough in the western Gulf of Papua (GoP) represents an outstanding modern example of a tropical mixed siliciclastic-carbonate depositional system where significant masses of both river-borne silicates and bank-derived neritic carbonates accumulate. In this study, we examine how benthic foraminiferal populations within Ashmore Trough vary in response to sea level-driven paleoenvironmental…	No
2-s2.0-47249117943	2008	Azonexus hydrophilus sp. nov., a nifH gene-harbouring bacterium isolated from freshwater	Three Gram-negative, non-pigmented, rod-shaped, facultatively aerobic bacterial strains, designated d8-1T, d8-2 and IMCC1716, were isolated from a freshwater spring sample and a eutrophic freshwater pond. Based on characterization using a polyphasic approach, the three strains showed highly similar phenotypic, physiological and genetic characteristics. All of the strains harboured the nitrogenase…	Yes, novel species of the genus Azonexus, for which the name Azonexus hydrophilus sp. nov. is proposed
2-s2.0-47249141988	2008	Yersinia massiliensis sp. nov., isolated from fresh water	Two bacterial organisms, 50640T and 823, were isolated from fresh water in Marseilles, France, and were further identified as members of the genus Yersinia on the basis of their phenotypic characteristics and 16S rRNA gene sequencing. Their unique phenotypic profile differed from that of closely related species of Yersinia bercovieri and Yersinia mollaretii by exhibiting positive indole and inosi…	Yes, two isolates represent a so far undescribed Yersinia species. he name Yersinia massiliensis sp. nov. is proposed for this new taxon (type strain 50640T=CIP 109351T=CCUG 53443T; isolate 823=CIP 109352=CCUG 53444). Â© 2008 IUMS.
2-s2.0-40949133265	2008	Physiological changes and molluscicidal effects of crude latex and Milin on Biomphalaria glabrata	Euphorbian latex is commonly used as molluscicides and the Euphorbia milii latex was reported as most powerful molluscicidal agents. The physiological and lethal effects of the latex components of Euphorbia milii, on the intermediate host Biomphalaria spp., of the human liver parasite Schistosoma mansoni were described in this study. The standard methodologies for testing plant derived molluscici…	No
2-s2.0-45849106858	2008	Use of synchronous fluorescence spectra to estimate biochemical oxygen demand (BOD) of urban rivers affected by treated sewage	Synchronous fluorescence spectra and the first derivative spectra of urban rivers affected by treated sewage were studied to find the optimum index for biochemical oxygen demand (BOD) estimation. In addition, various sample treatment methods as well as the multiple regression method using available monitoring parameters were examined to improve the BOD estimation capability of the indices. From J…	No
2-s2.0-46249094236	2008	High vertical resolution sampling in density interfaces of estuaries and river plumes	One of the most common procedures for studying the physical and biochemical processes in highly stratified areas, such as estuaries or river plumes (which can be very thin surface layers), is to take water samples and analyze them in a laboratory. To acquire samples in these areas with enough vertical resolution to describe the major changes in the physical and biochemical parameters that can occ…	No
2-s2.0-40549115622	2008	Outdoor air PCB concentrations in three communities along the Upper Hudson River, New York	Outdoor air polychlorinated biphenyl (PCB) concentrations were measured in upstate New York as part of a nonoccupational exposure investigation. The adjacent study communities of Hudson Falls and Fort Edward contain numerous sites of current and former PCB contamination, including two capacitor-manufacturing facilities. Outdoor air PCB concentrations in the study municipalities were significantly…	No
2-s2.0-41349092759	2008	Inferring hydro-geothermal parameters from advectively perturbed thermal logs	We present techniques to infer thermo-hydraulic parameters from the analysis of underground temperature data from boreholes. Two different cases are analyzed: thermal data from artesian wells and from boreholes drilled in unconfined aquifers. The former allow the assessment of the formation temperature gradient and the flow volume; the latter give estimates of the Darcy velocity and, consequently…	No
2-s2.0-46749090896	2008	Calibrating virtual population analysis for fisheries stock assessment	Virtual population analysis (VPA) is often used for assessing freshwater and marine fisheries resources. One important component in VPA is to calibrate abundance estimates with a time series of abundance indices. One of the commonly used calibration processes usually includes simultaneous estimation of cohort sizes across all ages and years. This reduces the flexibility of the model in accounting…	No
2-s2.0-55349083680	2008	Design, production and testing of a titanium exhaust duct for noise and weight reduction	Helicopter exhausts are usually basic components not yet developed to achieve the best noise reduction performance. This needs to change to continue complying with ever more restrictive noise regulations, A more efficient acoustic design could be reached using a complex configuration with assembly of multiple walls and 3D optimized geometry. As the exhausts nozzle are usually built out of Ni base…	No
2-s2.0-41149138743	2008	Emplacement of multiple magma sheets and wall rock deformation: Trachyte Mesa intrusion, Henry Mountains, Utah	A detailed structural and rock magnetic study of the Trachyte Mesa intrusion and deformed sedimentary wall rocks, Henry Mountains, Utah, indicates that the intrusion grew vertically and horizontally by the accumulation of multiple horizontal magma sheets. 2-3 cm thick shear zones recognized by intensely cataclasized plagioclase phenocrysts define the contact between sheets. Sheets have bulbous an…	No
2-s2.0-40949141352	2008	Paclitaxel associated with cholesterol-rich nanoemulsions promotes atherosclerosis regression in the rabbit	A cholesterol-rich nanoemulsion (LDE) that resembles LDL binds to the LDL receptors and after injection into the blood stream may concentrate in cells with LDL receptor overexpression, as occurs in neoplasias and other proliferative processes. Thus, LDE can be used as vehicle to target drugs against those cells. The current study was designed to verify in rabbits whether LDE concentrates in the l…	No
2-s2.0-43149108397	2008	Lakebogaite, CaNaFe<inf>2</inf><sup>3+</sup>H (UO<inf>2</inf>)<inf>2</inf>(PO<inf>4</inf>)<inf>4</inf> (OH)<inf>2</inf>(H<inf>2</inf>O)<inf>8</inf>, a new uranyl phosphate with a unique crystal structure from Victoria, Australia	Lakebogaite, ideally CaNaFe23+H (UO2)2(PO4)4 (OH)2(H2O)8, is a new Ca-Na-Fe uranyl phosphate mineral from a quarry in Upper Devonian granite near Lake Boga, northern Victoria, Australia. It is associated with Na-analogue of meurigite (IMA 2007-024), torbernite, and salÃ©eite on a matrix of microcline, albite, smoky quartz, and muscovite. Lakebogaite occurs as bright lemon-yellow transparent prism…	No
2-s2.0-43049113488	2008	Toxicity of five therapeutic compounds on juvenile salmonids	Toxicity levels of therapeutic compounds used in aquaculture may vary depending on fish size and species, water quality, concentration of the compound, and duration of exposure. Two different sizes (2.0 and 10.0 g) of three salmonids (rainbow trout Oncorhynchus mykiss, coho salmon O. kisutch, and Chinook salmon O. tshawytscha) were given immersion treatments with formalin, potassium permanganate,…	No
2-s2.0-40249096064	2008	Shallow DOF-based particle tracking velocimetry applied to horizontal bubbly wall turbulence	To investigate the effect of microbubble injection into a turbulent boundary layer, we measure the velocity fields of gas-liquid two-phase flow in a horizontal water channel with a Particle Tracking Velocimetry (PTV) technique. In this study, we focus on a thin shear layer where the Reynolds shear stress is the highest. The effect of the shallow focal depth-of-field (DOF) in a lens system assists…	No
2-s2.0-42649109113	2008	Caffeine blocks disruption of blood brain barrier in a rabbit model of Alzheimer's disease	High levels of serum cholesterol and disruptions of the blood brain barrier (BBB) have all been implicated as underlying mechanisms in the pathogenesis of Alzheimer's disease. Results from studies conducted in animals and humans suggest that caffeine might be protective against Alzheimer's disease but by poorly understood mechanisms. Using rabbits fed a cholesterol-enriched diet, we tested our hy…	No
2-s2.0-40649103829	2008	Improved fatty acid detection in micro-algae and aquatic meiofauna species using a direct thermal desorption interface combined with comprehensive gas chromatography-time-of-flight mass spectrometry	Comprehensive two-dimensional gas chromatography (GC Ã— GC) with time-of-flight mass spectrometry detection is used to profile the fatty acid composition of whole/intact aquatic microorganisms such as the common fresh water green algae Scenedesmus acutus and the filamentous cyanobacterium Limnothrix sp. strain MRI without any sample preparation steps. It is shown that the technique can be useful …	No
2-s2.0-41849131457	2008	Climate change, drought and groundwater availability in southern Italy	Data for the period 1821 to 2003 from 126 rain gauges, 41 temperature gauges, eight river discharge gauges and 239 wells, located in southern Italy, have been analysed to characterize the effect of recent climate change on availability of water resources, focusing on groundwater resources. Regular data are available from 1921 to 2001. Many analysis methods are used: principal component analysis, …	No
2-s2.0-41849116643	2008	Microwave discharge electrodeless lamps (MDEL). III. A novel tungsten-triggered MDEL device emitting VUV and UVC radiation for use in wastewater treatment	Exposure to low doses of the xenoestrogen bisphenol A (BPA) and to the hormonal 2,4-dichlorophenoxyacetic acid (2,4-D) herbicide, an environmental endocrine disruptor, can have serious health consequences such as the induction of mammary gland ductal hyperplasias and carcinoma (LaChapelle et al., Reprod. Toxicol., 2007, 23, 20; Murray et al., Reprod. Toxicol., 2007, 23, 383). To the extent that t…	No
2-s2.0-43349158914	2008	A simple and efficient method for extraction of genomic DNA from tropical tuber crops	DNA extraction in many plants is difficult because of metabolites that interfere with DNA isolation procedures and subsequent applications, such as DNA restriction, amplification and cloning. We have developed a reliable and efficient method for isolating genomic DNA free from polysaccharide, polyphenols and protein contaminants from tropical tuber crops (Elephant foot yam, Cassava, Sweet potato …	No
2-s2.0-43749115368	2008	Streamlining tasks and roles to expand treatment and care for HIV: Randomised controlled trial protocol	Background: A major barrier to accessing free government-provided antiretroviral treatment (ART) in South Africa is the shortage of suitably skilled health professionals. Current South African guidelines recommend that only doctors should prescribe ART, even though most primary care is provided by nurses. We have developed an effective method of educational outreach to primary care nurses in Sout…	No
2-s2.0-45849118327	2008	Appearance of novel G-bacteria belonging to Acidobacteria in a dairy wastewater treatment plant	A dairy wastewater treatment plant operates a sequencing batch reactor (SBR) and stimulates enhanced biological phosphorus removal (EBPR) process with alternating anaerobic and aerobic cycles. Occasionally, the plant suffers from a high suspended solids problem in the supernatant. Interestingly, the occurrence of high suspended solids coincided with times when the EBPR process failed to remove ph…	No
2-s2.0-42549115153	2008	Geochemical quantification of semiarid mountain recharge	Analysis of a typical semiarid mountain system recharge (MSR) setting demonstrates that geochemical tracers help resolve the location, rate, and seasonality of recharge as well as ground water flowpaths and residence times. MSR is defined as the recharge at the mountain front that dominates many semiarid basins plus the often-overlooked recharge through the mountain block that may be a significan…	No
2-s2.0-44949099399	2008	Modeling of processes in subsurface flow constructed wetlands: A review	Constructed wetlands (CWs) provide a natural way for simple, inexpensive, and robust wastewater treatment. Detailed understanding of CW functioning is difficult, because a large number of physical, chemical, and biological processes occur in parallel and influence each other. For this reason, CWs have long been seen as \black boxes\" where wastewater enters and treated water leaves the system. Nu…	No
2-s2.0-41949084794	2008	Pressure-assisted chelation extraction of lead from contaminated soil	Soil contamination by metallic elements including lead occurs frequently. Contaminant metals in soil pose a serious risk to public health and groundwater supplies. Extraction using chelants is seen as a remediation option; however, it is often hampered by access to the contaminants that are shielded by the soil matrix. We have developed a novel extraction technique that utilizes a mildly elevated…	No
2-s2.0-42949145478	2008	Evaluation of a novel access and closure device for NOTES applications: a transcolonic survival study in the porcine model (with video)	Background: Natural orifice transluminal endoscopic surgery (NOTES) is a novel, potentially less invasive alternative to laparoscopic surgery. However, the problems of transluminal access and closure represent significant obstacles to its successful introduction in humans. Objective: Our purpose was to evaluate the feasibility and safety of a novel device designed for transluminal access and clos…	No
2-s2.0-43649087569	2008	Effects of surface water on protein dynamics studied by a novel coarse-grained normal mode approach	Normal mode analysis (NMA) has received much attention as a direct approach to extract the collective motions of macromolecules. However, the stringent requirement of computational resources by classical all-atom NMA limits the size of the macromolecules to which the method is normally applied. We implemented a novel coarse-grained normal mode approach based on partitioning the all-atom Hessian m…	No
2-s2.0-40849126490	2008	Possible carcinogenic risks of copper gluconate and their prevention by co-administered green tea catechins evaluated by a rat medium-term multi-organ carcinogenicity bioassay protocol	Carcinogenic risks of copper gluconate, green tea catechins and their combined exposure were evaluated using a rat medium-term multi-organ carcinogenicity bioassay protocol. Male BrlHan:WIST@Jcl (GALAS) rats were given N-nitrosodiethylamine (DEN), N-methylnitrosourea (MNU), 1,2-dimethylhydrazine (DMH), N-butyl-N-(4-hydroxybutyl)nitrosamine (BBN) and 2,2â€²-dihydroxy-di-n-propylnitrosamine (DHPN) …	No
2-s2.0-43949145234	2008	Application of SEBAL model for mapping evapotranspiration and estimating surface energy fluxes in South-Central Nebraska	Knowledge of spatiotemporal distribution of evapotranspiration (ET) on large scales, as quantified by satellite remote sensing techniques, can provide important information on a variety of water resources issues such as evaluating water distributions, water use by different land surfaces, water allocations, water rights, consumptive water use and planning, and better management of ground and surf…	No
2-s2.0-42449136187	2008	Use of sinkhole and specific capacity distributions to assess vertical gradients in a karst aquifer	The carbonate-rock aquifer in the Great Valley, West Virginia, USA, was evaluated using a database of 687 sinkholes and 350 specific capacity tests to assess structural, lithologic, and topographic influences on the groundwater flow system. The enhanced permeability of the aquifer is characterized in part by the many sinkholes, springs, and solutionally enlarged fractures throughout the valley. Y…	No
2-s2.0-36048958627	2008	Determination of fish origin by using 16S rDNA fingerprinting of bacterial communities by PCR-DGGE: An application on Pangasius fish from Viet Nam	The determination of geographical origin is a demand of the traceability system of import-export food products. One hypothesis of tracing the source of a product is by analysing in a global way the bacterial communities of the food samples after their exportation. For this purpose, molecular techniques employing 16S rDNA profiles generated by PCR-DGGE were used to detect the variation in bacteria…	No
2-s2.0-44449140989	2008	Comparative analysis of distribution and abundance of West Nile and eastern equine encephalomyelitis virus vectors in Suffolk County, New York, using human population density and land use/cover data	Five years of CDC light trap data from Suffolk County, NY, were analyzed to compare the applicability of human population density (HPD) and land use/cover (LUC) classification systems to describe mosquito abundance and to determine whether certain mosquito species of medical importance tend to be more common in urban (defined by HPD) or residential (defined by LUC) areas. Eleven study sites were …	No
2-s2.0-43049096078	2008	Bipolar pulsed electrical discharge for decomposition of organic compounds in water	This work focuses on the development of an underwater plasma source that may open new possibilities in wastewater treatment processes by enabling the operation of the discharge under relatively low discharge voltages (sub-kV region). For this purpose, two systems, based on a wire-to-wire electrode configuration: (i) with and (ii) without gas bubbling, were designed. Both systems were operated uti…	No
2-s2.0-43049149363	2008	Genomic insights into Mn(II) oxidation by the marine alphaproteobacterium Aurantimonas sp. strain SI85-9A1	Microbial Mn(II) oxidation has important biogeochemical consequences in marine, freshwater, and terrestrial environments, but many aspects of the physiology and biochemistry of this process remain obscure. Here, we report genomic insights into Mn(II) oxidation by the marine alphaproteobacterium Aurantimonas sp. strain SI85-9A1, isolated from the oxic/anoxic interface of a stratified fjord. The SI…	No
2-s2.0-45149100900	2008	Study of zooplankton emergence pattern and resting egg diversity of recently dried waterbodies in North Maharashtra Region	Seasonal patterns of temperature, pH, conductivity, dissolved oxygen, phosphate and sulphate have been studied on the basis of physico-chemical characteristics of pond ecosystem. Importance of soil egg banks and their contribution to the diversity in freshwater ecosystem has been studied. We have focussed our attention on soil egg bank diversity and zooplankton emergence patterns of some recently…	No
2-s2.0-41849132777	2008	Temporal trends and spatial variability of mercury in four fish species in the Ontario segment of the St. Lawrence River, Canada	The Massena (New York) and Cornwall (Ontario) region has a long history of Hg discharge into the St. Lawrence River. The objectives of this study were to evaluate if Hg levels have declined in this portion of the river since 1975 and to compare Hg level in fish species upstream and downstream of this area in order to evaluate the anthropogenic contribution to Hg levels in fish. Mercury levels in …	No
2-s2.0-45249105316	2008	Summer distribution and growth of juvenile coho salmon during colonization of newly accessible habitat	Pacific salmon Oncorhynchus spp. are capable of exploiting vacant habitat, but most research has focused on straying and colonization by adults. However, dispersal of juveniles of stream-rearing species, such as coho salmon O. kisutch, may also be an important component of colonization. Installation of fish passage structures on the Cedar River, Washington, and subsequent adult migration into the…	No
2-s2.0-47249153492	2008	Olivine inclusions in Siberian diamonds: High-precision approach to minor elements	The geochemistry of mineral inclusions in diamonds is an important source of information on the composition of continental lithospheric mantle at depths exceeding 120-150 km. At these depths two main types of geological environment support diamond formation: they are ultramafic (or peridotitic) (U-type) and eclogitic (E-type) environments as shown by minerals that occur as inclusions in diamonds …	No
2-s2.0-45849147390	2008	A novel approach for representing ice microphysics in models: Description and tests using a kinematic framework	This paper documents the development of a novel approach for representing ice microphysics in numerical models. In this approach, the ice particle mass-dimension and projected-area-dimension relationships vary as a function of particle size and rimed mass fraction. All ice microphysical processes and parameters are calculated in a self-consistent manner in terms of these mass-dimension and area-d…	No
2-s2.0-44449123258	2008	BRCA-Fa pathway as a target for anti-tumor drugs	Promising research on DNA repair signaling pathways predicts a new age of anti-tumor drugs. This research was initiated through the discovery and characterization of proteins that functioned together in signaling pathways to sense, respond, and repair DNA damage. It was realized that tumor cells often lacked distinct DNA repair pathways, but simultaneously relied heavily on compensating pathways.…	No
2-s2.0-42049106420	2008	Comparison of wetland and agriculture drainage as sources of biochemical oxygen demand to the San Joaquin River, California	For many years, the San Joaquin River (SJR) has had low dissolved oxygen conditions intermittently during the late summer and early fall. The low dissolved oxygen conditions are impacting critical fish habitat and the SJR is being regulated under a state of California remediation plan that includes the development of a total maximum daily load (TMDL) allocation for oxygen demanding substances. In…	No
2-s2.0-42349097375	2008	Flexible biorefinery for producing fermentation sugars, lignin and pulp from corn stover	A new biorefining process is presented that embodies green processing and sustainable development. In the spirit of a true biorefinery, the objective is to convert agricultural residues and other biomass feedstocks into value-added products such as fuel ethanol, dissolving pulp, and lignin for resin production. The continuous biomass fractionation process yields a liquid stream rich in hemicellul…	No
2-s2.0-46649115914	2008	Dynamics of main nutrient input to Xiangxi Bay of the Three-Gorges Reservoir	Based on routine monitoring data in Xiangxi River and its main tributary Gaolan River from September 2000 to June 2005, this paper estimates the contribution of riverine nutrients, and analyzes the monthly dynamics of concentrations and fluxes of nutrients. The results show that Xiangxi Bay annually receives 1623.49 tons of total nitrogen (TN) and 331.85 tons of total phosphorus; Xiangxi River al…	No
2-s2.0-45749095498	2008	A laboratory study of the zonal structure of western boundary currents	The zonal structure of strongly nonlinear inertial western boundary currents (WBCs) is studied experimentally along a straight \meridional\" coast in a 5-m-diameter rotating basin by analyzing the \"zonal\" profile of the meridional velocity field as a function of transport intensity and other dynamical parameters. The return flow that is generated by the surface wind stress curl in the oceanic i…	No
2-s2.0-45149102932	2008	A protocol for constructing gene targeting vectors: Generating knockout mice for the cadherin family and beyond	We describe here a streamlined procedure for targeting vector construction, which often is a limiting factor for gene targeting (knockout) technology. This procedure combines various highly efficient recombination-based cloning methods in bacteria, consisting of three steps. First step is the use of Red-pathway-mediated recombination (recombineering) to capture a genomic fragment into a Gateway-c…	No
2-s2.0-41149109452	2008	Microbial BOD sensor for monitoring treatment of wastewater from a rubber latex industry	A cell-based biosensor system was designed for monitoring an anaerobic process for treatment of high biochemical oxygen demand (BOD) levels in wastewater samples from a factory processing concentrated rubber latex. The BOD biosensor used immobilized mixed culture of microorganisms as the biological sensing element and an oxygen electrode as the transducer. The assay principle is based on the dete…	No
2-s2.0-44349110075	2008	Which spatial discretization for distributed hydrological models? Proposition of a methodology and illustration for medium to large-scale catchments	Distributed hydrological models are valuable tools to derive distributed estimation of water balance components or to study the impact of land-use or climate change on water resources and water quality. In these models, the choice of an appropriate spatial discretization is a crucial issue. It is obviously linked to the available data, their spatial resolution and the dominant hydrological proces…	No
2-s2.0-44949141363	2008	Emergence of cold water strawberry disease of rainbow trout Oncorynchus mykiss in England and Wales: Outbreak investigations and transmission studies	Cold water strawberry disease (CWSD), or red mark syndrome (RMS), is a severe dermatitis affecting the rainbow trout Oncorynchus mykiss. The condition, which presents as multifocal, raised lesions on the flanks of affected fish, was first diagnosed in Scotland in 2003 and has since spread to England and Wales. Results of field investigations indicated the condition had an infectious aetiology, wi…	No
2-s2.0-43049120021	2008	Monodisperse, hypercrosslinked polymer microspheres as tailor-made sorbents for highly efficient solid-phase extractions of polar pollutants from water samples	In this detailed analytical study, we have evaluated in-house synthesised polymeric solid-phase extraction (SPE) sorbents in the form of monodisperse, hypercrosslinked polymer microspheres with diameters in the low micrometre range (âˆ¼4 Î¼m). More specifically, their performance in the on-line SPE of a group of polar pollutants has been investigated thoroughly. The novel hypercrosslinked materia…	No
2-s2.0-41649117595	2008	Pseudomonas japonica sp. nov., a novel species that assimilates straight chain alkylphenols	A bacterial strain, WLT which was isolated activated sludge, was able to degrade alkylphenols. 16S rDNA sequence analysis indicated that strain WLT belonged to the genus Pseudomonas (sensu stricto) and formed a monophyletic clade with the type strain of Pseudomonas graminis and other members in the Pseudomonas putida subcluster with sequence similarity values higher than 97%. Genomic relatedness …	No	not detected in aquatic environment, but in WWTP
2-s2.0-43949102728	2008	Urban particle capture in bioretention media. I: Laboratory and field studies	Bioretention is a novel stormwater best-management practice that uses a mixture of soil/sand/mulch as adsorptive filtration media that can capture both urban particulates and dissolved pollutants while promoting infiltration. This study conducted a series of laboratory column experiments and field observations, which showed that: (1) bioretention media stratification occurs with runoff percolatio…	No
2-s2.0-43949101343	2008	Analysis of the methodology to determine anaerobic toxicity: Evaluation of main compounds present in wastewater treatment plants (WWTPs)	The influence of the concentration of biomass on the level of inhibition and anaerobic degradation kinetics in batch systems was studied with toxic compounds that can generate destabilization in the operation of sludge anaerobic digesters. The compounds were grouped in four families; long chain fatty acids, polycyclic aromatic hydrocarbons, linear alkylbenzene sulphonates and organic acids. For t…	No
2-s2.0-44149121703	2008	The first introduction of reclaimed wastewater to dry-farming field in Okinawa Island, Japan	Reclaimed wastewater (RWW) will be introduced to the first large-scale irrigation project for dry-farming on Okinawa island, Japan. The wastewater reclamation for agricultural use sounds attractive to the water resource management. Since there are no specific standards for the RWW irrigation, the monitoring and other demonstrative experiments have been conducted using the experimental reclamation…	No
2-s2.0-43549095268	2008	Field calibrations of a long-term UV dosimeter for aquatic UVB exposures	Various methodologies using a wide range of measurement systems have been employed previously in order to determine the amount of UV that could be incident upon various aquatic organisms in a number of different aquatic locales. Broadband meters and spectroradiometers have been employed extensively to take underwater measurements. However, these measurement campaigns are limited by the fact that …	No
2-s2.0-56349157924	2008	Geoenvironmental testing	Geoenvironmental concerns involve unsaturated soils in problems like soil contamination, waste disposal and ground-atmosphere interactions. This paper deals with the two first points. To tackle geoenvironmental problems in unsaturated soils, it is necessary to identify experimentally the retention and transfer phenomena that govern the movements of fluids and chemical species in the unsaturated s…	No
2-s2.0-43049144914	2008	Responses of chronically contaminated biofilms to short pulses of diuron. An experimental study simulating flooding events in a small river	An experimental study was undertaken to highlight the potential ecotoxicological impact of the herbicide diuron on biofilms during flooding events in a small river (Morcille) in the Beaujolais vineyard area (France). We investigated the responses of chronically contaminated biofilms exposed to short-term pulses (3 h) of diuron. Biofilms were grown in indoor microcosms that were either non-contami…	No
2-s2.0-52649138858	2008	Fungal diversity during leaf decomposition in a stream assessed through clone libraries	Maple, linden and oak leaf disks were exposed for 17 days in a first order, softwater stream in Nova Scotia, Canada. After aerating disks in water for 2 days, we recovered conidia of aquatic hyphomycetes belonging to 7 (oak) or 13 (maple, linden) species. We also extracted DNA from stream-exposed disks and amplified partial SSU rDNA sequences. The diversity of these sequences was evaluated by con…	No
2-s2.0-43549092586	2008	Viruses in freshwater ecosystems: An introduction to the exploration of viruses in new aquatic habitats	1. Viruses have become widely recognized as the most abundant biological entities and important players in aquatic environments, and this realization has profoundly changed our conceptual understanding of the functioning and regulation of aquatic ecosystems in the last two decades. However, most of this research has focussed on marine viruses, especially in pelagic environments. 2. Here we introd…	No
2-s2.0-44649131403	2008	Experience in Wales (UK) of the optimisation of orthophosphate dosing for controlling lead in drinking water	Dwr Cymru Welsh Water supplies over three million people with drinking water throughout most of Wales (UK). Ortho-phosphate has increasingly been dosed at around 1 mg/L (P) to further reduce the corrosivity of supplies to the lead pipes which connect approximately 30% of houses to water mains in the company's area, additional to long-establish pH adjustment measures. The installation of new ortho…	No
2-s2.0-44949262815	2008	Understanding the influence of suspended solids on water quality and aquatic biota	Over the last 50 years the effects of suspended solids (SS) on fish and aquatic life have been studied intensively throughout the world. It is now accepted that SS are an extremely important cause of water quality deterioration leading to aesthetic issues, higher costs of water treatment, a decline in the fisheries resource, and serious ecological degradation of aquatic environments. As such, gov…	No
2-s2.0-43049160868	2008	A framework for valuing the health benefits of improved bathing water quality in the River Irvine catchment	A simple model predicting bathing water concentrations of Escherichia coli from livestock in the Irvine catchment in SW Scotland has been adapted for intestinal enterococci (IE). This has been used to predict risk of bather illness by extrapolation of published data on bather IE exposure vs incidence of gastro-enteritis. Simulated reduction in the risk of illness by reduced faecal loading was mul…	No
2-s2.0-43449105579	2008	Dominant sugar utilizers in sediment of Lake Constance depend on syntrophic cooperation with methanogenic partner organisms	Six strains of novel bacteria were isolated from profundal sediment of Lake Constance, a deep freshwater lake in Germany, by direct dilution of the sediment in mineral agar medium containing a background lawn of the hydrogen-scavenging Methanospirillum hungatei as a syntrophic partner. The numbers of colony-forming units obtained after incubation for more than 2 months were in the same range as t…	No
2-s2.0-45749135528	2008	Morphological and genetic evidence that the cyanobacterium Lyngbya wollei (Farlow ex Gomont) speziale and dyck encompasses at least two species	Dense blooms of the cyanobacterium Lyngbya wollei are increasingly responsible for declining water quality and habitat degradation in numerous springs, rivers, and reservoirs. This research represents the first molecular phylogenetic analysis of L. wollei in comparison with the traditional morphological characterization of this species. Specimens were collected from several springs in Florida and…	No
2-s2.0-43949126167	2008	High-resolution monitoring of biogeochemical gradients in a tar oil-contaminated aquifer	The detailed understanding of in situ biodegradation of petroleum hydrocarbons in porous aquifers requires knowledge on biogeochemical gradients, the distribution of individual redox species and microorganisms. The generally limited spatial resolution of conventional monitoring wells, however, hampers appropriate characterization of small-scale gradients and thus localization of the relevant proc…	No
2-s2.0-44649175629	2008	Decline and extirpation of an endangered Panamanian stream frog population (Craugastor punctariolus) due to an outbreak of chytridiomycosis	We conducted a mark-recapture study of three subpopulations of Craugastor punctariolus at a mid-elevation site in central Panama between 1999 and 2005. The study spans a period over which the pathogenic fungus Batrachochytrium dendrobatidis (Bd) was absent from the site, invaded the site and decimated all amphibian populations, and now persists. We quantified natural demographic parameters prior …	No
2-s2.0-51449099018	2008	Effects of single and multiple applications of mosquito insecticides on nontarget arthropods	Mosquito management plans have been implemented in the United States and globally to manage mosquito vectors of West Nile virus and many other diseases. However, there is public concern about ecological risks from using insecticides to manage mosquitoes. Two studies were conducted during the late summers of 2004 through 2006 at Benton Lake National Wildlife Refuge near Great Falls, MT. The first …	No
2-s2.0-43949109565	2008	Macroinvertebrate indicators of lake acidification: Analysis of monitoring data from UK, Norway and Sweden	Although the acid sensitivity of many invertebrate species in lakes is well known, methods for assessment of lake acidification based on macroinvertebrate samples are less developed than for rivers. This article analyses a number of existing metrics developed for assessment of river acidification, and evaluates their performance for assessment of lake acidification. Moreover, new species-based in…	No
2-s2.0-45749116874	2008	Electro-organic synthesis and characterization of new dihydroxybenzene dinitrile derivatives with fluorescent properties	Novel fluorescent molecules were synthesized by designing an environmentally friendly method involving the bulk electrolysis technique. This electrochemical treatment process helps protect the environment by minimizing the toxic waste component of effluent. The electrochemical oxidation of 3,6-dihydroxybenzene-1,2-dinitrile (DBD) in the presence of benzenesulfinic acids was studied in an aqueous …	No
2-s2.0-44149100223	2008	In vitro biotransformation of surfactants in fish. Part I: Linear alkylbenzene sulfonate (C12-LAS) and alcohol ethoxylate (C13EO8)	Developing regulatory activities (e.g., REACh, [DGEE. 2003. Directorates General Enterprise and Environment. The new EU chemicals legislation REACH. DG Enterprise, Brussels, Belgium. (http://www.europa.eu.int/comm/enterprise/reach/index_en.htm)]) will require bioaccumulation to be assessed for thousands of chemicals. Further, there is increasing pressure to reduce, refine or replace animal tests.…	No
2-s2.0-40949121892	2008	Metallothioneins and cytosolic metals in Neomysis integer exposed to cadmium at different salinities	In the present study the induction of metallothioneins (MTs) and its relation to cytosolic metal concentrations (Zn, Cu and Cd) in the euryhaline crustacean Neomysis integer exposed to Cd at different salinities was studied. N. integer was exposed to the same free cadmium ion activity of 5.74 Ã— 10-9 mol l-1 (i.e. 1/5 of the 96 h LC50 value expressed as cadmium activity) in hypo-osmotic (5 psu), …	No
2-s2.0-69249110476	2008	Assessing the US watershed management movement: National trends and an Illinois case study	Local watershed planning is an increasingly important component of environmental management. This article provides an overview of local watershed management efforts occurring across the US and then focuses on one case study from southern Illinois. First, analysis of 1145 local watershed groups shows that government agencies, farmers, and rural residents are key stakeholders in local groups that p…	No
2-s2.0-44649191170	2008	Color variation among habitat types in the spiny softshell turtles (Trionychidae: Apalone) of Cuatrociénegas, Coahuila, Mexico	Ground coloration is highly variable in many reptile species. In turtles, ground color may correspond well to the background coloration of the environment and can change over time to match new surroundings in the laboratory. Variable carapace and plastron coloration across three habitat types were investigated in the Black Softshell Turtle, Apalone spinifera atra, by measuring individual componen…	No
2-s2.0-45249089026	2008	Assessing the stability of mercury and methylmercury in a varved lake sediment deposit	Using lake sediments to infer past total mercury and methylmercury loading to the environment requires that diagenetic processes within the sediment do not significantly affect the concentrations or net accumulation rates of the mercury species. Because carbon is lost during early sediment diagenesis, the close link between carbon and mercury raises the question of how reliable lake sediments are…	No
2-s2.0-45449103842	2008	Assessing soil quality data by positive matrix factorization	Multivariate data analysis techniques such as factor analysis are useful tools in soil quality assessment. In this study, the applicability of a new factor analysis model, positive matrix factorization (PMF), which produces strict non-negative factor loadings and scores, was evaluated. The dataset used was obtained from soil samples taken from a long-term reclaimed wastewater-irrigated cropland a…	No
2-s2.0-42649093194	2008	Rational expectations, psychology and inductive learning via moving thresholds	This paper modifies a previously introduced class of heterogeneous agent models in a way that allows for the inclusion of different types of agent motivations and behaviours in a consistent manner. The agents operate within a highly simplified environment where they are only able to be long or short one unit of the asset. The price of the asset is influenced by both an external information stream…	No
2-s2.0-43449132081	2008	Assessing the controls of the snow energy balance and water available for runoff in a rain-on-snow environment	Rain-on-snow (ROS) melt production and its contribution to water available for runoff is poorly understood. In the Pacific Northwest (PNW) of the USA, ROS drives many runoff events with turbulent energy exchanges dominating the snow energy balance (EB). While previous experimental work in the PNW (most notably the H.J. Andrews Experimental Forest (HJA)) has quantified these energy balance compone…	No
2-s2.0-45549100539	2008	Upgrading of wastewater treatment plants for nutrient removal under optimal use of existing structures	Upgrading of wastewater treatment plants under maximum use of existing structures is often an important requirement, but also useful due to a number of aspects. Because of a change in legal effluent requirements, a number of plants in Austria, typically aged 20+ years, were required to be extended. The two stage activated sludge HYBRIDÂ®-process often provides an interesting design alternative fo…	No
2-s2.0-45549088145	2008	Reducing health risks from wastewater use in urban and peri-urban sub-Saharan Africa: Applying the 2006 WHO guidelines	Where rapid urbanization is outpacing urban capacities to provide sound sanitation and wastewater treatment, most water sources in city vicinity are heavily polluted. This is of great concern as many of the leafy vegetables eaten raw in the cities are produced in these areas. Following the new WHO guidelines, different non-treatment options at farm, market, and kitchen level were field tested for…	No
2-s2.0-46749153121	2008	What was the groundwater quality before mining in a mineralized region? Lessons from the Questa Project	The U.S. Geological Survey, in cooperation with the New Mexico Environment Department and supported by Molycorp, Inc (currently Chevron Minerals), has completed a 5-year investigation (2001-2006) to determine the pre-mining ground-water quality at Molycorp's Questa molybdenum mine in northern New Mexico. Current mine-site ground waters are often contaminated with mine-waste leachates and no data …	No
2-s2.0-45749102897	2008	Interfacial instabilities in a microfluidic Hele-Shaw cell	This paper describes surfactant-sensitive, dynamic instabilities that occur to aqueous droplets translating in a continuous flow of hexadecane in a microfluidic Hele-Shaw cell (HSC). A very low interfacial tension (on the order of 0.01 mN m-1) between water and hexadecane allowed for deformation of the droplets along the fields of flow and tip-streaming from moving droplets. In the system of wate…	No
2-s2.0-45849097570	2008	Uranium in the groundwater of permo-triassic aquifers of the Visok region, Stara Planina, Eastern Serbia	An elevated concentration of uranium in the water of some springs in the Permo-Triassic sedimentary rocks of the Visok region, south-eastern slopes of the Stara Planina, eastern Serbia, is interpreted based on geological, hydrogeological and hydrochemical data. Uranium concentration in groundwater was first examined whilst exploring for uranium minerals as an energy resource. The purpose of a lat…	No
2-s2.0-44649179996	2008	Temporal changes in the distribution, methylation, and bioaccumulation of newly deposited mercury in an aquatic ecosystem	Our objective was to examine how the behavior of atmospheric mercury (Hg) deposited to boreal lake mesocosms changed over time. We added inorganic Hg enriched in a different stable isotope in each of two years, which allowed us to differentiate between Hg added in the first and second year. Although inorganic Hg and methylmercury (MeHg) continued to accumulate in sediments throughout the experime…	No
2-s2.0-45049083152	2008	Understanding groundwater chemistry using mixing models	For the last 15 a, SKB (the Swedish Nuclear Fuel and Waste Management Company) has been using the Ã„spÃ¶ Hard Rock Laboratory (HRL) as the main test site for the development of suitable tools and methods for the final disposal of spent nuclear fuel. Major achievements have been made in the development of a new groundwater modelling technique. The technique described in this paper is used within t…	No
2-s2.0-47049106659	2008	Alphaviruses: An emerging cause of arthritis?	The most important alphaviruses causing joint inflammation, the clinical picture of the diseases and their epidemiological features are described. Arthritis caused by alphaviruses is certainly increasing and it should be kept in mind as a possibility especially in those cases where the disease starts with flulike symptoms, and rash is involved. Â© 2008 Wolters Kluwer Health | Lippincott Williams …	No
2-s2.0-44149103871	2008	SGLT-1-mediated glucose uptake protects human intestinal epithelial cells against Giardia duodenalis-induced apoptosis	Infection with Giardia duodenalis is one of the most common causes of waterborne diarrheal disease worldwide. Mechanisms of pathogenesis and host response in giardiasis remain incompletely understood. Previous studies have shown that exposure to G. duodenalis products induce apoptosis in enterocytes. We recently discovered that sodium-dependent glucose cotransporter (SGLT)-1-mediated glucose upta…	No
2-s2.0-52449132277	2008	Halorubrum luteum sp. nov., isolated from Lake Chagannor, Inner Mongolia, China	A novel halophilic archaeon, strain CGSA15T, was isolated from water of Lake Chagannor in China. The strain grew optimally at 33-37 Â°C, pH 9.5-10.0 and 4.0-4.3 M NaCl. The major polar lipids were phosphatidylglycerol and phosphatidylglycerol phosphate methyl ester. The genomic DNA G+C content of strain CGSA15T was 60.2 mol%. Phylogenetic analysis based on 16S rRNA gene sequences revealed that st…	Yes, a novel species of the genus Halorubrum, for which the name Halorubrum luteum sp. nov. is proposed. T
2-s2.0-46149095264	2008	Toxicity assessment of collected fractions from an extracted naphthenic acid mixture	Recent expansion within the oil sands industry of the Athabasca Basin of Alberta, Canada has led to increased concern regarding process-affected wastewaters produced during bitumen extraction. Naphthenic acids (NAs) have been identified as the primary toxic constituents of oil sands process-affected waters (OSPW) and studies have shown that with time, microbial degradation of lower molecular weig…	No
2-s2.0-46349089541	2008	Human settlement ecology and chimpanzee habitat selection in Mali	Customary land-use practices create distinctive cultural landscapes, including landscapes where abandoned settlements host vegetation that attracts wild animals. Understanding how landscape patterns relate to land-use history can help clarify the ecological effects of particular land uses. This study examines relationships between chimpanzee habitat selection and Maninka settlement practice, to d…	No
2-s2.0-43149083937	2008	Gas-liquid flow around an obstacle in a vertical pipe	This paper presents a novel technique to study the two-phase flow field around an asymmetric obstruction in a vertical pipe with a nominal diameter of DN200. Main feature of the experiments is the shifting of a half-moon shaped diaphragm causing the obstruction along the axis of the pipe. In this way, the 3D void field is scanned with a stationary wire-mesh sensor that supplies data with a spatia…	No
2-s2.0-49049098679	2008	Rainbow beads: A color coding method to facilitate high-throughput screening and optimization of one-bead one-compound combinatorial libraries	We have developed a new color-encoding method that facilitates high-throughput screening of one-bead one-compound (OBOC) combinatorial libraries. Polymer beads displaying chemical compounds or families of compounds are stained with oil-based organic dyes that are used as coding tags. The color dyes do not affect cell binding to the compounds displayed on the surface of the beads. We have applied …	No
2-s2.0-44649120306	2008	The Social-Emotional Processing Stream: Five Core Constructs and Their Translational Potential for Schizophrenia and Beyond	Background: Cognitive neuroscience approaches to translational research have made great strides toward understanding basic mechanisms of dysfunction and their relation to cognitive deficits, such as thought disorder in schizophrenia. The recent emergence of Social Cognitive and Affective Neuroscience has paved the way for similar progress to be made in explaining the mechanisms underlying the soc…	No
2-s2.0-44949157746	2008	Structure and mechanical properties of selected biological materials	Mineralized biological tissues offer insight into how nature has evolved these components to optimize multifunctional purposes. These mineral constituents are weak by themselves, but interact with the organic matrix to produce materials with unexpected mechanical properties. The hierarchical structure of these materials is at the crux of this enhancement. Microstructural features such as organize…	No
2-s2.0-48449093167	2008	Modeling soil water uptake by plants using nonlinear dynamic root density distribution function	Water uptake by plants is one of the major components of water balance of the vadose zone that greatly influences the contaminant and moisture movement in variably saturated soils. In this study, a nonlinear macroscopic root water uptake model that includes the impact of soil moisture stress is developed. The model incorporates the spatial and temporal variation of root density in addition to the…	No
2-s2.0-47249139526	2008	Calibrating access-tube time domain reflectometry soil water measurements in deep heterogeneous soils	Hydrologic characterization of the vadose zone requires accurate measurements of soil water in a variety of soil textures. Time domain reflectometry (TDR) instruments are commonly used to obtain soil moisture. Although there are advantages to using TDR, certain types of instruments pose challenges, including proper installation and calibration, which must be overcome. The principal objective of t…	No
2-s2.0-64749093365	2008	Seed dispersal and ingestion of insect-infested seeds by black howler monkeys in flooded forests of the parana river, Argentina	All howler monkey species (Alouatta spp.) have a folivorous-frugivorous diet. Howler monkeys are reported to be seed dispersers in several areas, including black howlers (Alouatta caraya), which are important seed dispersers in northern Argentinean forests. The goal of this work was to study the three-way interaction between insects, seeds, and black howlers, and assess the functional significanc…	No
2-s2.0-40949098725	2008	Minimal Aspect Distortion (MAD) mosaicing of long scenes	Long scenes can be imaged by mosaicing multiple images from cameras scanning the scene. We address the case of a video camera scanning a scene while moving in a long path, e.g. scanning a city street from a driving car, or scanning a terrain from a low flying aircraft. A robust approach to this task is presented, which is applied successfully to sequences having thousands of frames even when usin…	No
2-s2.0-48749116815	2008	Winter-to-spring transition in east Asia: A planetary-scale perspective of the south China spring rain onset	Analysis of observations from 1979 to 2002 shows that the seasonal transition from winter to spring in East Asia is marked with a distinctive event - the onset of the south China spring rain (SCSR). In late February, the reduced thermal contrast between ocean and land leads to weakening of the Asian winter monsoon as well as the Siberian high and the Aleutian low. Meanwhile, convection over Austr…	No
2-s2.0-84884861763	2008	The disruption of the Magellanic Stream	We present evidence that the accretion of warm gas onto the Galaxy today is at least as important as cold gas accretion. For more than a decade, the source of the bright Ha emission (up to 750 mRâ€ ) along the Magellanic Stream has remained a mystery. We present a hydrodynamical model that explains the known properties of the Ha emission and provides new insights on the lifetime of the Stream clo…	No
2-s2.0-51349153495	2008	Lateral shifts in near-field thermal radiation with surface phonon polaritons	It is well known that radiative heat transfer in the near field regime can be greatly enhanced because of photon tunneling, during which the classical radiation theory fails to predict the energy propagation direction. In the present article, we investigate the lateral shifts of energy pathways in near-field thermal radiation between two SiC plates separated by a vacuum gap. The energy streamline…	No
2-s2.0-46049099786	2008	Estrogenic endocrine disruption in Switzerland: Assessment of fish exposure and effects	Estrogenic exposure has been reported to occur in Swiss rivers, and there is concern that reduced reproductive health, caused by disturbances of the endocrine system, may contribute to the observed decline in brown trout catch. Consequently, we aimed to determine if disturbances of the endocrine system do occur in wild brown trout (Salmo trutta) in Switzerland and, in the affirmative case, if the…	No
2-s2.0-49649115535	2008	Recombinant infectious hematopoietic necrosis viruses induce protection for rainbow trout Oncorhynchus mykiss	Infectious hematopoietic necrosis virus (IHNV) and viral hemorrhagic septicaemia virus (VHSV) are rhabdoviruses that infect salmonids, producing serious economic losses. Two recombinant IHN viruses were generated by reverse genetics. For one (rIHNV GFP) the IHNV NV gene was replaced with the green fluorescent protein (GFP) gene. In the other (rIHNV-Gvhsv GFP) the G gene was also exchanged for tha…	No
2-s2.0-46449125231	2008	Bacterial biosensors for rapid and effective monitoring of biodegradation of organic pollutants in wastewater effluents	Significant amounts of toxic substances which are hazardous to animals, plants, microorganisms, and other living organisms including humans are released annually into aquatic and terrestrial environments, mostly from improper wastewater discharges. Early detection of such pollutants in wastewater effluents and proper monitoring before their final release into the environment is therefore necessar…	No
2-s2.0-44749088788	2008	Landscape-scale disturbance and boreal forest birds: Can large single-pass harvest approximate fires?	Boreal forest birds have adapted to changes caused by natural disturbances such as fire and this adaptation forms the basis for the Natural Disturbance Paradigm (NDP) underlying recent proposed changes in forest harvesting practices in western Canada. To date, this paradigm has been evaluated primarily at the stand level and within conventional harvesting systems. The potential for improvements i…	No
2-s2.0-49049118296	2008	Determination of basic antidepressants and their N-desmethyl metabolites in raw sewage and wastewater using solid-phase extraction and liquid chromatography-tandem mass spectrometry	A novel analytical method has been developed for the determination of six basic antidepressants (venlafaxine, sertraline, paroxetine, citalopram, amitriptyline, and fluoxetine) and four of their metabolites (O-desmethylvenlafaxine, desmethylsertraline, nortriptyline, and norfluoxetine) in raw sewage and roughly primary-treated wastewater. For analytical development purposes, two ion exchange soli…	No
2-s2.0-47949112809	2008	Characterisation and optimisation of individual wastewater treatment systems	Onsite individual wastewater treatment systems can provide a financially attractive alternative to a sewer connection in locations far from the existing sewer network. These systems are, however, relatively new, and practical experiences, especially long-term field studies, are lacking. Therefore, a thorough study of two compact biofilm-based, aerobic onsite systems, both of five population equiv…	No
2-s2.0-52049103606	2008	Tritium recapture behavior at a nuclear power reactor due to airborne releases	This paper describes the initiatives taken by Cook Nuclear Plant to study the on-site behavior of recaptured tritium released in its airborne effluents. Recapture is the process where a released radioactive effluent, in this case tritium, is brought back on-site through some mechanism. Precipitation, shifts in wind direction, or anthropogenic structures that restrict or alter effluent movement ca…	No
2-s2.0-50449089234	2008	Biological hydrolysis and acidification of sludge under anaerobic conditions: The effect of sludge type and origin on the production and composition of volatile fatty acids	New wastewater treatment processes resulting in considerably reduced sludge production and more effective treatment are needed. This is due to the more stringent legislations controlling discharges of wastewater treatment plants (WWTPs) and existing problems such as high sludge production. In this study, the feasibility of implementing biological hydrolysis and acidification process on different …	No
2-s2.0-54949120256	2008	Pollutants in drainage channels following long-term application of Mancozeb to banana plantations in southeastern Mexico	The aim of this study was to investigate how long-term Mancozeb application to banana plantations affects the occurrence of pollutants in drainage-channel sediment and water under tropical conditions. We estimated the possible accumulation of Mancozeb's principal metabolite ethylenethiourea (ETU), as well as manganese (Mn) and zinc (Zn) as components in channel sediment and water. We took samples…	No
2-s2.0-50449108679	2008	Total nitrogen removal in a hybrid, membrane-aerated activated sludge process	The hybrid (suspended and attached growth) membrane biofilm process (HMBP) is a novel method to achieve total nitrogen removal from wastewater. Air-filled hollow-fiber membranes are incorporated into an activated sludge tank, and a nitrifying biofilm develops on the membranes, producing nitrite and nitrate. By suppressing bulk aeration, the bulk liquid becomes anoxic, and the nitrate/nitrite can …	No
2-s2.0-48749104896	2008	Environmentally friendly slow release formulations of alachlor based on clay-phosphatidylcholine	A new clay-liposome complex was developed for reducing leaching of herbicides and contamination of groundwater. The liposomes were composed of the neutral and Environmental Protection Agency approved phospholipid phosphatidylcholine (PC). Adsorption of PC liposomes on the clay mineral montmorillonite could exceed the cation exchange capacity of the clay, and was well simulated by the Langmuir equ…	No
2-s2.0-48649110220	2008	Metal releases from a municipal solid waste incineration air pollution control residue mixed with compost	The influence of 10 wt.% mature compost was tested on the heavy metal leachate emissions from a calcium-rich municipal solid waste incineration air pollution control residue (MSWI APC). Apart from elongated columns (500 and 1250 mm), an otherwise norm compliant European percolation test setup was used. More than 99% of the metals Al, As, Cd, Cr, Cu, Fe and Ni were left in the APC residue after le…	No
2-s2.0-48549084687	2008	Potential for total nitrogen removal by combining vertical flow and horizontal flow constructed wetlands: A full-scale experiment study	To improve total nitrogen removal, a full-scale experimental study was conducted on a hybrid constructed wetlands plant designed for 100 person equivalents. The plant was composed of a first stage of vertical filters (fed with raw wastewater), followed by a second stage of horizontal filters. It was monitored over one year, measuring hydraulic conditions, physico-chemical conditions, gas emission…	No
2-s2.0-49749117151	2008	Electro-fenton degradation of rhodamine B based on a composite cathode of Cu<inf>2</inf>O nanocubes and carbon nanotubes	In this study, rhodamine B (RhB) in aqueous solution was effectively degraded by an electro-Fenton (E-Fenton) system with a novel oxygen-fed gas diffusion electrode. This electrode was prepared by combining Cu2O nanocubes and multiwall carbon nanotubes with poly tetrafluoroethylene (Cu 2O/CNTS/PTFE). The resulting Cu2O nanocubes and Cu 2O/CNTS/PTFE composite cathode were examined by X-ray diffrac…	No
2-s2.0-45249111130	2008	Can prey exhibit threat-sensitive generalization of predator recognition? Extending the Predator Recognition Continuum Hypothesis	Despite the importance of predator recognition in mediating predator-prey interactions, we know little about the specific characteristics that prey use to distinguish predators from non-predators. Recent experiments indicate that some prey who do not innately recognize specific predators as threats have the ability to display antipredator responses upon their first encounter with those predators …	No
2-s2.0-49649105737	2008	Inapparent infections and cholera dynamics	In many infectious diseases, an unknown fraction of infections produce symptoms mild enough to go unrecorded, a fact that can seriously compromise the interpretation of epidemiological records. This is true for cholera, a pandemic bacterial disease, where estimates of the ratio of asymptomatic to symptomatic infections have ranged from 3 to 100 (refs 1-5). In the absence of direct evidence, under…	No
2-s2.0-47049090786	2008	Chemical and isotopic (?<sup>18</sup>O‰, ?<sup>2</sup>H‰, ?<sup>13</sup>C‰,<sup>222</sup>Rn) multi-tracing for groundwater conceptual model of carbonate aquifer (Gran Sasso INFN underground laboratory - central Italy)	A hydrochemical and isotope study was conducted on the drainage waters of an underground laboratory, located inside the Gran Sasso massif (central Italy). The study was expected to improve the conceptual model of groundwater circulation at the base of an over 1000-thick unsaturated zone in the Gran Sasso partitioned karst aquifer. This lithostratigraphically and tectonically complex aquifer is ty…	No
2-s2.0-49749094039	2008	Pesticides in the atmosphere across Canadian agricultural regions	The Canadian Atmospheric Network for Currently Used Pesticides (CANCUP) was the first comprehensive, nationwide air surveillance study of pesticides in Canada. This paper presents the atmospheric occurrence and distribution of pesticides including organochlorine pesticides (OCPs), organophosphate pesticides (OPPs), acid herbicides (AHs), and neutral herbicides (NHs) during the spring to summer of…	No
2-s2.0-48749093440	2008	Late Quaternary palaeosols in the Yangtze Delta, China, and their palaeoenvironmental implications	The stiff clays beneath Holocene strata in the Yangtze Delta are interpreted as palaeosols, based on pedogenic features including illuvial argillans, voids, cracks, iron-manganese concretions and nodules, and carbonate materials. Variations in clay content with depth, the occurrence of foraminifera, and the environmental magnetism characteristics of the palaeosols suggest that their parent materi…	No
2-s2.0-49149086372	2008	Genesis of soils across a late Quaternary volcanic landscape in the humid tropical island of Leyte, Philippines	This study evaluated the characteristics and genesis of soils across a young volcanic landscape in the humid tropical island of Leyte, Philippines. Five representative soil pedons (P1-P5) derived from late Quaternary volcanoclastics (i.e. fragmental) on a hillslope sequence were examined and sampled. Results revealed that the soils have generally similar morphological characteristics particularly…	No
2-s2.0-50449102797	2008	Highly sensitive multiresponsive chemosensor for selective detection of Hg<sup>2+</sup>in natural water and different monitoring environments	A new chemosensor RF1 that combines a ferrocene unit and a rhodamine block via the linkage of a carbohydrazone binding unit was designed and prepared for the highly selective detection of Hg2+ in natural water. This chemosensor displays great brightness and fluorescence enhancement following Hg2+ coordination within the limit of detection for Hg2+ at 1 parts per billion (ppb). The fluorescence in…	No
2-s2.0-52249093768	2008	Correlation between CD4 counts of HIV patients and enteric protozoan in different seasons - An experience of a tertiary care hospital in Varanasi (India)	Background: Protozoan infections are the most serious among all the superimposed infections in HIV patients and claim a number of lives every year. The line of treatment being different for diverse parasites necessitates a definitive diagnosis of the etiological agents to avoid empirical treatment. Thus, the present study has been aimed to elucidate the associations between diarrhoea and CD4 coun…	No
2-s2.0-47949094872	2008	Simultaneous determination of pharmaceuticals, endocrine disrupting compounds and hormone in soils by gas chromatography-mass spectrometry	Analytical methods have been developed for simultaneous determination of six different pharmaceuticals and personal care products (PPCPs) (clofibric acid, ibuprofen, naproxen, ketoprofen, diclofenac, and triclosan), three endocrine disrupting compounds (EDCs) (4-tert-octylphenol, 4-n-nonylphenol, and bisphenol A (BPA)) and one estrogenic compound (estrone) in soil matrix. The soils were extracted…	No
2-s2.0-49149106637	2008	Preservation of primary stable isotope signals in dinosaur remains, and environmental gradients of the Late Cretaceous of Montana and Alberta	Although the use of stable isotope data from vertebrate remains is becoming common for the Cenozoic, their application to Mesozoic environments has been rare, in part due to the perception that diagenesis has obfuscated all potential primary signal. In this paper, we illustrate how stable isotope data collected from dinosaur and other vertebrate remains can in fact be used to reconstruct paleoenv…	No
2-s2.0-48649092025	2008	A national reconnaissance for pharmaceuticals and other organic wastewater contaminants in the United States - II) Untreated drinking water sources	Numerous studies have shown that a variety of manufactured and natural organic compounds such as pharmaceuticals, steroids, surfactants, flame retardants, fragrances, plasticizers and other chemicals often associated with wastewaters have been detected in the vicinity of municipal wastewater discharges and livestock agricultural facilities. To provide new data and insights about the environmental…	No
2-s2.0-54149093163	2008	Treatment of the Hudson River for water supply development	United Water New York (UWNY) supplies drinking water from a variety of ground and surface water supplies to about 90% of the residences and businesses in Rockland County, NY. As a resuk of increasing growth in Rockland County, there is a need for development of new water supplies to meet increasing demands. After extensive evaluation, UWNY has determined that utilization of the Hudson River as a …	No
2-s2.0-57249083969	2008	Long-term leakage of DDT and other pesticides from a tree nursery landfill	A landfill consisting mainly of organic waste from a tree nursery and containing an estimated 900 kg of DDT (1,1-(2,2,2-trichloroethylidene)bis(4- chlorobenzene) has been monitored since 1994. Downstream ground water was sampled from four wells. More than 10 years of monitoring of two of the wells is presented in the report, in addition to sampling of the waste. A total of seven pesticides were d…	No
2-s2.0-51649126274	2008	Application of multivariate statistical techniques in the assessment of surface water quality in Uluabat Lake, Turkey	The application of different multivariate statistical approaches for the interpretation of a complex data matrix obtained during the period 2004-2005 from Uluabat Lake surface water is presented in this study. The dataset consists of the analytical results of a 1 year-survey conducted in 12 sampling stations in the Lake. Twelve parameters (T, pH, DO, PO43--P, NH4-N, NO2-N, NO3-N, SO43-, BOD, COD,…	No
2-s2.0-47249133843	2008	Volatile organic compound emissions from wastewater treatment plants in Taiwan: Legal regulations and costs of control	This study assessed volatile organic compound (VOC) emission characteristics from wastewater treatment plants (WWTPs) in five Taiwanese industrial districts engaged in numerous manufacturing processes, including petrochemical, science-based industry (primarily semiconductors, photo-electronics, electronic products and biological technology), as well as multiple manufacturing processes (primarily …	No
2-s2.0-49249126932	2008	Unravelling the microbial role in ooid formation - Results of an in situ experiment in modern freshwater Lake Geneva in Switzerland	The microbial role in the formation of the cortex of low-Mg calcite freshwater ooids in western part of Lake Geneva in Switzerland has been suggested previously, but not demonstrated conclusively. Early work mostly concentrated in hypersaline milieus, and hence little is known about their genesis in freshwater environments. We designed an in situ experiment to mimic the natural process of low-Mg …	No
2-s2.0-48549088611	2008	Type X Toxoplasma gondii in a wild mussel and terrestrial carnivores from coastal California: New linkages between terrestrial mammals, runoff and toxoplasmosis of sea otters	Sea otters in California are commonly infected with Toxoplasma gondii. A unique Type X strain is responsible for 72% of otter infections, but its prevalence in terrestrial animals and marine invertebrates inhabiting the same area was unknown. Between 2000 and 2005, 45 terrestrial carnivores (lions, bobcats, domestic cats and foxes) and 1396 invertebrates (mussels, clams and worms) were screened f…	No
2-s2.0-53749098341	2008	Cloacibacillus evryensis gen. nov., sp. nov., a novel asaccharolytic, mesophilic, amino-acid-degrading bacterium within the phylum 'Synergistetes', isolated from an anaerobic sludge digester	A novel anaerobic, mesophilic, amino-acid-utilizing bacterium, strain 158T, was isolated from an anaerobic digester of a wastewater treatment plant. Cells of strain 158T were non-motile, rod-shaped (2.0-3.0 Ã— 0.8-1.0 Î¼m) and stained Gram-negative. Optimal growth occurred at 37 Â°C and pH 7.0 in an anaerobic basal medium containing 1% Casamino acids. Strain 158T fermented arginine, histidine, ly…	Yes, strain 158T represents a novel species in a new genus, Cloacibacillus evryensis gen. nov., sp. nov., in the phylum 'Synergistetes'.
2-s2.0-50249113752	2008	Levels and trends of HBCD and BDEs in the European and Asian environments, with some information for other BFRs	In this paper, we review recent data for brominated flame retardants (particularly BDEs, HBCD and TBBP-A) in samples from the European and Asian environments, including recent temporal trend studies. Research is active and we cite over 100 studies published during 2005-2007. Environmental compartments studied comprise the atmosphere, indoor and outdoor air, sewage sludges, soils and sediments and…	No
2-s2.0-48649101056	2008	Monitoring of dioxin-like, estrogenic and anti-androgenic activities in sediments of the Bizerta lagoon (Tunisia) by means of in vitro cell-based bioassays: Contribution of low concentrations of polynuclear aromatic hydrocarbons (PAHs)	We used an array of in vitro cell-based bioassays to assess dioxin-like, estrogenic and (anti-)androgenic activities in organic extracts of sediments from the Bizerta lagoon, one of the largest Tunisian lagoons subjected to various anthropogenic and industrial pressures. The sediments were sampled both in winter and summer 2006 in 6 stations differently impacted and in one reference station locat…	No
2-s2.0-49749127949	2008	Intense transpositional activity of insertion sequences in an ancient obligate endosymbiont	The streamlined genomes of ancient obligate endosymbionts generally lack transposable elements, such as insertion sequences (IS). Yet, the genome of Wolbachia, one of the most abundant bacterial endosymbionts on Earth, is littered with IS. Such a paradox raises the question as to why there are so many ISs in the genome of this ancient endosymbiont. To address this question, we investigated IS tra…	No
2-s2.0-67650326646	2008	Subthreshold quantitative bronchoalveolar lavage: Clinical and therapeutic implications	Background:: Quantitative bronchoalveolar lavage (qBAL) is used for accurate diagnosis of ventilator-associated pneumonia (VAP). The current study aims at defining the incidence, outcomes and therapeutic implications of false-negative (FN) qBAL. Methods:: Ventilated trauma, surgery, and burn, patients suspected of VAP underwent bronchoscopic qBAL. VAP was defined as qBAL with >10 CFU/mL (threshol…	No
2-s2.0-50849116511	2008	Corrosion-induced release of Cu and Zn into rainwater from brass, bronze and their pure metals. A 2-year field study	A 2-year field study has been conducted in an urban environment to provide annual release rates of copper and zinc from brass (20 wt% Zn) and copper and tin from bronze (6 wt% Sn) compared to sheets of their pure alloy constituents, copper and zinc. Despite relatively low nominal bulk alloy content, substantially more zinc was released from brass compared to copper. Both metals were released at a…	No
2-s2.0-40649093302	2008	Relationship of fish and macroinvertebrate communities in the mid-Atlantic uplands: Implications for integrated assessments	Indices developed for stream bioassessment are typically based on either fish or macroinvertebrate assemblages. These indices consist of metrics which subsume attributes of various species into aggregate measures reflecting community-level ecological responses to disturbance. However, little is known about the relationship between fish and macroinvertebrate metrics, or about how ecological health…	No
2-s2.0-49249131813	2008	Simulation analysis of environmental risk accident and management of high-sulfur gas field development in complex terrain	Environmental risk of high sulfur gas field exploitation has become one of the hot spots of environmental management studies. Severe gas H2S blowout accidents in recent years have shown that poor understanding and estimates of the poisonous gas movement could lead to dangerous evacuation delays. It is important to evaluate the real concentration of H2S, especially in complex terrain. Traditional …	No
2-s2.0-48949118533	2008	Effects of bed materials on the performance of an anaerobic sequencing batch biofilm reactor treating domestic sewage	The objective of this study was to determine the best performance of an anaerobic sequencing batch biofilm reactor (AnSBBR) based on the use of four different bed materials as support for biomass immobilization. The bed materials utilized were polyurethane foam (PU), vegetal carbon (VC), synthetic pumice (SP), and recycled low-density polyethylene (PE). The AnSBBR, with a total volume of 7.2 L, w…	No
2-s2.0-43949109908	2008	A stress invariant based criterion to estimate fatigue damage under multiaxial loading	This paper summarises an attempt to propose a novel stress invariant based approach suitable for estimating fatigue damage in the presence of complex multiaxial fatigue loadings. In more detail, according to the devised method, fatigue damage is evaluated by studying the components of the deviator path projected along the axes of a convenient frame of reference, whose orientation univocally depen…	No
2-s2.0-53749086841	2008	Low-dose theophylline reduces symptoms of acute mountain sickness	Objective. Headache, nausea, and sleeplessness at altitude [acute mountain sickness (AMS)] are major health problems for several million mountain recreationists who ascend to high altitudes each year. We aimed to test the efficacy of low-dose, slow-release theophylline for the prevention of AMS in a placebo-controlled, double-blind, randomized trial. Methods. Twenty healthy male volunteers (mean …	No
2-s2.0-45049087161	2008	Spatial distribution of an arthropod community in a pear orchard (southern France). Identification of a hedge effect	This study analysed specific features of the spatial distribution of a global population of arthropods in an experimental orchard of pear trees, Pyrus communis (L.), in southern France. Insect fauna was sampled by regular beating of the 210 trees in the experimental orchard from spring to autumn in three consecutive years (2004-2006). This orchard, where no chemical treatments had been applied si…	No
2-s2.0-56249142737	2008	A methodology for the comparative evaluation of alternative bioseparation technologies	Advances in upstream technologies and growing commercial demand have led to cell culture processes of ever larger volumes and expressing at higher product titers. This has increased the burden on downstream processing. Concerns regarding the capacity limitations of packed-bed chromatography have led process engineers to begin investigating new bioseparation techniques that may be considered as \a…	No
2-s2.0-64549122853	2008	Tactile spatial working memory activates the dorsal extrastriate cortical pathway in congenitally blind individuals	In sighted individuals, both the visual and tactile version of the same spatial working memory task elicited neural responses in the dorsal \where\" cortical pathway (Ricciardi et al., 2006). Whether the neural response during the tactile working memory task is due to visually-based spatial imagery or rather reflects a more abstract, supramodal organization of the dorsal cortical pathway remains …	No
2-s2.0-53749090753	2008	Halorubrum kocurii sp. nov., an archaeon isolated from a saline lake	A Gram-negative, non-motile, neutrophilic, rod-shaped, extremely halophilic archaeon, designated strain BG-1T, was isolated from a salt lake, Lake Bagaejinnor, in Inner Mongolia, China. Strain BG-1T was able to grow at 25-55 Â°C, required at least 2.5 M NaCl for growth (with an optimum at 3.4 M NaCl) and grew at pH 6.0-9.0 (with an optimum at pH 7.5). Hypotonic treatment with less than 2.0 M NaCl…	Yes, the conclusion that BG-1T represents a novel species within this genus, for which the name Halorubrum kocurii sp. nov. is propose
2-s2.0-49249114282	2008	In vitro and in vivo anti-inflammatory effects of taheebo, a water extract from the inner bark of Tabebuia avellanedae	Aim of study: Tabebuia spp. (Bignoniaceae) are native to tropical rain forests throughout Central and South America and have long been used as a folk medicine to treat bacterial infection, blood coagulation, cancer and inflammatory diseases. In this study, we aimed to demonstrate the ethnopharmacological activity of Tabebuia avellanedae in various in vitro and in vivo inflammatory conditions. Mat…	No
2-s2.0-51849111050	2008	Antibacterial activity from Siamese crocodile (Crocodylus siamensis) serum	Antibacterial agents were purified from Siamese crocodile serum by anion exchange, gel filtration and reversed phase HPLC. Six antibacterial agents designed as Hp14, Hp15, Hp17, Hp31, Hp36 and Hp51 were purified and proved to carry activity against Salmonella typhi, Escherichia coli, Staphylococcus aureus, Staphylococcus epidermidis, Klebsiella pneumoniae, Pseudomonas aeruginosa and Vibrio chorel…	No
2-s2.0-49949096504	2008	Pyrolysis/gasification of biomass for synthetic fuel production using a hybrid gas-water stabilized plasma torch	An experimental plasma-chemical reactor equipped with a novel hybrid gas-water stabilized torch is available at IPP Prague for the innovative and environmentally friendly plasma treatment of waste streams with a view to their sustainable energetic and chemical valorization and to a reduction of the emission of greenhouse gases. Gasification/pyrolysis of biomass was experimentally studied using cr…	No
2-s2.0-49549109147	2008	Early diagenesis of bone and tooth apatite in fluvial and marine settings: Constraints from combined oxygen isotope, nitrogen and REE analysis	Fossil bones and teeth of Late Pleistocene terrestrial mammals from Rhine River gravels (RS) and the North Sea (NS), that have been exposed to chemically and isotopically distinct diagenetic fluids (fresh water versus seawater), were investigated to study the effects of early diagenesis on biogenic apatite. Changes in phosphate oxygen isotopic composition (Î´18OPO4), nitrogen content (wt.% N) and…	No
2-s2.0-47849084567	2008	Genetic and life-history trait variation of the amphipod Melita plumulosa from polluted and unpolluted waterways in eastern Australia	To monitor genetic diversity and environmental contamination in eastern Australia, toxicity studies have employed the sensitive benthic amphipod Melita plumulosa. The goal of this study was to examine the genetic and life-history variability of natural populations of M. plumulosa from the Parramatta (polluted) and Hawkesbury (unpolluted) Rivers. The underlying genetics of the populations in these…	No
2-s2.0-56349163827	2008	Links between tropical Pacific SST and cholera incidence in Bangladesh: Role of the eastern and central tropical Pacific	Recent studies arising from both statistical analysis and dynamical disease models indicate that there is a link between incidence of cholera, a paradigmatic waterborne bacterial disease (WBD) endemic to Bangladesh, and the El NiÃ±o-Southern Oscillation (ENSO). However, a physical mechanism explaining this relationship has not yet been established. A regionally coupled, or \pacemaker,\" configura…	No
2-s2.0-48249114173	2008	Development of an automated procedure for estimation of the spatial variation of runoff in large river basins	The use of distributed parameter models to address water resource management problems has increased in recent years. Calibration is necessary to reduce the uncertainties associated with model input parameters. Manual calibration of a distributed parameter model is a very time consuming effort. Therefore, more attention is given to automated calibration procedures. This paper describes the develop…	No
2-s2.0-54049108126	2008	A large waterborne outbreak of campylobacteriosis in Norway: The need to focus on distribution system safety	Background: On 7 May 2007 the medical officer in RÃ¸ros (population 5600) reported 15 patients with gastroenteritis. Three days later he estimated hundreds being ill. Untreated tap water from a groundwater source was suspected as the vehicle and chlorination was started 11 May. Campylobacter was isolated from patients' stool samples. We conducted an investigation to identify the source and descri…	No
2-s2.0-51649084727	2008	Miniaturized setup for fluorescence sensing with optodes: Characterization of a new hemicyanine ion-selective-based membrane	A miniaturized and robust optical fluorosensor, designed as a portable instrumentation for the in situ analysis of ions in water samples by using optodes has been constructed with low cost discrete optical components. The chemical recognition element of the device consists of a plasticized PVC-based fluorescent optode, which includes a new hexamethine-hemicyanine dye as a fluorophore. The signal …	No
2-s2.0-52649138420	2008	Integrated storm-water management for watershed sustainability	One aspect of integrated watershed management evaluates the impact of development on the local hydrologic cycle and, in particular, drinking water, wastewater, and storm-water infrastructure. Sustainable storm-water management focuses on selecting storm-water controls based on an understanding of the problems in local receiving waters that result from runoff discharges. For example, long-term pro…	No
2-s2.0-52649136067	2008	Nonpoint source phosphorus trading in the Cherry Creek reservoir watershed in Colorado	The Cherry Creek Reservoir in the Denver Metropolitan area is subject to the Cherry Creek Reservoir Control Regulation (control regulation), which establishes a total maximum annual load for the reservoir of 6,473 kg (14,270 lb) of phosphorus. The load is distributed among phosphorus sources including background, nonpoint, and regulated storm water, municipal and industrial wastewater facilities,…	No
2-s2.0-53449095192	2008	Effects of a low concentration hypochlorous acid nasal irrigation solution on bacteria, fungi, and virus	Objectives/Hypothesis: Saline irrigation would be more effective for chronic sinusitis patients if it had bactericidal effects. Low concentrations of hypochlorous acid may be used as a nasal irrigation solution. First, we developed a 0.85% NaCl solution by adding NaCl to tap water (pH 7.0 and 8.4) and measuring the concentration of free chlorine and hypochlorous acid after giving the solution a s…	No
2-s2.0-53949119149	2008	Differential metallothionein induction patterns in fed and starved carp (Cyprinus carpio) during waterborne copper exposure	Starved and fed carp (Cyprinus carpio) were exposed to sublethal waterborne copper exposure (1 Î¼M) for 28 d in softened Antwerp, Belgium, city tap water. Copper accumulation in liver and gill tissues was determined, and changes in branchial Na+/K+-adenosine 5â€²-triphosphatase (ATPase) activity and metallothionein (MT) induction in gill and liver tissues were investigated following 28-d copper e…	No
2-s2.0-50649107720	2008	Inactivated infectious haematopoietic necrosis virus (IHNV) vaccines	The inactivation dynamics of infectious haematopoietic necrosis virus (IHNV) by Î²-propiolactone (BPL), binary ethylenimine (BEI), formaldehyde or heat and the antigenic and immunogenic properties of the inactivated vaccines were evaluated. Chemical treatment of IHNV with 2.7 mm BPL, 1.5 mm BEI or 50 mm formaldehyde abolished virus infectivity within 48 h whereas heat treatment at 50 or 100 Â°C r…	No
2-s2.0-65949112699	2008	Hydro-chemical assessment and groundwater recharge mechanism in the humid tropics a case study	The study related to assessment of various chemical constituents in the groundwater, their origin and suitability for human use has been carried out in the Chaliyar river basin of Kerala (India). Groundwater samples were collected from 27 open dug wells and 7 bore wells, and analyzed. Piper tri-linear classification was followed in segregating the data with respect to source of dissolved constitu…	No
2-s2.0-56549117430	2008	Plasma levels of nitrite and nitrate in early and recent classes of fish	The stable metabolite of nitric oxide in plasma is NOx, the sum of nitrite plus nitrate. Measures of plasma NOx may provide information about the nitric oxide tonus of the entire endothelium including capillary microvessels. Although data are available for mammalian species, plasma NOx measurements in early vertebrate species are scarce. The purpose of this study was to test the hypothesis that p…	No
2-s2.0-55649091038	2008	Assessment of recent short-term water-level fluctuations in caspian sea using Topex/Poseidon	The Caspian Sea (CS) has long been the focus of an interest due to its large water-level fluctuations. The primary factors of the CS water-level variations have usually been deemed to changes in climatic parameters. The climate-induced changes particularly in precipitation over Volga River catchment and evaporation over CS mainly affect the CS level (CSL). We constructed extended and refined Tope…	No
2-s2.0-51649084501	2008	Portal protein diversity and phage ecology	Oceanic phages are critical components of the global ecosystem, where they play a role in microbial mortality and evolution. Our understanding of phage diversity is greatly limited by the lack of useful genetic diversity measures. Previous studies, focusing on myophages that infect the marine cyanobacterium Synechococcus, have used the coliphage T4 portal-protein-encoding homologue, gene 20 (g20)…	No
2-s2.0-58149141573	2008	Construction of nickel (II) PVC membrane electrochemical sensor based on 5-methoxy-5,6-diphenyl-4,5 dihydro-3(2H)-pyridazinethione as a novel ionophore	The PVC membrane containing 5-methoxy-5,6-diphenyl-4,5 dihydro-3(2H)-pyridazinethione (LH2) as a suitable ionophore, exhibits a Nernstian response for Ni2+ ions over a wide concentration range between 1.0 Ã— 10-2 and 1 Ã— 10-6 M, with a limit of detection of 6.7 Ã— 10-7 M. It has a fast response time (<15 s), operates well in the pH range of 4.0-6.0 and can be used for at least 45 days without ob…	No
2-s2.0-51549097711	2008	Removal of propham from water by using electro-Fenton technology: Kinetics and mechanism	The removal of a carbamate herbicide, propham, from aqueous solution has been carried out by the electro-Fenton process. Hydroxyl radical, a strong oxidizing agent, was generated catalytically and used for the oxidation of propham aqueous solutions. The degradation kinetics of propham evidenced a pseudo-first order degradation. The absolute rate constant of second order reaction kinetics between …	No
2-s2.0-54349085098	2008	Geogene and anthropogenic controls on the mineralogy and geochemistry of modern alluvial-(fluvial) gold placer deposits in man-made landscapes in France, Switzerland and Germany	Five study areas in the CÃ©vennes, France, the Gotthard Massif, Switzerland, and from the western edge of the Bohemian Massif, Germany, have been selected for an investigation of the natural and human impacts on modern alluvial-(fluvial) gold placer deposits. The current investigation involved the study of grain-related parameters such as morphology, grain size and accessory minerals in gold aggr…	No
2-s2.0-54849189800	2008	Novel process for simultaneous removal of No<inf>x</inf> and So<inf>2</inf> from simulated flue gas by using a sustainable Ag(I)/Ag(II) redox mediator	The objective of this work is to develop a sustainable process for simultaneous removal of waste gases such as NO, NO2, and SO 2 by an electrochemically generated Ag(I)/Ag(II) redox mediator system. High removal efficiency was achieved for NO and SO2 by the wet scrubbing method at room temperature and atmospheric pressure. This removal is achieved through oxidation and absorption by contacting th…	No
2-s2.0-55849118450	2008	Automated RFLP pattern comparison and similarity coefficient calculation for rapid delineation of new and distinct phytoplasma 16Sr subgroup lineages	Phytoplasmas are cell wall-less bacteria that cause numerous diseases in several hundred plant species. During adaptation to transkingdom parasitism in diverse plant and insect hosts, phytoplasma evolution has given rise to widely divergent lineages. Since phytoplasmas cannot be cultured in a cell-free medium, measurable phenotypic characters suitable for conventional microbial classification are…	No
2-s2.0-51849132414	2008	Exposure and effects assessment of resident mink (Mustela vison) exposed to polychlorinated dibenzofurans and other dioxin-like compounds in the Tittabawassee River Basin, Midland, Michigan, USA	Historically, sediments and floodplain soils of the Tittabawassee River (TR; MI, USA) have been contaminated with polychlorinated dibenzofurans (PCDFs), polychlorinated dibenzo-p-dioxins (PCDDs), and polychlorinated biphenyls (PCBs). Median concentrations of 2,3,7,8-tetrachlorodibenzo-p-dioxin equivalents (TEQs) based on 2006 World Health Organization tetrachlorodibenzo-p-dioxin toxic equivalency…	No
2-s2.0-53549120226	2008	Model calculations of total maximum daily loads of mercury for drainage lakes	The Watershed Analysis Risk Management Framework watershed model was enhanced to simulate the transport and fate of mercury and to calculate the fish mercury concentrations (FMC) attained by fish through the food web. The model was applied to Western Lake Superior Basin of Minnesota, which has many peat lands and lakes. Topographic, land use, and soil data were used to set up the model. Meteorolo…	No
2-s2.0-67349094502	2008	Photo-oxidative destruction of hemoglobin in aqueous solutions using high-intensity pulsed continuous-spectrum radiation	A new oxidative process for the destruction of organic proteinaceous compounds in aqueous solutions, based on the combined use of high-intensity pulsed continuous-spectrum radiation and hydrogen peroxide, is proposed and tested experimentally. The radiation source was a high-power pulsed xenon lamp. Studies using an aqueous hemoglobin solution as an example demonstrated the efficient photo-oxidat…	No
2-s2.0-48849104453	2008	Source identification of volcanic ashes by geochemical analysis of well preserved lacustrine tephras in Nahuel Huapi National Park	Well preserved volcanic ashes produced in recent events, recovered from sedimentary sequences extracted from three lakes belonging to Nahuel Huapi National Park, Northern Patagonia, were geochemically characterized in order to reveal patterns that allow the identification of the source. Two water bodies are situated in the direct impact area of volcanoes Calbuco and Puyehue-CordÃ³n Caulle, while …	No
2-s2.0-54849413185	2008	Daphnia paleogenetics and environmental change: Deconstructing the evolution of plasticity	It is only recently that ecologists, including limnologists, have begun to appreciate the potential for organisms to evolve rapidly in response to environmental change. The resulting changes in the mean characteristics of the evolving populations have the potential to alter population, community and ecosystem responses to environmental changes - while those changes are still taking place. Viable …	No
2-s2.0-49249111952	2008	Numerical evaluation of pollutant dispersion in the built environment: Comparisons between models and experiments	Steady-state RANS Computational Fluid Dynamics (CFD) simulations of pollutant dispersion in the neutrally stable atmospheric boundary layer are made with the commercial code Fluent 6.1 for three case studies: plume dispersion from an isolated stack, low-momentum exhaust from a rooftop vent on an isolated cubic building model and high-momentum exhaust from a rooftop stack on a low-rise rectangular…	No
2-s2.0-52949083953	2008	Low-dimensional characteristics of a transonic jet. Part 1. Proper orthogonal decomposition	An experimental investigation concerning the most energetic turbulent features of the flow exiting from an axisymmetric converging nozzle at Mach 0.85 and ambient temperature is discussed using planar optical measurement techniques. The arrangement of the particle image velocimetry (PIV) system allows for all three components of the velocity field to be captured along the (r, Î¸)-plane of the jet…	No
2-s2.0-54749137450	2008	Bayesian analysis of interference cancellation for Alamouti multiplexing	Space-time codes built out of Alamouti components have been adopted in wireless standards such as UMTS, IEEE 802.11n, and IEEE 802.16, where they facilitate higher data rates through multiplexing of parallel data streams and the addition of two or more antennas at the receiver that perform interference cancellation. This correspondence provides new theoretical insight into different algorithms fo…	No
2-s2.0-52949084693	2008	Sediment geochemistry of Al, Fe, and P for two historically acidic, oligotrophic Maine lakes	Phosphorus (P) may be liberated from lake sediments by reductive dissolution of Fe(OH)3(S) during periods of hypolimnetic anoxia. P, however, remains adsorbed to Al(OH)3(S) regardless of redox conditions. During chronic or episodic acidification of a catchment, ionic Al is mobilized from soils to receiving waters. A fraction of the mobilized Al may precipitate as a consequence of higher pH of the…	No
2-s2.0-53749105030	2008	Isolation of copper and streptomycin resistant phytopathogenic Pseudomonas syringae from lakes and rivers in the central north island of New Zealand	Plant pathogenic strains of Pseudomonas syringae were isolated from lakes and rivers in the central North Island of New Zealand. These strains were identified by their ability to produce a fluorescent pigment on a modified King's B medium, by their ability to cause a hypersensitive reaction when infiltrated into tobacco plant and by the absence of a cytochrome c oxidase. Different aspects of the …	No
2-s2.0-56749096628	2008	Characterization of the bacterial population and chemistry in the bottom sediment of a laterally subdivided drinking water reservoir system	Sediments in standing waters are complex habitats that are able to provide favorable living conditions for manifold microbial species. The aim of this study was to investigate the spatial and seasonal composition of bacteria in freshwater sediments and the chemical conditions. Four sampling points were investigated at monthly intervals along the flow of water from a pre-reservoir down to the main…	No
2-s2.0-53049086654	2008	Solid-phase extraction of fluoroquinolones from aqueous samples using a water-compatible stochiometrically imprinted polymer	A novel and simple method for the selective cleanup and preconcentration of fluoroquinolone antibiotics in environmental water samples has been developed using molecularly imprinted polymer solid-phase extraction (MISPE). The molecularly imprinted polymer (MIP) has been prepared using enrofloxacin (ENR) as the template and a stoichiometric quantity of urea-based functional monomer to target the s…	No
2-s2.0-50549084784	2008	A novel slurry sampling analysis of lead in different water samples by electrothermal atomic absorption spectrometry after coprecipitated with cobalt/pyrrolidine dithiocarbamate complex	A preconcentration/separation technique based on the coprecipitation of lead with cobalt/pyrrolidine dithiocarbamate complex (Co(PDC)2) and subsequently its direct slurry sampling determination by electrothermal atomic absorption spectrometry (AAS) was described. For this purpose, at first, lead was coprecipitated with cobalt/pyrrolidine dithiocarbamate complex formed using ammonium pyrrolidine d…	No
2-s2.0-52949143111	2008	Differentiation of transport for particulate and dissolved water chemistry load indices in rainfall-runoff from urban source area watersheds	Control of coupled hydrology and pollutant transport from urban areas generally specify a runoff (or rainfall) depth for treatment. Incarnations of such coupled transport and control include the \first flush\" and recent, albeit similar, \"water quality volume\" (WQV) concepts. For a century the first flush, a mass limited behavior, has been held as the singular transport phenomena for urban area…	No
2-s2.0-54849433806	2008	Traceability of emerging contaminants from wastewater to drinking water	Due to the incomplete elimination of some human contaminants during wastewater treatment, some of these compounds can be found in surface waters or groundwaters which are used as raw waters for drinking water production. The treatment efficiency to completely eliminate these emerging contaminants or to partially remove them will determine the quality of the final treated water. Up to today, few s…	No
2-s2.0-54849441451	2008	Emerging contaminants in waste waters: Sources and occurrence	There is a growing concern about possible ecotoxicological importance of various classes of emerging contaminants in the environment. Numerous field studies designed to provide basic scientific information related to the occurrence and potential transport of specific classes of emerging contaminants in the environment are being conducted with the aim to identify the sources and points of entry of…	No
2-s2.0-54849408177	2008	Removal of emerging contaminants in wastewater treatment: Conventional activated sludge treatment	Persistent organic pollutants released from wastewater discharges into the environment can persist in the environment, bioaccumulate through the food web, enter drinking water production and pose a risk to human health and the environment. Conventional activated sludge (CAS) treatments are usually designed to remove or to decrease the concentrations of pathogens and the loads of the bulk organic …	No
2-s2.0-52949131876	2008	Occurrence of diclofenac and selected metabolites in sewage effluents	Many pharmaceuticals along with their metabolites have been detected in environmental water samples in the recent decades. The analgesic diclofenac is widely used and thus enters the aquatic environment. Already at realistic environmental concentration levels harmful effects to different organisms have been demonstrated. As this could also be expected for its metabolites, their fate was examined.…	No
2-s2.0-53249125061	2008	Acute and chronic aquatic toxicity of ammonium perfluorooctanoate (APFO) to freshwater organisms	Recent concerns have been raised concerning the widespread distribution of perfluorinated compounds in environmental matrices and biota. The compounds of interest include ammonium perfluorooctanoate (APFO, the ammonium salt of perfluorooctanoic acid, PFOA). APFO is used primarily as a processing aid in the production of fluoropolymers and fluoroelastomers. The environmental presence of perfluoroo…	No
2-s2.0-55349103378	2008	Sonochemical degradation of perfluorooctane sulfonate (PFOS) and perfluorooctanoate (PFOA) in landfill groundwater: Environmental matrix effects	Perfluorinated chemicals such as perfluorooctane sulfonate (PFOS) and perfluorooctanoic acid (PFOA) are environmentally persistent and recalcitrant to most conventional chemical and microbial treatment technologies. In this paper, we show that sonolysis is able to decompose PFOS and PFOA present in groundwater beneath a landfill. However, the pseudo first-order rate constant for the sonochemical …	No
2-s2.0-53049102749	2008	Processes of attenuation of dissolved arsenic downstream from historic gold mine sites, New Zealand	Mine and processing sites in the mesothermal gold deposits of the Reefton gold field, New Zealand, generate extremely high dissolved As concentrations (up to 59 mg/L). Attenuation of these waters takes place by at least one of the three mechanisms: (1) precipitation of the secondary arsenic mineral scorodite, (2) chemisorption onto iron oxyhydroxide (HFO) and (3) dilution with regional catchment …	No
2-s2.0-53249113719	2008	Impact of single and repeated applications of the insecticide chlorpyrifos on tropical freshwater plankton communities	This paper describes the effects of a single and a repeated application of the organophosphorus insecticide chlorpyrifos on zooplankton and phytoplankton communities in outdoor microcosms in Thailand. Treatment levels of 1 Î¼g L-1 were applied once or twice with a 2-week interval. Both treatments led to a significant decrease in cladocerans followed by an increase in rotifers, although the extent…	No
2-s2.0-53149090957	2008	Fast analysis of relative levels of dehydroabietic acid in papermaking process waters by on-line sample enrichment followed by atmospheric pressure chemical ionisation-mass spectrometry (APCI-MS)	Resin acids are considered to be significant contributors to the toxicity of pulp mill effluents. Traditionally, the analysis of these acids is performed by liquid-liquid extraction followed by gas chromatography. This paper describes a method suitable for monitoring the relative concentration levels of the main resin acid component, dehydroabietic acid (DHAA), in process waters by atmospheric pr…	No
2-s2.0-56049116451	2008	Molecular modeling of metal complexation by a fluoroquinolone antibiotic	An understanding of the factors controlling the chemodynamics of fluoroquinolone antibiotics in different environmental matrices is a necessary prerequisite to the assessment of their potential impact on nontarget organisms in soils and receiving waters. Of particular interest are the complexes formed between fluoroquinolones and metal cations, which are believed to be important in the mechanism …	No
2-s2.0-52949084377	2008	The environmental fate of arsenic in surface soil contaminated by historical herbicide application	Soils from many industrial sites are contaminated with arsenic because of the historical application of herbicide containing arsenic trioxide. The strong affinity of aqueous arsenic species for soil components has led to the retention of significant amounts of arsenic in surface soils decades after the original source application. Soil collected from a site which received a one-time surficial app…	No
2-s2.0-48049096370	2008	Application of chemical fractionation methods for characterisation of biofuels, waste derived fuels and CFB co-combustion fly ashes	In the important efforts to decrease the net CO2 emissions to the atmosphere, new, alternative fuels are being included in the fuel mixes used in utility boilers. However, these fuels have ash properties that are different from those of the traditionally used fuels and in some cases technical problems, such as ash fouling and corrosion occur due to this. Therefore, diagnostic and predictive metho…	No
2-s2.0-56249085957	2008	Simulation of the influence of aerosol particle characteristics on clouds and precipitation with LM-SPECS: Model description and first results	The novel model system LM-SPECS is presented combining a spectral bin microphysics scheme and the three-dimensional Lokalmodell (LM, today called COSMO) of the German Weather Service (\Deutscher Wetterdienst\"). The model is designed to investigate in detail the interaction of atmospheric aerosol particles, clouds and precipitation. The microphysics scheme includes a combined spectrum of wetted a…	No
2-s2.0-54049134710	2008	Sensory complementation and the acquisition of predator recognition by salmonid fishes	Following disturbance, some aquatic prey species release chemicals that act as a warning cue and increase vigilance in nearby conspecifics. Such disturbance cues evoke consistent low intensity anti-predator responses. In contrast, alarm cues from injured conspecifics often evoke stronger intensity responses in prey animals. In this study, we test the sensory complement hypothesis, which suggests …	No
2-s2.0-54949112909	2008	Common proper motion companions to nearby stars: Ages and evolution	A set of 41 nearby stars (closer than 25 pc) is investigated which have very wide binary and common proper motion (CPM) companions at projected separations between 1000 and 200,000 AU. These companions are identified by astrometric positions and propermotions from the NOMAD catalog. Based mainly on measures of chromospheric and X-ray activity, age estimation is obtained for most of 85 identified …	No
2-s2.0-50249187644	2008	Waste settlement in bioreactor landfill models	Prediction of landfill settlement is one of the important parameters that affects the design and maintenance of bioreactor landfills. Due to the large number of variables involved in the settlement mechanism, accurate prediction of landfill settlement is a real challenge. The operational protocol of a landfill, the presence of municipal sludge from treatment plants, the addition of soybean peroxi…	No
2-s2.0-55549108665	2008	Cuticular hydrocarbons and soldier defense secretions of Reticulitermes in southern California: A critical analysis of the taxonomy of the genus in North America	Cuticular hydrocarbons (CHC) and soldier defense secretions (SDS) were characterized for collections of Reticulitermes from six counties (Los Angeles, Orange, Riverside, San Bernardino, San Diego, and Santa Barbara) in southern California. Collection sites included the type locality for R. hesperus, Lake Arrowhead (formerly known as Little Bear Lake) in the San Bernardino Mountains. In southern C…	No
2-s2.0-55049109179	2008	Bevacizumab reduces the growth rate constants of renal carcinomas: A novel algorithm suggests early discontinuation of bevacizumab resulted in a lack of survival advantage	Background. To hasten cancer drug development, new paradigms are needed to assess therapeutic efficacy. In a randomized phase II study in patients with renal cell carcinoma, 10 Î¼g/kg bevacizumab (AvastinÂ®; Genentech, Inc., South San Francisco, CA) administered every 2 weeks resulted in a longer time to progression but a statistically significant difference in overall survival could not be demon…	No
2-s2.0-56849120374	2008	The soil C pool in different agroecosystems derived from the dry tropical forest of Guanacaste, Costa Rica	Inventories of soil C pools are still lacking from tropical sites. Our objective was to assess total C and N concentrations in the different mineral soil fractions down to 50 cm depth in relation to selected physical and chemical properties of 5 ecosystems at La Flor Sustainable Center in Guanacaste, Costa Rica. The ecosystems studied were a derived savanna with scattered trees, a gallery forest,…	No
2-s2.0-55149091556	2008	Australian rainfall patterns and the southern oscillation. 2. A regional perspective in relation to Luni-solar (Mn) and Solar-cycle (Sc) signals	This investigation is an extension of earlier work on rainfall patterns in eastern Australia. Using district averages rather than rainfall data for individual cities or towns, further evidence is provided for cyclic variations in precipitation with periods of 18-19, 10-11 and 6-7 years. Results from various regional areas in western Queensland and western New South Wales differ from those found f…	No
2-s2.0-56449088366	2008	In situ long-term reductive bioimmobilization of Cr(VI) in groundwater using hydrogen release compound	The results of a field experiment designed to test the effectiveness of a novel approach for long-term, in situ bioimmobilization of toxic and soluble Cr(VI) in groundwater using a hydrogen release compound (HRC) - a slow release glycerol polylactate - are described. The field experiment was conducted atthe Hanford Site (Washington), a U.S. Department of Energy nuclear production facility, using …	No
2-s2.0-53149121630	2008	Assessment of C-band synthetic aperture radar data for mapping and monitoring Coastal Plain forested wetlands in the Mid-Atlantic Region, U.S.A.	Multi-temporal C-band SAR data (C-HH and C-VV), collected by ERS-2 and ENVISAT satellite systems, are compared with field observations of hydrology (i.e., inundation and soil moisture) and National Wetland Inventory maps (U.S. Fish and Wildlife Service) of a large forested wetland complex adjacent to the Patuxent and Middle Patuxent Rivers, tributaries of the Chesapeake Bay. Multi-temporal C-band…	No
2-s2.0-54149113114	2008	Prolegomena to sediment and flow connectivity in the landscape: A GIS and field numerical assessment	This paper presents two new definitions of sediment and water flux connectivity (from source through slopes to channels/sinks) with examples of applications to sediment fluxes. The two indices of connectivity are operatively defined, one (IC) that can be calculated in a GIS environment and represents a connectivity assessment based on landscape's information, and another that can be evaluated in …	No
2-s2.0-55849109643	2008	Anammox process for synthetic and practical wastewater treatment using a novel kind of biomass carriers	The anammox process, as an alternative to conventional nitrogen removal technologies, has abstracted much attention in recent years. In this study, one column-type reactor using a novel support material - net type acrylic fiber (Biofix) - was used for anammox treatment. The Biofix reactor was operated at 25Â°C (peak summer temperature, 31.5Â°C). Over 330 days of operation for synthetic wastewater…	No
2-s2.0-57449094163	2008	Encapsulated in silica: Genome, proteome and physiology of the thermophilic bacterium Anoxybacillus flavithermus WK1	Background: Gram-positive bacteria of the genus Anoxybacillus have been found in diverse thermophilic habitats, such as geothermal hot springs and manure, and in processed foods such as gelatin and milk powder. Anoxybacillus flavithermus is a facultatively anaerobic bacterium found in super-saturated silica solutions and in opaline silica sinter. The ability of A. flavithermus to grow in super-sa…	No
2-s2.0-56049103572	2008	Objectives for optimization and consequences for operation, design and concept of drinking water treatment plants	Optimization for operation of drinking water treatment plants should focus on water quality and not on environmental impact or costs. Using improvement of water quality as objective for optimization can lead to new views on operation, design and concept of drinking water treatment plants. This is illustrated for ozonation in combination with biological activated carbon (BAC) filtration at drinkin…	No
2-s2.0-56849104882	2008	A constructed alkaline consortium and its dynamics in treating alkaline black liquor with very high pollution load	Background: Paper pulp-wastewater resulting from alkaline extraction of wheat straw, known as black liquor, is very difficult to be treated and causes serious environmental problems due to its high pH value and chemical oxygen demand (COD) pollution load. Lignin, semicellulose and cellulose are the main contributors to the high COD values in black liquor. Very few microorganisms can survive in su…	No
2-s2.0-56349145670	2008	Neuroborreliosis in the South West of England	Although Lyme borreliosis is increasingly diagnosed in the United Kingdom, few systematic studies have been performed there. UK data suggest that the commonest complications are neurological, but inadequate information exists about their nature and the incidence of late neuroborreliosis. Local data are necessary because clinical presentations may show geographical variation. This study aimed to p…	No
2-s2.0-43149083170	2008	Bleeping you out of the blink: Sound saves vision from oblivion	The second of two targets (T2) presented in a rapid visual stream is often missed when presented shortly after the first (T1). This phenomenon has been referred to as the attentional blink. Here we show that the presentation of a synchronous sound enables T2 to escape the attentional blink, to the extent that performance was back at the level of T1. The sound also improved T1 identification, with…	No
2-s2.0-57849167982	2008	Effects of cluster light exposure on 3-isobutyl-2-methoxypyrazine accumulation and degradation patterns in red wine grapes (Vitis vinifera L. Cv. Cabernet Franc)	The effects of light exposure on 3-isobutyl-2-methoxypyrazine (IBMP) accumulation and degradation in Vitis vinifera L. cv. Cabernet Franc berries were assessed by comparison of shaded and exposed clusters within the same vine throughout a growing season. Twenty-seven vines were shoot-thinned to create regions of high and low cluster-light exposure within each vine. Samples were collected at 10 ti…	No
2-s2.0-57649109441	2008	Gold nanospheres and nanonecklaces generated by laser ablation in supercritical fluid	Nanosecond pulsed laser ablation of gold with an excitation wavelength of 532 nm was conducted in supercritical CO2 to generate gold nanoparticles, which were then investigated by scanning electron microscopy and small-angle X-ray scattering, and their extinction spectra and simulated extinction spectra were studied. Both the morphology and amount of gold nanoparticles changed significantly with …	No
2-s2.0-55549133258	2008	A preparation zone for volcanic explosions beneath Naka-dake crater, Aso volcano, as inferred from magnetotelluric surveys	The 1st crater of Naka-dake, Aso volcano, is one of the most active craters in Japan, and known to have a characteristic cycle of activity that consists of the formation of a crater lake, drying-up of the lake water, and finally a Strombolian-type eruption. Recent observations indicate an increase in eruptive activity including a decrease in the level of the lake water, mud eruptions, and red hot…	No
2-s2.0-56449083885	2008	Fate and toxicity of emerging pollutants, their metabolites and transformation products in the aquatic environment	There has been a great effort to study the fate, the occurrence and the ecotoxicology of emerging pollutants in the aquatic environment. Recently, several articles have focused on degradation products of emerging pollutants and the study of their toxicological effects. We review the fate and the ecotoxicology of emerging pollutants, especially focusing on their metabolites and transformation prod…	No
2-s2.0-57349196516	2008	Ranking of pharmaceuticals detected in the environment: Aggregation and weighting procedures	Pharmaceuticals are omnipresent in waste-water world-wide. Research has shown that many pharmaceuticals are not completely removed during wastewater treatment, and as a result, this has led to their occurrence being reported in waste water treatment plant effluents, rivers and lakes, and more rarely in groundwater and in drinking water. Hence, it is only logical that pharmaceutical residues in th…	No
2-s2.0-77957981105	2008	Current status of the metal pollution of the environment of Greece - A review	Pollution from metals and metalloids of the environment of Greece seemed to attract many researchers and elemental pollutants in air, soil and water have been determined and studied systematically during the last decade. The most recent of these studies, concerning the last five years (2003 to 2008), were reviewed and the major problems of the occurrence of heavy metals in the country's environme…	No
2-s2.0-54949092757	2008	The coupling of surface seawater organic nitrogen and the marine aerosol as inferred from enantiomer-specific amino acid analysis	Atmospheric deposition is now well recognised as a major source of both inorganic and organic nitrogen for many aquatic ecosystems. In the present study HPLC was used to determine d and l amino acids in remote Atlantic aerosol samples and surface seawater particulate material. This work provides molecular evidence for both microbial and phytoplankton contributions to the organic nitrogen content …	No
2-s2.0-45549099757	2008	Yersinia pestis biofilm in the flea vector and its role in the transmission of plague	Transmission by fleabite is a relatively recent evolutionary adaptation of Yersinia pestis, the bacterial agent of bubonic plague. To produce a transmissible infection, Y. pestis grows as an attached biofilm in the foregut of the flea vector. Biofilm formation both in the flea foregut and in vitro is dependent on an extracellular matrix (ECM) synthesized by the Yersinia hms gene products. The hms…	No
2-s2.0-57449117513	2008	Changes in aluminum concentrations and speciation in lakes across the northeastern U.S. following reductions in acidic deposition	We surveyed 113 lakes in the northeastern U.S. in 2001 that had previously been sampled in 1986 to evaluate the effects of reductions in acidic deposition on the concentrations and speciation of aluminum (Al). We found ubiquitous decreases in the concentrations of total Al and inorganic monomeric aluminum (Ali) across the region. Median total Al decreased from 1.45 to 1.01 Î¼mol L-1 across the re…	No
2-s2.0-80052776132	2008	Leaching of organic halogen compounds from sewage sludge to the aqueous phase under model conditions | ?ugowanie zwia?zków chlorowcoorganicznych z osadów ?ciekowych do fazy wodnej w warunkach modelowych	Halogens can be very harmful to the environment, which is due to their high durability, poor biodegradability, toxicity (mutagenicity and cancerogenicity) and cumulative toxicity. Their presence and migration should be under stringent control, and their amount needs to be reduced. One of the methods used for removing organic halogens from certain elements of the environment is applying sorbents, …	No
2-s2.0-56749139866	2008	Acute toxicity and bioaccumulation of arsenic in freshwater clam Corbicula fluminea	Arsenic is a potent human carcinogen of skin, lung, and urinary bladder. Freshwater clam Corbicula fluminea is a commercially important native species in Taiwan. C. fluminea is also a suitable biomonitoring test organism. Little is known, however, about the actual effects of arsenic on C. fluminea. The objectives of this study were to provide information on the acute toxicity and bioaccumulation …	No
2-s2.0-80052765920	2008	Separation of surface active agents from water solutions using polymer ultrafiltration membranes | Zastosowanie polimerowych membran ultrafiltracyjnych do usuwania substancji powierzchniowo czynnych z roztworów wodnych	Surface active agents, also called surfactants, are amphiphilic compounds that contain both a hydrophobic and a hydrophilic portion. In aqueous solutions, surfactant monomers aggregate into structures called micelles with hydrophobic groups in the interior of the micellar structures. The minimum concentration at which micellization occurs is called the critical micelle concentration (CMC). At hig…	No
2-s2.0-67449090052	2008	Mechanisms of contaminant transport in a multi-basin lake	Tracer studies are combined with a three-dimensional (3-D) numerical modeling study to provide a robust description of hydrodynamic and particle transport in Clear Lake, a multi-basin, polymictic lake in northern California, USA. The focus is on the mechanisms of transport of contaminants away from the vicinity of the Sulphur Bank Mercury Mine and out of the Oaks Arm to the rest of the lake and t…	No
2-s2.0-67049170919	2008	Phylogenetic analysis of intestinal bacteria of freshwater salmon Salmo salar and sea trout Salmo trutta trutta and diet	The microbial diversity of culturable intestinal microflora of wild freshwater salmonid fishes salmon Salmo salar and sea trout Salmo trutta trutta juveniles (0+ years old) from the same environmental conditions were investigated by means of molecular identification techniques and analysis of diet. Significant differences in the intestinal microbial diversity were observed in different fish speci…	No
2-s2.0-55649089870	2008	Rapid immobilisation and leaching of wet-deposited nitrate in upland organic soils	Nitrate (NO3-) is often observed in surface waters draining terrestrial ecosystems that remain strongly nitrogen (N) limited. It has been suggested that this occurs due to hydrological bypassing of soil or vegetation N retention, particularly during high flows. To test this hypothesis, artificial rain events were applied to 12 replicate soil blocks on a Welsh podzolic acid grassland hillslope, la…	No
2-s2.0-56649124731	2008	Stream fish assemblages in relation to environmental factors on a montane plateau (Nyika Plateau, Malawi)	Few studies have examined river fishes of Malawi. This study is one of the first to examine the stream fish assemblages on the Nyika Plateau in northern Malawi. Twenty four sites were sampled over three different periods in two river systems of the plateau. Eighteen species were collected and among these was Hippopotamyrus ansorgii, the first collection of this species in the Lake Malawi catchmen…	No
2-s2.0-58149250643	2008	Effects of everolimus as an antiproliferative agent on regression of encapsulating peritoneal sclerosis in a rat model.	The most serious complication of peritoneal dialysis is encapsulating peritoneal sclerosis (EPS). The prolonged inflammatory stimuli, fibrogenic cytokine overexpression, and angiogenesis that underlie EPS ultimately result in increased production of fibrous tissue, encapsulating the bowel loops. In recent years, inhibitors of mammalian target of rapamycin (mTOR) as an alternative agent for calcin…	No
2-s2.0-58149359028	2008	Near-surface external-casing corrosion in Alaska: Cause and mitigation	Recently, a number of external-casing failures on a group of relatively new wells in the Kuparuk field of Alaska prompted an investigation into the cause. The investigation determined that external surface-casing-corrosion failures had occurred near the top of the casing cement within the conductor. The surface-casing corrosion was found to be caused by repetitive events of surface water entering…	No
2-s2.0-58649118677	2008	Quantitative measurement techniques for binary dye mixtures: A case study in an adsorption system	Three binary dye mixtures prepared from the basic textile dyes Astrazon Blue FGRL (AB), Astrazon Red GTLN (AR), and Astrazon Golden Yellow GL-E (AY), were employed to demonstrate two different mixture characteristics. The first type of mixture (AB + AY) was the case where the optical absorbance spectra of the dye mixtures exhibited double peaks. Each peak occurred at the same wavelength as the si…	No
2-s2.0-56749105436	2008	Organization of the biosynthetic gene cluster for the polyketide antitumor macrolide, pladienolide, in Streptomyces platensis Mer-11107	Pladienolides are novel 12-membered macrolides produced by Streptomyces platensis Mer-11107. They show strong antitumor activity and are a potential lead in the search for novel antitumor agents. We sequenced the 65-kb region covering the biosynthetic gene cluster, and found four polyketide synthase genes (pldAI-pldAIV) composed of 11 modules, three genes involved in post-modifications (pldB-D), …	No
2-s2.0-57449092678	2008	Isolation of new Stenotrophomonas bacteriophages and genomic characterization of temperate phage S1	Twenty-two phages that infect Stenotrophomonas species were isolated through sewage enrichment and prophage induction. Of them, S1, S3, and S4 were selected due to their wide host ranges compared to those of the other phages. S1 and S4 are temperate siphoviruses, while S3 is a virulent myovirus. The genomes of S3 and S4, about 33 and 200 kb, were resistant to restriction digestion. The lytic cycl…	No
2-s2.0-58949090401	2008	Fate and analysis of endocrine disrupting chemicals in some sewage treatment plants in Australia	There are limited studies on the fate and levels of endocrine disrupting chemicals in sewage treatment plants in Australia. Research undertaken in Europe and North America has shown biologically significant levels of both oestrogenic and androgenic chemicals in sewage effluent. The aim of this work was to determine the oestrogenic and androgenic activities of raw and treated sewage from sewage tr…	No
2-s2.0-57149112524	2008	Spatial and temporal structure of the trematode component community in Valvata macrostoma (Gastropoda, Prosobranchia)	We conducted the first comprehensive study on the spatiotemporal structure of trematode communities in the large-mouthed valve snail, Valvata macrostoma. A total of 1103 snails were examined monthly between May and October 2007 from Lake Konnevesi, Central Finland, from a shallow (1-2 m deep) and an offshore site (5-6 m deep), located ca. 50-70 m apart. Snails were infected by 10 trematode specie…	No
2-s2.0-56949105546	2008	Organochlorine contaminants in the muscle of striped bass illegally harvested from shad gill nets in the Hudson River Estuary	character(0)	No
2-s2.0-79955859518	2008	A novel design flow for fault tolerance SRAM-Based FPGA Systems:Integrated synthesis design flow and performance otpimization	SRAM-based Field Programmable Gate Arrays (FPGAs) are programmable devices used for different applications, such as signal processing, prototyping and networking. They have fixed number of wires, switches and look-up tables (LUTs): all these components can be programmed by downloading a configuration memory with a proper bitstream, giving an FPGA the capability to implement nearly any kind of dig…	No
2-s2.0-58849083815	2008	Santonian to?earliest campanian (Late Cretaceous) fungi from the Milk River formation, Southern Alberta, Canada	During a detailed palynological study of the Milk River Formation in southern Alberta, Canada, a diverse and well-preserved assemblage of fungi including dispersed fungal spores and isolated fragments of microthyriaceous fruiting bodies were encountered and these are described. Based on ammonites, magnetostratigraphy, and palynomorphs, these strata are dated as latest Santonian to ?earliest Campa…	No
2-s2.0-57649124274	2008	Accumulation and maternal transfer of polychlorinated biphenyls in snapping turtles of the Upper Hudson River, New York, USA	We conducted field studies over three years to assess body burdens and maternal transfer of polychlorinated biphenyls (PCBs) as well as indices of sexual dimorphism in snapping turtles (Chelydra serpentina) of the upper Hudson River (NY, USA.) We collected adult turtles in areas known to be contaminated with PCBs and in nearby reference areas for measurement of body size, precloacal length, and p…	No
2-s2.0-56549094221	2008	Assessing the effectiveness of a constructed arctic stream using multiple biological attributes	Objective assessment of habitat compensation is a central yet challenging issue for restoration ecologists. In 1997, a 3.4-km stream channel, designed to divert water around an open pit diamond mine, was excavated in the Barrenlands region of the Canadian Arctic to create productive stream habitat. We evaluated the initial success of this compensation program by comparing multiple biological attr…	No
2-s2.0-84864213506	2008	Evolving magma storage conditions beneath Mount St. Helens inferred from chemical variations in melt inclusions from the 1980-1986 and current (2004-2006) eruptions	Major element, trace element, and volatile concentrations in 187 glassy melt inclusions and 25 groundmass glasses from the 1980-86 eruption of Mount St. Helens are presented, together with 103 analyses of touching Fe-Ti oxide pairs from the same samples. These data are used to evaluate the temporal evolution of the magmatic plumbing system beneath the volcano during 1980-86 and so provide a frame…	No
2-s2.0-57649136965	2008	Protectiveness of species sensitivity distribution hazard concentrations for acute toxicity used in endangered species risk assessment	A primary objective of threatened and endangered species conservation is to ensure that chemical contaminants and other stressors do not adversely affect listed species. Assessments of the ecological risks of chemical exposures to listed species often rely on the use of surrogate species, safety factors, and species sensitivity distributions (SSDs) of chemical toxicity; however, the protectivenes…	No
2-s2.0-58149486174	2008	A review on supercritical fluid extraction as new analytical method	This review study summarized the Supercritical Fluid Extraction (SFE) as new analytical method. The advantage and disadvantage of CO2 (SC-CO2 )as well as special applications of SFE in food processing such as removal of fat from food, enrichment of vitamin E from natural sources, removal of alcohol from wine and beer, encapsulation of liquids for engineering solid products and extraction and char…	No
2-s2.0-65749089519	2008	Flow-induced vibrations of a cylinder with two degrees of freedom near rigid plane boundary	Based on similarity analyses, the flow-induced vibrations of a near-wall cylinder with 2degr ees of freedom are investigated experimentally by employing a hydroelastic apparatus in conjunction with a flume. The cylinder's vibration amplitude, vibration frequency and vortex shedding frequency were measured and analyzed. The effects of gap-to-diameter ratio (e0/D) upon the vibration responses are f…	No
2-s2.0-58149463207	2008	Analysis of Reactive Dyestuffs and Their Hydrolysis by Capillary Electrophoresis	The objective of the presented research was to examine the potential of capillary electrophoresis (CE) for the analysis of structurally different reactive dyestuffs, their activation and posterior hydrolysis, with special focus on optimization of the working conditions. Preliminary, the effect of various additives to the background electrolyte on the resolution improvements versus migration time …	No
2-s2.0-80052708197	2008	Results of biological monitoring in order to renaturalize the riverbed of the dzier??cinka river in its urban part, conducted using macrozoobenthos | biomonitoring miejskiego odcinka dzier??cinki z wykorzystaniem makrozoobentosu w celu renaturyzacji koryta rzeki	Biomonitoring of the DzierÅ¼È©cinka river, a natural watercourse passing through Koszalin, was conducted in 2006. Three sites were selected, at which macrozoobenthos was three times extracted using 0.5mm mesh benthic net. 45 samples were taken. 5 qualitative and quantitative samples from each site, 4 of the former and 1 of the latter type. Analysis consisted of taxonomic affiliation, number and b…	No
2-s2.0-58249095084	2008	Hydrodynamic modeling of three-phase flow in production and gathering pipelines	The transport of unprocessed gas streams in production and gathering pipelines is becoming more attractive for new developments, particularly those in less friendly environments such as deep offshore locations. Transporting gas, oil, and water together from wells in satellite fields to existing processing facilities reduces the investments required for expanding production. However, engineers oft…	No
2-s2.0-62349118099	2008	Palm oil boom in Indonesia: From plantation to downstream products and biodiesel	Indonesia has been the biggest producer of palm oil (PO) in the world since 2005. The total production in 2007 was 17.0 and 1.9 million tons of crude palm oil (CPO) and crude palm kernel oil (CPKO), respectively. More than 70% of the CPO was exported and 87% of the domestic consumption was used for food. The production and subsequent refining and fractionation of CPO and CPKO generated biomass by…	No
2-s2.0-58549109026	2008	Comparative applications of bioreactor and shake flask system for the biodegradation of Tannin and biotreatment of composite tannery effluents	Tannin degrading microbes isolated from tannery effluents (Klebsiella pnuemoniae MTCC 7162, Pseudomonas aeruginosa and Bacillus laterosporus MTCC 6017) were tested for their ability to degrade vegetable tannins in tannery effluents, along with other polluting parameters in the effluents like Biochemical Oxygen Demand (BOD), Chemical Oxygen Demand (COD) and Total Dissolved Solids (TDS). In the sha…	No
2-s2.0-56849099843	2008	Rapid separation and determination of microcystins using monolithic columns in isocratic elution mode by pressurized capillary electrochromatography	As a new wave of technology, polymethacrylate-based monolithic column was prepared and its application in the separation of three kinds of microcystins (MCs) in pressurized capillary electrochromatography with ultraviolet detection was studied. The key factors affecting the separation performance, such as monolithic column, pressure of the pump, component and concentration of mobile phase and the…	No
2-s2.0-55749114552	2008	Chemical evolution of thermal waters and changes in the hydrothermal system of Papandayan volcano (West Java, Indonesia) after the November 2002 eruption	Papandayan is a stratovolcano situated in West Java, Indonesia. Since the last magmatic eruption in 1772, only few hydrothermal explosions have occurred. An explosive eruption occurred in November 2002 and ejected ash and altered rocks. The altered rocks show that an advanced argillic alteration took place in the hydrothermal system by interaction between acid fluids and rocks. Four zones of alte…	No
2-s2.0-58149158060	2008	Is perchlorate metabolized or re-translocated within lettuce leaves? A stable-isotope approach	Perchlorate is an environmental contaminant that is found in drinking water and a variety of foodstuffs, but many questions regarding its uptake, transport, and persistence in higher plants remain unanswered. In a series of hydroponic experiments, a stable-isotope tracer of perchlorate (95% 37ClO4-) was utilized to determine the extent of in vivo metabolism and of phloem re-translocation of perch…	No
2-s2.0-56549106897	2008	New Middle Cambrian and Middle Ordovician palaeomagnetic data from Siberia: Llandelian magnetostratigraphy and relative rotation between the Aldan and Anabar-Angara blocks	Whether Siberia was a coherent tectonic unit throughout the Phanerozoic or whether significant rotations occurred in early Palaeozoic times between the Anabar-Angara and Aldan blocks is still a matter of debate. Addressing this problem a detailed palaeomagnetic study of sections of mid Cambrian and Llandeillian age has been carried out along the river Lena, river Maya, river Kulumbe, and river St…	No
2-s2.0-54349110855	2008	Sunflower leaves tissue-based bioelectrode with amperometric flow-injection system for glycolic acid determination in urine	A novel plant tissue-based bioelectrode obtained by incorporating sunflower (Helianthus annuus L.) leaves tissue as a source of glycolate oxidase and peroxidase into a ferrocene-mediated carbon paste electrode for the determination of glycolic acid was developed. It was coupled with the flow-injection (FI) system and used as the basis to develop a novel FI amperometric procedure for glycolic acid…	No
2-s2.0-57549091754	2008	The next step in revitalizing RCRA: Maine People's Alliance and the importance of citizen intervention in EPA actions	The citizen suit provision is a key component of the 1976 amendments to the Solid Waste Disposal Act, known as the Resource Conservation and Recovery Act (RCRA), since it provides individuals with the means to initiate proceedings to protect themselves even when the Environmental Protection Agency (EPA) fails to do so. Maine People's Alliance v. Mallinckrodt, Inc. involved a citizen suit against …	No
2-s2.0-57649128329	2008	Assessment of sulfathiazole in wastewater	Antibiotics used in both human and veterinary medicine make an important group of drugs. However, the use of these compounds causes their expansion into the environment, where there accumulate and develop their resistance. It is documented that they block biological processes in wastewater treatment plants. They also affect natural ecosystems and may concentrate in food chain. Sulfonamides (widel…	No
2-s2.0-70349596931	2008	Molecular phylogeny and divergence times of ancient South American and Malagasy River turtles (Testudines: Pleurodira: Podocnemididae)	The eight extant podocnemidid species are the last survivors of a speciose ancient group of turtles known to hav existed since the Cretaceous. One species, representing the monotypic genus Erymnochelys, occurs on Madagascar; th remaining seven species are confined to South America (Peltocephalus: one species; Podocnemis: six species Phylogenetic relationships of all extant species were reconstruc…	No
2-s2.0-57749083149	2008	Identifying leakage to groundwater from Lake Rerewhakaaitu using isotopic and water quality data	Stable isotopes (18O, 2H), water dating, and major anion and cation water chemistry of springs, groundwater bores, a stream and a lake have been used to identify areas of discharge from Lake Rerewhakaaitu. Groundwater aquifers and spring discharges to the north and west of Lake Rerewhakaaitu are found to contain up to 79% lake water. Hierarchical cluster analysis is used to group sites into three…	No
2-s2.0-58149171791	2008	Atoms-in-molecules dual parameter analysis of weak to strong interactions: Behaviors of electronic energy densities versus Laplacian of electron densities at bond critical points	AIM dual parameter analysis is proposed for the better understanding of weak to strong interactions: Total electron energy densities (H b(rc) are plotted versus Laplacian of electron densities (Î”Ïb(rc)) at bond critical points (BCPs). Interactions examined in this work are those in van der Waals adducts, hydrogen bonded complexes, molecular complexes and hypervalent adducts through charge trans…	No
2-s2.0-61349120005	2008	Thermal anomalies indicate preferential flow along faults in unconsolidated sedimentary aquifers	Anomalously high (up to +8Â°C) and low (-2Â°C) groundwater temperatures, as compared to undisturbed geothermal profiles, have been observed in unconsolidated siliciclastic aquifers off-set by normal-faults in the Lower Rhine Embayment, Germany. High hydraulic head gradients, induced by pumping, over the same faults suggest that they form effective barriers to lateral groundwater flow. Numerical a…	No
2-s2.0-67650578154	2009	Presence of steroid hormones and antibiotics in surface water of agricultural, suburban and mixed-use areas	The occurrence of pharmaceutically active chemicals (PACs) in the natural aquatic environment is recognized as an emerging issue due to the potential adverse effects these compounds pose to aquatic life and humans. This study presents the monitoring of two major categories of PACs in surface water: steroid hormones and antibiotics. Surface water samples were collected in the fall season from 21 l…	No
2-s2.0-67650270145	2009	Fluoride distribution in groundwater and survey of dental fluorosis among school children in the villages of the Jhajjar District of Haryana, India	Fluoride concentration of groundwater reserves occurs in many places in the world. A critical area for such contamination in India is alluvial soil of the plain region, consisting of five blocks (Jhajjar, Bahadurgarh, Beri, Matanhail, and Sahalawas) of the Jhajjar District adjacent to the National Capital Territory of India, New Delhi. The purpose of this study was to assess the association betwe…	No
2-s2.0-70349127489	2009	Estrogen nitration kinetics and implications for wastewater treatment	Understanding estrogen-removal mechanisms in waste-water treatment is imperative, as estrogens have environmental effects at trace concentrations. Previous research investigating co-metabolic degradation of 17Î±- ethinylestradiol (EE2) by ammonia-oxidizing bacteria (AOB) revealed that, in batch tests where high nitrite-nitrogen (NO2-N) concentrations occurred as a result of ammonia-nitrogen (NH4-…	No
2-s2.0-60349129067	2009	Bulk organic matter and nitrogen removal from reclaimed water during groundwater recharge by enhanced direct injection well	Water shortages lead to increasing attention to artificial groundwater recharge by reclaimed water. A new kind of approach, enhanced direct injection-well recharge (EnDir) consisting of short- and long-term soil treatment, is considered to be suitable for large cities in China. In this paper, EnDir was simulated by soil columns in the laboratory with the secondary effluent as raw water that was o…	No
2-s2.0-56949105543	2009	Removal mechanisms for endocrine disrupting compounds (EDCs) in wastewater treatment - physical means, biodegradation, and chemical advanced oxidation: A review	Endocrine disrupting compounds (EDCs) are pollutants with estrogenic or androgenic activity at very low concentrations and are emerging as a major concern for water quality. Within the past few decades, more and more target chemicals were monitored as the source of estrogenic or androgenic activity in wastewater, and great endeavors have been done on the removal of EDCs in wastewater. This articl…	No
2-s2.0-77957293463	2009	Antimicrobial therapy for water-associated wound infections in a disaster setting: Gram-negative bacilli in an aquatic environment and lessons from banda Aceh	Introduction: As members of the JPN Disaster Relief (JDR) team in Banda Aceh, three of the authors treated 1,891 patients following the tsunami of 2004. Of the 367 cases with traumatic injuries, 216 cases required antimicrobial therapy. The medical services were continued by the JPN Self-Defense (JSD) Medical Team until mid-March 2005. Of the 216 cases initially treated by JDR, 54 required prolon…	No
2-s2.0-59149096383	2009	Corrosion control technologies for wastewater treatment plants	Severe corrosion of metallic components and deterioration of nonmetallic components at wastewater treatment plants on two U.S. Army installations in the northwest and southeast part of the United States was identified. The components of particular interest were sludge scrapers, gratings, ladders, and electrical junction boxes that have been exposed to high humidity and corrosive atmospheres conta…	No
2-s2.0-62349132266	2009	Targeting mammalian target of rapamycin by rapamycin prevents tumor progression in an oral-specific chemical carcinogenesis model	The increased molecular understanding of cancerous growth may now afford the opportunity to develop novel therapies targeting specific dysregulated molecular mechanisms contributing to the progression of each cancer type. In this regard, the aberrant activation of Akt/mammalian target of rapamycin (mTOR) pathway is a frequent event in head and neck squamous cell carcinomas (HNSCC), thus represent…	No
2-s2.0-58849115532	2009	Cryptosporidium genotype and subtype distribution in raw wastewater in Shanghai, China: Evidence for possible unique cryptosporidium hominis transmission	To identify the genotype and subtype distributions of Cryptosporidium oocysts in domestic wastewater in Shanghai, China, and to facilitate the characterization of the endemic transmission of cryptosporidiosis, raw domestic wastewater samples were collected from four wastewater treatment plants in Shanghai, China, from December 2006 to April 2007. Genotypes of Cryptosporidium species were detected…	No
2-s2.0-61849112233	2009	PAHs underfoot: Contaminated dust from coal-tar sealcoated pavement is widespread in the United States	We reported in 2005 that runoff from parking lots treated with coal-tar-based sealcoat was a major source of polycyclic aromatic hydrocarbons (PAHs) to streams in Austin, Texas. Here we present new data from nine U. S. cities that show nationwide patterns in concentrations of PAHs associated with sealcoat Dust was swept from parking lots in six cities in the central and eastern U. S., where coal-…	No
2-s2.0-78651564117	2009	Phycoremediation of sewage using microalgae chlorella Sp.	Phycoremediation is a novel technique that uses algae to cleanup contaminated soil and water. It takes advantage of natural ability of algae to take up, accumulate, and sometimes degrade constituents that are present in their growth environment. The present work deals with the study of remediation of sewage water using Chlorella, which is an alga, isolated from Kalapatti pond, Coimbatore. The rem…	No
2-s2.0-67649292336	2009	Development of a technically defensible soil gas sampling strategy for vapour intrusion assessments	Soil vapour intrusion is now commonly evaluated as part of human health risk assessments at contaminated sites where buildings or other structures are located in close proximity to volatile organic chemicals (VOCs) in subsurface soils and groundwater. Investigation of the vapour intrusion pathway often requires that VOC concentrations in the soil gas adjacent to buildings and structures be charac…	No
2-s2.0-56549112335	2009	Enhanced mobilization of arsenic and heavy metals from mine tailings by humic acid	Arsenic and heavy metal mobilization from mine tailings is an issue of concern as it might pose potential groundwater or ecological risks. Increasing attention recently has been focused on the effects of natural organic matter on the mobility behavior of the toxicants in the environment. Column experiments were carried out in this research study to evaluate the feasibility of using humic acid (HA…	No
2-s2.0-77954222056	2009	Treatment and degradability of direct dyes in textile wastewater by ozonation: A laboratory investigation	In this study the factors affecting the rate of chemical oxygen demand of a synthetic waste solution containing water soluble direct dyes (Sirius Red F3B and Sirius Blue SBRR) by ozone gas were investigated. The research was conducted using a batch bubble column to take the advantage of the intensive back-mixing that prevails in bubble columns. In result of our experimental study, we have shown t…	No
2-s2.0-85000336151	2009	Photo-degradation of clofibric acid by ultraviolet light irradiation at 185nm	As a metabolite of lipid regulators, clofibric acid (CA) was investigated in this study for its ultraviolet (UV) degradation at monochromatic wavelength of 185nm using Milli-Q water and sewage treatment plant (STP) effluent. The effects of CA initial concentration, solution pH, humic acid (HA), nitrate and bicarbonate anions on CA degradation performances were evaluated. All CA degradation patter…	No
2-s2.0-58749087040	2009	New geochronological, paleoclimatological, and archaeological data from the Narmada Valley hominin locality, central India	The oldest known fossil hominin in southern Asia was recovered from Hathnora in the Narmada Basin, central India in the early 1980's. Its age and taxonomic affinities, however, have remained uncertain. Current estimates place its maximum age at >236 ka, but not likely older than the early middle Pleistocene. The calvaria, however, could be considerably younger. We report recent fieldwork at Hathn…	No
2-s2.0-62349130287	2009	Dechlorination mechanism of 2,4-dichlorophenol by Ni/Fe nanoparticles in the presence of humic acid	To understand the feasibility of its application to the in situ remediation of contaminated groundwater, the dechlorination of 2,4-dichlorophenol (2,4-DCP) by Ni/Fe nanoparticles in the presence of humic acid (HA) was investigated. We found that, as high performance liquid chromatography (HPLC) was used, the 2,4-DCP was first quickly reduced to o-chlorophenol (o-CP) and p-chlorophenol (p-CP), and…	No
2-s2.0-68449094952	2009	Performance analysis in stepped solar still for effluent desalination	In this work, a stepped solar still and an effluent settling tank are fabricated and tested for desalinating the textile effluent. The effluent is purified in an effluent settling tank. In this tank, large and fine solid particles are settled and clarified. The settled effluents are used as raw water in the stepped solar still. For better performance, the stepped solar still consists of 50 trays …	No
2-s2.0-48349095522	2009	Longitudinal and seasonal variation of the benthic macroinvertebrate community and biotic indices in an undisturbed Pyrenean river	The present work aims to analyze the spatio-temporal variability in benthic macroinvertebrate assemblages and biotic indices in an undisturbed and unpolluted Pyrenean river. Samples were collected seasonally over 2 year-cycles (2001-2002) at fifteen sampling sites along the Erro River (Ebro River Basin, Spain) during a exhaustive biomonitoring program following the IBMWP-IASPT scoring system prot…	No
2-s2.0-58149466865	2009	Polycarboxylic microsphere polymer gel for solid phase extraction of trace elements	A simple and sensitive method has been developed for the determination of trace elements (Cd, Co, Cu, Ni, Fe and Pb) in sea water and natural waters by electrothermal atomic absorption spectrometry. The method is based on column solid phase extraction of trace elements on a newly synthesized polycarboxylic gel. The sorbent was prepared by dispersion copolymerization of methacrylic acid (as a mono…	No
2-s2.0-58149110940	2009	Emerging control technologies for volatile organic compounds	Environmental problems associated with volatile organic compounds (VOCs) in the atmosphere have provided the driving force for sustained fundamental and applied research in the area of environmental remediation. Conventional methods currently used to treat VOCs include incineration, condensation, adsorption, and absorption. Incineration and condensation are cost-effective only for moderate to hig…	No
2-s2.0-62649144052	2009	The Transfiguration continental red-bed Cu-Pb-Zn-Ag deposit, Quebec Appalachians, Canada	The Transfiguration Cu-Pb-Zn-Ag deposit, enclosed within reduced grey sandstone, is associated with continental red beds of the Lower Silurian Robitaille Formation in the Quebec Appalachians, Canada. The Robitaille Formation rests unconformably on foliated Cambro-Ordovician rocks. The unconformity is locally cut by barite veins. The basal unit of the Robitaille Formation comprises green wacke and…	No
2-s2.0-71249135176	2009	Microbiologic considerations in sepsis in elderly	Infection is a sine qua non sepsis. Sepsis can complicate infection occurring at any site, most commonly the respiratory tract, abdomen and blood stream. More than 90% of cases of sepsis are caused by bacteria and Gram-negative and Gram-positive organisms occur with approximately equal frequency. Fungi, in particular Candida species, are sometimes responsible, but a wide variety of other organism…	No
2-s2.0-70350573025	2009	Interactions between synoptic, intraseasonal and interannual convective variability over Southern Africa	After removing the annual cycle, a principal component analysis is applied to the daily outgoing longwave radiation anomaly field, used here as a proxy for atmospheric convection. The analysis is carried out over the southern African region (7.5Â°E-70Â°E, 10Â°S-40Â°S) for austral summer (November through February) for the period 1979-1980 to 2006-2007. The first five principal components (PC) are…	No
2-s2.0-62249162951	2009	Extreme value analysis in the Danube lower basin discharge time series in the twentieth century	The daily discharge time series in the lower Danube basin (Orsova) have been considered for the 1900-2005 period. The extreme value theory (EVT) is applied for the study of daily discharges incorporating some covariates. Two methods are applied for fitting the data to an extreme value distribution: block maxima and peaks over thresholds (POT). Using the block maxima approach associated with the u…	No
2-s2.0-62249132941	2009	Unanswered questions in venous thromboembolism	We have made great strides in the diagnosis, treatment and prevention of venous thromboembolism (VTE). Despite these advances, however, questions remain. Perhaps the most important unmet need is the development and implementation of strategies to increase the uptake of guidelines for thromboprophylaxis. VTE is largely preventable with appropriate prophylaxis. New oral anticoagulants have the pote…	No
2-s2.0-69549134167	2009	Sampling strategies for testing and evaluation of soil contamination in riparian systems at the Tisza River Basin, Hungary	During the year 2000, two significant pollution waves came from Romanian mines to Hungary and went along the Tisza River, causing serious damage to the ecosystem of the river. The first one, cyanide pollution, at the end of January had an instantaneous effect on the living system; the second, heavy-metal pollution in March, resulted in a long-term effect. The heavy-metal pollution that arrived wi…	No
2-s2.0-58149232260	2009	Comparison of a modified spectrophotometric and the pH-stat methods for determination of the degree of hydrolysis of whey proteins hydrolysed in a tangential-flow filter membrane reactor	A procedure was developed to determine the degree of hydrolysis (DH) of whey protein hydrolysates (WPH) during hydrolysis in either 3 kDa or 10 kDa tangential-flow filter (TFF) enzymatic membrane reactors (EMR). Protease N Amano G (IUB 3.4.24.28, Bacillus subtilis) was used to hydrolyse an initial 5% (w v-1) aqueous solution of whey protein isolate (86.98% protein) at pH 7.0 and 55 Â°C with conti…	No
2-s2.0-70349983288	2009	Recent changes in heavy metal storage in flood-plain soils of the Lahn River, central Germany	Between 1995 and 2007, the concentrations of Pb and Zn in floodplain soils increased along a 60-km reach of the Lahn River, Germany, suggesting that the storage of some metals in the fluvial system is out of phase with recent declines in the release of metals to the environment. Re-sampling of surface soils to 5 cm along five transects perpendicular to the river indicated that the concentration o…	No
2-s2.0-77949642161	2009	Palaeolimnology without a core: 153 years of diatoms and cultural environmental change in a shallow lowland lake (Belgium)	Time series of diatom assemblage composition can be obtained from samples of various collection materials. This allows assessment of 'more natural' conditions and their temporal variability in shallow lakes and ponds, similar to traditional core-based palaeolimnology. Such information is useful to underpin restoration targets that are ecologically relevant and that conform to legal requirements p…	No
2-s2.0-68149166566	2009	Contemporary estimates of atmospheric nitrogen deposition to the watersheds of New York State, USA	Atmospheric inputs of reactive nitrogen (N) to ecosystems are a particular concern in the northeastern USA, including New York State, where rates of atmospheric N deposition are among the highest in the nation. We calculate the seasonal and annual spatial variations of contemporary inorganic atmospheric N deposition loading to multi-scale watersheds across New York State using numerous monitoring…	No
2-s2.0-70349783790	2009	Comments on Graf, Journal of Archaeological Science 36, 2009 \ \"The Good, the Bad, and the Ugly\": evaluating the radiocarbon chronology of the middle and late Upper Paleolithic in the Enisei River valley, south-central Siberia\""	Here I present a critical evaluation of the analysis conducted by Graf [Graf, K.E., 2009. \The Good, the Bad, and the Ugly\": Evaluating the radiocarbon chronology of the middle and late Upper Paleolithic in the Enisei River valley, south-central Siberia. Journal of Archaeological Science 36, 694-707] of the Paleolithic radiocarbon (14C) dataset for the Upper Paleolithic sites in the Yenisei Rive…	No
2-s2.0-58049125208	2009	Variations of Pb in a mine-impacted tropical river, Taxco, Mexico: Use of geochemical, isotopic and statistical tools	The potential environmental threat from Pb in Mexican rivers impacted by historic mining activities was studied using geochemical, isotopic and statistical methods. Lead geochemical fractionation and factor analysis of fractionated and total Pb indicate that anthropogenic sources have contributed significantly to Pb concentrations, while natural sources have contributed only small amounts. The an…	No
2-s2.0-84864211103	2009	Geology of the Ore Fault Ni-Cu deposit, Bird River Sill Complex, Manitoba	The geology of the Ore Fault Ni-Cu deposit has been reinterpreted in the light of recent studies of the geology of the Neoarchean Bird River Sill Complex and the occurrence of economic Ni-Cu and Zn-Cu-Ag mineralization. The Ni-Cu sulfides are hosted by the lower of two parallel NNW-trending and moderately W-dipping mafic-ultramafic intrusions related to the Bird River Sill Complex. The bodies int…	No
2-s2.0-72149134235	2009	Use of direct numerical simulation (DNS) data to investigate spatial resolution issues in measurements of wall-bounded turbulence	The effect of limited spatial resolution for hot-wire anemometry (HWA) is investigated by analysing the two-dimensional energy spectra from direct numerical simulation (DNS) of turbulent channel flow at ReÏ„ â‰ˆ 950. Various spanwise filter lengths are applied to the streamwise velocity components in order to mimic the limited spatial resolution of a single-normal hot-wire experiment. Clear atten…	No
2-s2.0-77349100842	2009	Veronico beccabungae-callitrichetum stagnalis (Oberd. 1957) Müller 1962, a plant association new to Poland - Quality of habitat	The paper presents a community of water plants that is new to Poland, Veronico beccabungae-Callitrichetum stagnalis (Oberd. 1957) MÃ¼ller 1962. This community belongs to the class Potametea. It was discovered in the village of OdrowaÌ§Å¼ near the town of Krapkowice in Silesia (SW Poland). Veronico beccabungae-Callitrichetum stagnalis in Poland occurs within an irregularly shaped shallow underwate…	No
2-s2.0-58349119586	2009	Long-term changes in mollisol organic carbon and nitrogen	Conversions of Mollisols from prairie to cropland and subsequent changes in crop production practices in the Midwestern USA have resulted in changes in soil organic matter. Few studies have used archived samples, long-term resampling of soils to a depth of 1 m, and space for time studies to document these changes. We resampled soils by depth (0-100 cm) in fields at 19 locations in central Illinoi…	No
2-s2.0-67549115337	2009	An appraisal of current management of childhood urinary tract infections among private medical practitioners.	BACKGROUND: Private medical practitioners manage substantial number of children with urinary tract infection in Nigeria. It is important to evaluate the management of urinary tract infection (UTI), because of complications that may arise form improper treatment. METHODS: This study was conducted during the 10th Annual General and Scientific Conference of Guild of Medical Directors in Kano. Study …	No
2-s2.0-73249142825	2009	Nonylphenol mass transfer from field-aged sediments and subsequent biodegradation in reactors mimicking different river conditions	Purpose: Sediments can function as secondary source for water pollution of aerobically biodegradable non-halogenated organic compounds, which are persistent in anaerobic sediments. The mass transfer of compounds from sediment to bulk water depends on hydraulic conditions. In this study, desorption, mass transfer and biodegradation are investigated under settled and resuspended sediment conditions…	No
2-s2.0-56949092759	2009	Sr isotopes as a tracer of weathering processes and dust inputs in a tropical granitoid watershed, Luquillo Mountains, Puerto Rico	Sr isotope data from soils, water, and atmospheric inputs in a small tropical granitoid watershed in the Luquillo Mountains of Puerto Rico constrain soil mineral development, weathering fluxes, and atmospheric deposition. This study provides new information on pedogenic processes and geochemical fluxes that is not apparent in watershed mass balances based on major elements alone. 87Sr/86Sr data r…	No
2-s2.0-69549113371	2009	Toward a holistical perception of the content of business ethics	Purpose: The purpose of this paper is to offer a new requisitely holistic definition of business ethics (BE) as a crucial component of business cybernetics and practice. The present contribution considers a basic problem: how humans use BE to influence their business processes. Therefore, business is/should be investigated from the viewpoint of ethics. Requisite holism of understanding and consid…	No
2-s2.0-67649482639	2009	Provenance of basalt blocks from Roman sites in Vleuten-De Meern (the Netherlands) traced to the Tertiary Siebengebirge (Germany): A geoarchaeological quest using petrological and geochemical methods	Unshaped basalt blocks from archaeological sites along the border of the Roman Empire (limes) in the lower Rhine area near Vleuten-De Meern (Utrecht) have been studied petrographically, analysed by XRF for major and trace elements, and dated by the 40Ar/39Ar method. The blocks are from a revetment in the bank of a fossil branch of the Rhine and a contiguous ship De Meern 4, both built around 100 …	No
2-s2.0-58949100859	2009	Light-activated cytotoxic compounds from Malaysian microorganisms for photodynamic therapy of cancer	Photodynamic therapy (PDT) is a promising cancer treatment which involves activation of a photosensitizing drug with light to produce reactive oxygen species that kill tumors without causing damage to unirradiated normal tissues. To date, only PhotofrinÂ®, FoscanÂ® and LevulanÂ® have been approved for clinical treatment of cancer. Tropical habitats such as those found in Malaysia are attractive s…	No
2-s2.0-57149110613	2009	Transcription of immune genes upon challenge with viral hemorrhagic septicemia virus (VHSV) in DNA vaccinated rainbow trout (Oncorhynchus mykiss)	Even though DNA vaccination has proven as one of the most effective methods in controlling fish rhabdoviruses, the immune mechanisms responsible for protection are still unknown. Many studies have focused on studying which cytokines and immune genes are triggered in response to the vaccine at different times post-vaccination. However, to elucidate the mechanism(s) responsible for protection, to o…	No
2-s2.0-59449110856	2009	Strategic design of an effective ?-lactamase inhibitor LN-1-255, A 6-alkylidene-2?-substituted penicillin sulfone	In an effort to devise strategies for overcoming bacterial Î²-lactamases, we studied LN-1-255, a 6-alkylidene-2â€²-substituted penicillin sulfone inhibitor. By possessing a catecholic functionality that resembles a natural bacterial siderophore, LN-1-255 is unique among Î²-lactamase inhibitors. LN-1-255 combined with piperacillin was more potent against Escherichia coli DH10B strains bearing bla …	No
2-s2.0-57249103308	2009	Analytical methods for determination of free metal ion concentration, labile species fraction and metal complexation capacity of environmental waters: A review	Different experimental approaches have been suggested in the last few decades to determine metal species in complex matrices of unknown composition as environmental waters. The methods are mainly focused on the determination of single species or groups of species. The more recent developments in trace elements speciation are reviewed focusing on methods for labile and free metal determination. El…	No
2-s2.0-61649120422	2009	Multiple glass transitions in star polymer mixtures: Insights from theory and simulations	The glass transition in binary mixtures of star polymers is studied by mode coupling theory and extensive molecular dynamics computer simulations. In particular, we have explored vitrification in the parameter space of size asymmetry Î´ and concentration Ï2 of the small star polymers at fixed concentration of die large ones. Depending on the choice of parameters, three different glassy states ar…	No
2-s2.0-62749117268	2009	Storm drains are sources of human fecal pollution during dry weather in three urban Southern California watersheds	Coastal urbanized areas in Southern California experience frequent beach water quality warnings in summer due to high concentrations of fecal indicator bacteria (FIB). Remediation can be difficult, as sources are often unknown. During two summers, we sampled three urbanized watersheds in Santa Barbara, CA at sites with historically high FIB concentrations to determine if human fecal matter was in…	No
2-s2.0-56149111671	2009	Potential of pomegranate husk carbon for Cr(VI) removal from wastewater: Kinetic and isotherm studies	Pomegranate husk was converted into activated carbon and tested for its ability to remove hexavalent chromium from wastewater. The new activated carbon was obtained from pomegranate husk by dehydration process using concentrated sulfuric acid. The important parameters for the adsorption process such as pH, metal concentration and sorbent weight were investigated. Batch equilibrium experiments exh…	No
2-s2.0-57649090031	2009	Carrier element-free coprecipitation (CEFC) method for the separation, preconcentration and speciation of chromium using an isatin derivative	A new, simple, rapid and sensitive separation, preconcentration and speciation procedure for chromium in environmental liquid and solid samples has been established. The present speciation procedure for Cr(III) and Cr(VI) is based on combination of carrier element-free coprecipitation (CEFC) and flame atomic absorption spectrometric (FAAS) determinations. In this method a newly synthesized organi…	No
2-s2.0-58249107954	2009	Chlorinated and brominated organic pollutants in contaminated river sediments	Sediments are the main abiotic reservoirs where POPs from different emission sources are accumulated. In the last few decades, a great deal of emphasis has been placed on evaluating the contamination of \classical\" POPs such as PCBs, PCDDs and PCDFs. More recently, scientific interest has been focused on other groups of POPs, the so-called \"emerging\" POPs, such as PCAs and brominated POPs. The…	No
2-s2.0-58149156416	2009	Zero valent iron remediation of a mixed brominated ethene contaminated groundwater	The suitability of a granulated zero valent iron (ZVI) permeable reactive barrier (PRB) remediation strategy was investigated for tribromoethene (TriBE), cis-1,2-dibromoethene (c-DBE), trans-1,2-dibromoethene (t-DBE) and vinyl bromide (VB), via batch and large-scale column experiments that were subsequently analysed by reactive transport modelling. The brominated ethenes in both batch and large-s…	No
2-s2.0-56249121502	2009	Kinetics of 2,6-dimethylaniline degradation by electro-Fenton process	A new approach for promoting ferric reduction efficiency using a different electrochemical cell and the photoelectro-Fenton process has been developed to degrade organic toxic contaminants. The use of UVA light and electric current as electron donors can efficiently initiate the Fenton reaction. 2,6-Dimethylaniline (2,6-DMA) was the target compound in this study. Effects of initial pH (pHi), Fe2+…	No
2-s2.0-56649117553	2009	A comparative study of natural, formaldehyde-treated and copolymer-grafted orange peel for Pb(II) adsorption under batch and continuous mode	Natural, formaldehyde-treated and copolymer-grafted orange peels were evaluated as adsorbents to remove lead ions from aqueous solutions. The optimum pH for lead adsorption was found to be pH 5. The adsorption process was fast, reaching 99% of sorbent capacity in 10 min for the natural and treated biomasses and 20 min for the grafted material. The treated biomass showed the highest sorption rate …	No
2-s2.0-61849184078	2009	A short-range ship navigation system based on ladar imaging and target tracking for improved safety and efficiency	A new maritime navigation system based on a laser range-finder scanner for obstacle avoidance and precise maneuvering operations is described in this paper. The main novelty of this work is the adaptation and implementation of known technology for laser range finding and algorithms for target tracking into a system that operates in real time and has been tested in different natural sea and inland…	No
2-s2.0-58049195554	2009	Putting the pieces together in diabetes research: Towards a hierarchical model of whole-body glucose homeostasis	Type 2 diabetes is one of the most widespread and rapidly spreading diseases world-wide and has been subject of extensive research efforts. However, understanding the molecular basis of the disease is increasing piecemeal and a consensus regarding the overall picture of normal metabolic regulation and malfunction in diabetes has not emerged. A systems biology approach, combining mathematical mode…	No
2-s2.0-64749104004	2009	Conjunctive simulation of surface water and ground water resources under uncertainty	The increasing demand for water, especially in semiarid regions, poses new challenges for water resources managers. Hence, they must understand the interactions between surface water and groundwater systems, especially under uncertainty. In groundwater systems, uncertainty arises from boundary conditions and aquifer parameters, while in surface water systems, uncertainty stems from the natural va…	No
2-s2.0-63149189337	2009	Natural organic matter-mediated phase transfer of quantum dots in the aquatic environment	Imminent commercialization of semiconductor quantum dots (QDs) has raised concerns regarding the potential environmental impact of these materials. Understanding the partitioning behavior and obtaining information on the mobility and persistence of QDs in water is key to evaluating potential ecological hazards posed by QDs in the environment. The role of natural organic matter (NOM) in the phase …	No
2-s2.0-59649119204	2009	Actor modelling and its contribution to the development of integrative strategies for management of pharmaceuticals in drinking water	Widespread presence of human pharmaceuticals in water resources across the globe is documented. While some, but certainly not enough, research on the occurrence, fate and effect of pharmaceuticals in water resources has been carried out, a holistic risk management strategy is missing. The transdisciplinary research project \start\" aimed to develop an integrative strategy by the participation of …	No
2-s2.0-57049127574	2009	The impact of new developments on river water quality from an integrated system modelling perspective	New housing areas are a ubiquitous feature of modern life in the developing and developed world alike built in response to rising social, demographic and economic pressures. Inevitably, these new developments will have an impact on the environment around them. Empirical evidence confirms the close relationship between urbanisation and ambient water quality. However, what is lacking so far is a de…	No
2-s2.0-58549108813	2009	Sequestered organelles sustain aerobic microbial life in anoxic environments	We report aerobic eukaryotic microbial life in the dimly lit anoxic water layer of a small freshwater lake. The microbial eukaryote is the ciliated protozoon Histiobalantium natans. Electron microscopy of thin sections shows that the cytoplasm of the ciliate harbours sequestered chloroplasts and sequestered mitochondria. The sequestered chloroplasts are attached or in very close proximity to the …	No
2-s2.0-64549138873	2009	A new haemogregarina species of the alligator snapping turtle, macrochelys temminckii (testudines: Chelydridae), in georgia and Florida that produces macromeronts in circulating erythrocytes	Haemogregarina macrochelysi n. sp. (Apicomplexa: Haemogregarinidae) of the alligator snapping turtle, Macrochelys temminckii, is characterized by slender, recurved gamonts 29-35 Ã— 34.5 Î¼m, in which the anterior limb comprises 48-54 of the total length. The gamont nucleus, 57.5 Ã— 25 Î¼m, is situated at approximately midbody of the gamont. Meronts typical of Haemogregarina occupying erythrocytes…	No
2-s2.0-62949242021	2009	Breakthrough of attenuating contaminant plumes in pumping wells: Analytical model and implications for integral pumping tests	Monitoring of contaminant plumes and predicting their future fate are essential for effective management of groundwater contaminants. Solute breakthrough curves from operating pumping wells can provide information on the water quality in relatively large aquifer regions, which may be unavailable to instrumentation and direct measurement for practical and/or economical reasons. Relations between s…	No
2-s2.0-84866267162	2009	Antiretroviral treatment outcomes from a nurse-driven, community-supported HIV/AIDS treatment programme in rural lesotho: Observational cohort assessment at two years	Â© 2009 Cohen et al; licensee BioMed Central Ltd. Introduction: Lesotho has the third highest HIV prevalence in the world (an adult prevalence of 23.2%). Despite a lack of resources for health, the country has implemented state-of-the-art antiretroviral treatment guidelines, including early initiation of treatment (<350 cells/mm3), tenofovir in first line, and nurse-initiated and managed HIV care…	No
2-s2.0-61649128228	2009	Model for CO<inf>2</inf> leakage including multiple geological layers and multiple leaky wells	Geological storage of carbon dioxide (CO2) is likely to be an integral component of any realistic plan to reduce anthropogenic greenhouse gas emissions. In conjunction with large-scale deployment of carbon storage as a technology, there is an urgent need for tools which provide reliable and quick assessments of aquifer storage performance. Previously, abandoned wells from over a century of oil an…	No
2-s2.0-67649201743	2009	Long-term tributyltin (TBT)-induced sterilization of neogastropods: Persistence of effects in Ocenebra erinacea over 20 years in the vicinity of Falmouth (Cornwall, UK)	A population of the neogastropod Ocenebra erinacea sited close to the shipyard at Falmouth (Cornwall: south-west England) has been monitored over a period of 20 years for the effects of exposure to the antifouling agent tributyltin (TBT). During the years 1986 to 1995 the proportion of females sterilized through abnormal development of the oviduct increased from 36% to 87%. Despite legislative re…	No
2-s2.0-61649127576	2009	Anti-platelet drugs and outcome in severe infection: Clinical impact and underlying mechanisms	Platelet activation contributes to microvascular thrombosis and organ failure in systemic inflammation. We tested the hypothesis whether anti-platelet drugs might favourably affect outcome in patients at risk for organ failure as well as in a mouse model of endotoxin shock. Two hundred twenty-four consecutive patients who were admitted for community acquired pneumonia over a time period of 5 year…	No
2-s2.0-58549085754	2009	Late-Holocene equatorial environments inferred from deposition processes, carbon isotopes of organic matter, and pollen in three shallow lakes of Gabon, west-central Africa	Seven vibro-cores were collected from three shallow lakes of the Gabon (KamalÃ©tÃ©, NguÃ¨ne, Maridor) along a 300-km west-east transect close to the Equator. These lakes are located in very distinct landscapes: coastal forest-savanna mosaic, rain forest and savanna with colonising forest, respectively. Core chronologies were established by radiocarbon dating. Study of these lacustrine archives (t…	No
2-s2.0-61449261888	2009	Live HeLa cells preconcentrate and differentiate inorganic arsenic species	Live HeLa cells immobilized on Sephadex G-50 beads were used as a medium for the preconcentration and speciation of inorganic arsenic. The sorption of arsenic species by live HeLa cells involves both surface uptake and bioaccumulation within the cells. At pH 3.0, the cells accumulate arsenate with high specificity over arsenite: 83.0 Â± 1.3% of the arsenate was sorbed while the retention of arsen…	No
2-s2.0-62749195512	2009	Nature of uranium mineralisation in the Kerpura - Tiwari-ka-bas area, Sikar district, Rajasthan	Mineralisation of uraninite and brannerite occurs in the albitised metasedimentary and intrusive igneous rocks of Kerpura-Tiwari-ka-bas area in Sikar district, Rajasthan. Samples collected from well dumps contain 0.016 to 1.52% U3O8 with very low ThO2. The host rocks show wide variation in chemical composition due to varying degree of alkali metasomatism, associated alteration and composition of …	No
2-s2.0-57049115936	2009	Arsenic retention and release in ombrotrophic peatlands	Organic matter can play an important role in the mobility and fate of As in the environment, but there is a lack of data on As biogeochemistry in ombrotrophic peatlands. The aim of this study was to investigate As retention and release in atmospherically contaminated ombrotrophic peat soils in the Peak District National Park (UK). Solid phase As concentrations in the peat soils exceed 25 mg kg- 1…	No
2-s2.0-58649091299	2009	Non-linear regression model for spatial variation in precipitation chemistry for South India	Chemical composition of rainwater changes from sea to inland under the influence of several major factors - topographic location of area, its distance from sea, annual rainfall. A model is developed here to quantify the variation in precipitation chemistry under the influence of inland distance and rainfall amount. Various sites in India categorized as 'urban', 'suburban' and 'rural' have been co…	No
2-s2.0-63849131902	2009	Diel changes in phytoplankton composition and abundance in the surface and sub-surface strata from a shallow eutrophic pond	Representative phytoplankton assemblages were identified in a eutrophic pond over a 24 hour period. One assemblage characterized species in the surface (neuston) layer and another consisted of algae from 2, 5, and 20 cm sub-surface depths. The surface layer (0 cm) included a similar, but less diverse assemblage of species, and a lower abundance of cells per unit volume, than those at the lower de…	No
2-s2.0-58849110679	2009	Analysis, design and construction of complex concrete structures for the water treatment industry	The design and construction of concrete water treatment and storage structures in Australia has catered for the existing markets. The next generation of these structures needs a more sophisticated approach. Engineers who analyse and design water treatment plants, or water and liquid storage structures, as well as other complex reinforced and pre-stressed concrete structures, will find this paper …	No
2-s2.0-59149089316	2009	A comparative study of surface and subsurface flow constructed wetlands for treatment of combined sewer overflows: A greenhouse experiment	The use of surface flow (SFCWs) and subsurface flow constructed wetlands (SFCWs) for the treatment of combined sewer overflows was assessed at pilot scale. Synthetic wastewater was applied in three batches with decreasing concentrations to mimic concentration profiles that are obtained in the field during overflow events. Three simulated combined sewer overflows were applied on each wetland. Comp…	No
2-s2.0-59149098220	2009	Modelling pollutant removal in a pilot-scale two-stage subsurface flow constructed wetlands	The hydraulic behaviour and effluent pollutant concentrations in a pilot-scale two-stage subsurface flow constructed wetland for treatment of municipal wastewater have been simulated. The experimental pilot plant is located in San Michele di Ganzaria (Eastern Sicily) and consists of four lines of two-stage subsurface flow constructed wetlands for secondary or tertiary treatment of municipal waste…	No
2-s2.0-58149302674	2009	Whole tree harvesting can reduce second rotation forest productivity	The practice of harvesting forest residues is rapidly increasing due to rising demand for renewable energy. However, major concerns have been raised about the sustainability of this practice and its net impact on productivity, in particular through negative effects on the growth of subsequent tree crops. We measured height, diameter at breast height (DBH) and tree spacing density on 23-year-old s…	No
2-s2.0-58249119822	2009	Fullerenes for aromatic and non-aromatic N-nitrosamines discrimination	The detection of N-nitrosamines (NAms) in water supplies is an environmental and public health issue because many NAms are classified as probable human carcinogens. Non-aromatic (aliphatic and cyclic) NAms are more toxic than aromatic ones as their maximum admissible concentration is limited in drinking water (20-2000 ng L-1). From that premise, a simple and novel method to discriminate between b…	No
2-s2.0-57249095828	2009	A novel fiber-packed column for on-line preconcentration and speciation analysis of chromium in drinking water with flame atomic absorption spectrometry	A novel on-line preconcentration and determination system based on a fiber-packed column was developed for speciation analysis of Cr in drinking water samples prior to its determination by flame atomic absorption spectrometry (FAAS). All variables involved in the development of the preconcentration method including, pH, eluent type, sample and eluent flow rates, interfering effects, etc., were st…	No
2-s2.0-57249088960	2009	Butyltin occurrence and risk assessment in the sediments of the Iberian Peninsula	The occurrence of butyltin (BT) compounds in more than 50 recent sediment samples of the Iberian Peninsula, collected in the harbours of the western Mediterranean Sea (Spain) and the North Atlantic Ocean (Portugal), including domestic and industrial sewage disposal sites, has been assessed. The highest levels of tributyltin (TBT) (7673 Î¼g kg-1 dry wt.) were detected in commercial harbours associ…	No
2-s2.0-58149492774	2009	Role of coagulase-negative staphylococci in human disease	Coagulase-negative staphylococci (CNS) are normal inhabitants of human skin and mucous membranes. They have long been dismissed as culture contaminants, but now the potentially important role of CNS as pathogens and their increasing incidence has been recognized. Approximately 55-75% of nosocomial isolates is methicillin resistant. CNS were the first organisms in which glycopeptide resistance was…	No
2-s2.0-58149123396	2009	Remote sensing of biological soil crust under simulated climate change manipulations in the Mojave Desert	Earth's arid and semiarid ecosystems are subject to novel combinations of disruptive factors and unprecedented rates of change. Biotic soil crust is believed to be sensitive to impacts caused by land use and climate changes. This study examined the potential for spectral detection of different biological soil crusts (BSC: cyanobacteria, moss and lichen) and bare soil components at a long-term man…	No
2-s2.0-58149496338	2009	Single- and dual-porosity modelling of flow in reclaimed mine soil cores with embedded lignitic fragments	Lignitic mine soils represent a typical two-scale dual-porosity medium consisting of a technogenic mixture of overburden sediments that include lignitic components as dust and as porous fragments embedded within a mostly coarse-textured matrix. Flow and transport processes in such soils are not sufficiently understood to predict the course of soil reclamation or of mine drainage. The objective of…	No
2-s2.0-63549113608	2009	Size fractionation and optical properties of colloids in an organic-rich estuary (Thurso, UK)	The optical characteristics of a black water river estuary from the north coast of Scotland were examined in the filtered (0.4 Î¼m), ultrafiltered (5 kDa) and colloid-enriched fractions of estuarine samples. The samples were collected over the full salinity range during a period when the pH was relatively constant (8.2-8.5) throughout the estuary, allowing the influence of salinity on estuarine c…	No
2-s2.0-60449100439	2009	Effect of saline water and sludge addition on biodegradation of municipal solid waste in bioreactor landfills	Bioreactor landfills require sufficient moisture to optimize the biodegradation processes and methane generation. In arid regions, this is problematic given the lack of fresh water supplies. Saline water can be used but may inhibit the biodegradation of the municipal solid waste (MSW) in landfills. Sludge may be used to enhance the biodegradation of MSW under saline conditions. For this study, tw…	No
2-s2.0-64549152145	2009	Runoff and leaching of metolachlor from Mississippi River alluvial soil during seasons of average and below-average rainfall	The movement of the herbicide metolachlor [2-chloro-N-(2-ethyl-6- methylphenyl)-N-(2-methoxy-1-methylethyl)acetamide] via runoff and leaching from 0.21 ha plots planted to corn on Mississippi River alluvial soil (Commerce silt loam) was measured for a 6-year period, 1995-2000. The first three years received normal rainfall (30 year average); the second three years experienced reduced rainfall. Th…	No
2-s2.0-60649096952	2009	Recent low-flow and groundwater storage changes in upland watersheds of the Kanto Region, Japan	Annual trends in baseflow and groundwater storage over the past 40 years are deduced from stream flow observations in four upland catchments in the northern parts of the Kanto region. The analysis is based on the assumption that baseflow is an exponential decay function of time, which yields a linear relationship between storage and baseflow. These catchments are part of the water supply system f…	No
[truncated: 1,014 more rows]
